# Supplementary material for: Progress in adolescent health and wellbeing: tracking 12 headline indicators for 195 countries and territories, 1990–2016
Source: PubMed Central journal article supplement (PMC6429986; doi:10.1016/s0140-6736(18)32427-9), 2019-03-16
Supplement: mmc1.pdf [file mmc1.pdf]

# THE LANCET

## Supplementary appendix

This appendix formed part of the original submission and has been peer reviewed. We post it as supplied by the authors.

Supplement to: Azzopardi PS, Hearps SJC, Francis KL. Progress in adolescent health and wellbeing: tracking 12 headline indicators for 195 countries and territories, 1990–2016. *Lancet* 2019; published online March 12. [http://dx.doi.org/10.1016/S0140-6736\(18\)32427-9](http://dx.doi.org/10.1016/S0140-6736(18)32427-9).

## Appendices

Appendix 1 – Extended definitions of indicators and data sources

Appendix 2 – Data availability for NEET and Child Marriage

Appendix 3 – Uncertainty bounds for indicators at a country level: health outcomes (DALYs per 100 000 population due to Group 1 condition, Injuries, NCDs, self-harm, total DALYs, total YLL and total YLD), health risks (prevalence of daily tobacco use, binge drinking, anaemia, obesity and overweight) and determinants (Demand for modern contraception satisfied).

Appendix 4 – Population counts for each country and population scenarios

Appendix 5 – Counts of the indicators for the three country groups for two time points (typically 1990 and 2016) and scenarios.

Appendix 6 – Distribution of indicator estimates by the three country groups

Appendix 7 – Rates of change for the indicators by country

## Appendix 1 – Extended definitions of indicators and data sources

Indicators were organised into three main categories: health outcomes; health risks; and social determinants of health. The definition of each indicator and data sources are detailed here.

### Health outcomes

Disease burden was measured using Disability Adjusted Life Years (DALYs, the sum of years of healthy life lost due to either death or disability) as estimated by GBD2016. Modelled estimates were available for 333 causes for males and females aged 10 - 14 years, 15 - 19 years and 20 - 24 years, for 195 countries between 1990–2015 in five-year intervals, and for 2016. Of the causes included in GBD2016, nine were not modelled to contribute DALYs amongst adolescents (including some neonatal conditions and conditions more typical of later adulthood such as macular degeneration, atrial fibrillation, and Alzheimer’s disease). The remaining 324 conditions were distributed across three broad indicators as defined by the Commission: communicable, reproductive and nutritional conditions (‘Group 1’ conditions); injuries including assault, homicide and unintentional injuries such as from road traffic injuries; and non-communicable diseases (NCDs) which included chronic physical illness, mental and substance use disorders, and self-harm.<sup>1</sup> These three groups largely reflected level 1 conditions in the GBD hierarchy of causes, with the exception of self-harm which was moved from the GBD injury group to the NCD group in our analyses, given its relationship to mental disorders (consistent with the approach used in the Commission analyses).<sup>1</sup> Note that uncertainty estimates were not available for these modified groups; Appendix 3 reports uncertainty around the GBD level 1 groups and self-harm separately. Indicators were reported as DALYs per 100,000 population, with population denominators sourced from IHME, based on United Nations population estimates. The sum of these three indicators (all-cause DALYs) was the total disease burden experienced by adolescents.

### Health risks

Data relating to health risks were derived from GBD2016.<sup>2</sup> Tobacco smoking was defined as the population prevalence of using any type or quantity of smoked tobacco product on a daily basis.<sup>3</sup> Smoking prevalence data were obtained for males and females aged 10 – 24 years between 1990–2015 in five-year intervals and 2016.

Binge drinking was the indicator of risky alcohol use, defined as the proportion of 15 - 19-year olds who reported a binge ( $\geq 48$  grams of alcohol for females and  $\geq 60$  grams for males on a single occasion) in the preceding 12 months. This indicator was defined for 15 – 19 year olds specifically in the Commission; while early initiation of alcohol use affects neurocognitive development and future patterns of substance use, binge drinking at 15 – 19 years more closely relates to acute harm and is also harmonised with data availability.<sup>1</sup> The available data differed from the originally proposed indicator in the sex-specific definition of a binge and the time period it referred to (12 months vs.

30 days). Prevalence was estimated for males and females aged 15 - 19 years between 1990–2015 in five-year intervals and for 2016.

Data relating to overweight and obesity were sourced from GBD2016.<sup>4</sup> Overweight was defined using International Obesity Task Force (IOTF) age and sex-specific thresholds, equivalent to BMI  $\geq 25\text{kg}/\text{m}^2$  at age 18 years.<sup>5</sup> Prevalence estimates of overweight for adolescents derived from IOTF thresholds are typically lower than those derived using WHO thresholds.<sup>5</sup> The indicator of overweight included individuals who were obese. Prevalence of overweight was obtained for males and females aged 10 – 24 years between 1990–2015 in five-year intervals and 2016.

The Commission recommended iron deficiency anaemia (IDA) as an indicator of undernutrition. Although estimates of IDA were available from GBD2016, we have chosen to report the prevalence of all-cause anaemia due to the limited quality of primary data for IDA. GBD estimates the burden of IDA by first estimating the burden of anaemia. Known causes of anaemia are then assigned (including hookworm, schistosomiasis, HIV, malaria, other infections and neglected tropical diseases, maternal haemorrhage, gynaecologic disorders, gastrointestinal bleeding, chronic kidney disease, and haemoglobinopathies, and malaria). The remaining unassigned burden of anaemia is then redistributed to other unaccounted causes, including IDA.<sup>6</sup> As such, the IDA estimates in GBD have high uncertainty. The definition of anaemia in GBD2016 is similar to WHO thresholds. For 10 - 14 year olds, anaemia was defined as haemoglobin (g/L)  $<115$  for males and females (WHO  $<120$ ).<sup>7</sup> For 15 – 24 year olds, anaemia was defined as haemoglobin  $<130$  for males,  $<120$  for non-pregnant females, and  $<110$  for pregnant females.<sup>6</sup> The prevalence of anaemia was obtained for males and females aged 10 – 24 years between 1990–2015 in five-year intervals and 2016.

#### Social and structural determinants

We selected education data from the Barro-Lee dataset which provides educational attainment data for 146 countries from 1950 to 2010.<sup>8</sup> This dataset includes attainment data, measured in censuses and compiled by UNESCO, and estimates missing data using enrolment and population data. This dataset provided estimates of the prevalence of secondary school completion. The definition of secondary school completion was consistent with that of UNESCO: completion of secondary education most typically signified 12 or more years of education and prepared students for employment and/or tertiary education.<sup>9</sup> We reported this indicator for 20 – 24 year olds only as younger adolescents may not have completed secondary schooling. The Barro-Lee dataset is based on census data and modelled to provide complete estimates for 146 countries and territories. Three locations in the Barro-Lee dataset (Reunion, Hong Kong and Macao) were not otherwise included as countries in this analysis and were therefore excluded. Data were obtained for males and females aged 20 – 24 years for 143 countries from 1990 to 2010 (estimates more recent than 2010 were not available).

Data on the rate of adolescents not engaged in education, employment or training (NEET) were available from the International Labour Organization (ILO), compiled from labour force and other nationally representative surveys.<sup>10</sup> Data were available for 15 – 24 year olds rather than 20 – 24 year olds as defined in the 2016 Commission report (data for 10 – 14 year olds globally are limited). Data were available for 134 locations, however 10 of these were not

otherwise included in this analysis: Aruba, Falklands, Guernsey, Hong Kong, Kosovo, Macau, Netherlands Antilles, New Caledonia, Palau, and Reunion. Data for Kazakhstan were not sex-disaggregated and were also excluded. The 123 included countries had an estimate between 2007–2016, with some countries also having time-series data available (Appendix 2).

Data on adolescent live births were sourced from GBD2016. The Commission indicator was defined for 10 – 19 year olds, a definition that aligns with indicator 3.7.2. of the SDGs (adolescent birth rate for 10 – 14 year olds and 15 – 19 year olds, reported separately).<sup>11</sup> However, data quality differed significantly by age. GBD estimates for adolescent birth rates for 15 – 19 year olds are modelled from United Nations World Population Prospects, while estimates for 10 – 14 year olds are extrapolated based on observed ratios and adjusted for a pooled average age of menarche. In most countries, fertility amongst 10 – 14 year olds is very low and, given that estimates are extrapolated, the inclusion of 10 – 14 year olds in the definition largely dilutes all estimates by a similar factor and introduces measurement error. We therefore report the rate of adolescent live births per 1000 for 15 - 19 year olds, a more widely recognized indicator with better quality data. Data were obtained for 15 – 19 year old females for 195 countries from 1990 to 2016.

Child marriage data were generally limited in availability to those countries with household surveys and where child marriage tends to be more prevalent. Data on child marriage were drawn from a country-level dataset compiled by UNICEF, primarily drawing from available Demographic Health Surveys (DHS) and Multiple Indicator Cluster Surveys (MICS).<sup>12</sup> We included recent estimates for Paraguay (2016) and Nigeria (2017) that were not in the UNICEF dataset. Child marriage was defined as the proportion of 20 – 24 year old females reporting having been married or in union before the age of 18 years. Only a single most recent estimate was accessed for each country and we only included data from surveys between 2003 – 2016 (122 countries); 102 of these were sampled between 2010 – 2017. Child marriage data for two Pacific islands (Nauru and Tuvalu) were not otherwise included in the 195 countries of this analysis and excluded, resulting in data for 120 countries.

The Commission recommended that the indicator of unmet need for contraception function as a headline indicator of responsive health services. We reported on ‘demand for modern contraception satisfied’ (demand satisfied) in preference to unmet need, given that it is an SDG indicator, that it emphasises the importance of satisfying individuals’ own choices around family planning, and that it prioritises the use of modern methods of contraception.<sup>13</sup> Demand satisfied is the proportion who use modern contraceptives divided by the total demand for contraception. Total demand for contraception is defined as the proportion of women using any contraceptive (modern or traditional) plus the proportion of women with an unmet need for contraception (want to space or limit births but are not using any contraceptive method).<sup>13</sup> Modern contraception was defined as male or female condoms, oral contraceptive, spermicide foam/jelly, diaphragms, implants, injections, use of an intrauterine device, or male or female sterilization. Traditional methods included withdrawal, period abstinence, rhythm method, and lactational amenorrhea method. Data for demand satisfied have previously been modelled by IHME for 15 – 49 year

olds, and are provided here for 15-24 using the same methods.<sup>14</sup> Data were obtained for 15 – 24 year old females for 195 countries, from 1990 to 2016.

### Sociodemographic index

We included the IHME socio-demographic index (SDI) as an additional country-level indicator to provide context around the level of socio-economic development (reported in appendix 4).<sup>15</sup> The SDI is derived from three subscales: income per capita, average educational attainment for ages 15 or older, and the total fertility rate. Individual countries are scaled for each component of the SDI from 0 (worst value observed between 1980 - 2016) to 1 (best), with the SDI calculated as the geometric mean of the three rescaled components.

### References

1. Patton GC, Sawyer SM, Santelli JS, et al. Our future: a Lancet commission on adolescent health and wellbeing. *Lancet* 2016; **387**(10036): 2423-78.
2. G. B. D. Risk Factors Collaborators. Global, regional, and national comparative risk assessment of 84 behavioural, environmental and occupational, and metabolic risks or clusters of risks, 1990-2016: a systematic analysis for the Global Burden of Disease Study 2016. *Lancet* 2017; **390**(10100): 1345-422.
3. GBD Tobacco Collaborators. Smoking prevalence and attributable disease burden in 195 countries and territories, 1990-2015: a systematic analysis from the Global Burden of Disease Study 2015. *Lancet* 2017.
4. GBD 2015 Risk Factor Collaborators. Global, regional, and national comparative risk assessment of 79 behavioural, environmental and occupational, and metabolic risks or clusters of risks, 1990–2015: a systematic analysis for the Global Burden of Disease Study 2015. *Lancet* 2016; **388**: 1659-724.
5. Cole TJ, Lobstein T. Extended international (IOTF) body mass index cut-offs for thinness, overweight and obesity. *Pediatric obesity* 2012; **7**(4): 284-94.
6. Kassebaum NJ, G. B. D. Anemia Collaborators. The Global Burden of Anemia. *Hematol Oncol Clin North Am* 2016; **30**(2): 247-308.
7. World Health Organization. Haemoglobin concentrations for the diagnosis of anaemia and assessment of severity. Geneva: WHO, 2011.
8. Barro RJ, Lee JW. A new data set of educational attainment in the world, 1950–2010. *Journal of development economics* 2013; **104**: 184-98.
9. United Nations Educational Scientific and Cultural Organization. International Standard Classification of Education (ISCED 2011). Montreal, Canada: UNESCO Institute for Statistics, 2012.
10. International Labour Organization. Youth NEET rate. 2017. [http://www.ilo.org/ilostat/faces/oracle/webcenter/portalapp/pagehierarchy/Page3.jspx?MBI\\_ID=20](http://www.ilo.org/ilostat/faces/oracle/webcenter/portalapp/pagehierarchy/Page3.jspx?MBI_ID=20) (accessed January 2018).
11. Inter-Agency and Expert Group on SDG Indicators. Revised list of global Sustainable Development Goal Indicators, 2017.
12. UNICEF. Child marriage global database. 2017.
13. Fabic MS, Choi Y, Bongaarts J, et al. Meeting demand for family planning within a generation: the post-2015 agenda. *The Lancet* 2015; **385**(9981): 1928-31.
14. GBD SDG Collaborators. Measuring progress and projecting attainment on the basis of past trends of the health-related Sustainable Development Goals in 188 countries: an analysis from the Global Burden of Disease Study 2016. *Lancet* 2017; **390**(10100): 1423-59.
15. GBD SDG Collaborators. Measuring the health-related Sustainable Development Goals in 188 countries: a baseline analysis from the Global Burden of Disease Study 2015. *Lancet* 2016.

## Appendix 2 – Data availability for NEET and Child Marriage

The data on Child Marriage is compiled by and available from the UNICEF database: [https://data.unicef.org/wp-content/uploads/2015/12/Child-marriage-database\\_Nov-2017.xlsx](https://data.unicef.org/wp-content/uploads/2015/12/Child-marriage-database_Nov-2017.xlsx)

We updated estimates for child marriage for Paraguay and Nigeria using more recently available survey data: <http://mics.unicef.org/surveys>

Data for Not engaged in education, employment or training (NEET) was drawn from the International Labour Organization (ILO):

[http://www.ilo.org/ilostat/faces/oracle/webcenter/portalapp/pagehierarchy/Page3.jspx?MBI\\_ID=20](http://www.ilo.org/ilostat/faces/oracle/webcenter/portalapp/pagehierarchy/Page3.jspx?MBI_ID=20)

| Country                | Most recent year of data |      | Other years of data: NEET                                        |
|------------------------|--------------------------|------|------------------------------------------------------------------|
|                        | Child Marriage           | NEET |                                                                  |
| Afghanistan            | 2015                     | -    |                                                                  |
| Albania                | 2008                     | 2013 | 2008;2011;2012                                                   |
| Algeria                | 2012                     | 2015 | 2009;2010;2011;2012;2013;2014                                    |
| American Samoa         | -                        | -    |                                                                  |
| Andorra                | -                        | -    |                                                                  |
| Angola                 | 2015                     | 2011 | 2004                                                             |
| Antigua and Barbuda    | -                        | -    |                                                                  |
| Argentina              | -                        | 2014 | 2004;2005;2006;2008;2009;2010;2011;2012;2013                     |
| Armenia                | 2015                     | 2015 | 2011;2012;2013;2014                                              |
| Australia              | -                        | 2015 | 2009;2010;2011;2012;2013;2014                                    |
| Austria                | -                        | 2016 | 2004;2005;2006;2007;2008;2009;2010;2011;2012;2013;2014;2015      |
| Azerbaijan             | 2011                     | -    |                                                                  |
| Bahrain                | -                        | -    |                                                                  |
| Bangladesh             | 2014                     | 2015 | 2005;2010;2013                                                   |
| Barbados               | 2012                     | -    |                                                                  |
| Belarus                | 2012                     | 2009 |                                                                  |
| Belgium                | -                        | 2016 | 2004;2005;2006;2007;2008;2009;2010;2011;2012;2013;2014;2015      |
| Belize                 | 2015                     | 2016 | 2010;2012;2015                                                   |
| Benin                  | 2014                     | 2012 | 2010;2011                                                        |
| Bermuda                | -                        | 2010 |                                                                  |
| Bhutan                 | 2010                     | -    |                                                                  |
| Bolivia                | 2008                     | 2015 | 2005;2006;2007;2008;2009;2011;2012;2013;2014                     |
| Bosnia and Herzegovina | 2012                     | 2016 | 2014;2015                                                        |
| Botswana               | -                        | 2009 |                                                                  |
| Brazil                 | 2006                     | 2016 | 2009;2011;2012;2013;2014;2015                                    |
| Brunei                 | -                        | 2014 |                                                                  |
| Bulgaria               | -                        | 2016 | 2003;2004;2005;2006;2007;2008;2009;2010;2011;2012;2013;2014;2015 |
| Burkina Faso           | 2010                     | -    |                                                                  |
| Burundi                | 2010                     | 2014 |                                                                  |
| Cambodia               | 2014                     | 2012 | 2008;2009                                                        |
| Cameroon               | 2014                     | 2010 | 2007                                                             |

|                                  |      |      |                                                                                     |
|----------------------------------|------|------|-------------------------------------------------------------------------------------|
| Canada                           | -    | 2016 | 2000;2001;2002;2003;2004;2005;2006;2007;<br>2008;2009;2010;2011;2012;2013;2014;2015 |
| Cape Verde                       | 2005 | -    |                                                                                     |
| Central African Republic         | 2010 | -    |                                                                                     |
| Chad                             | 2014 | -    |                                                                                     |
| Chile                            | -    | 2014 | 2010;2011;2012;2013                                                                 |
| China                            | -    | -    |                                                                                     |
| Colombia                         | 2015 | 2016 | 2003;2005;2009;2010;2011;2012;2013;2014;<br>2015                                    |
| Comoros                          | 2012 | 2004 |                                                                                     |
| Congo                            | 2011 | 2005 |                                                                                     |
| Costa Rica                       | 2011 | 2016 | 2010;2011;2012;2013;2014;2015                                                       |
| Cote d'Ivoire                    | 2011 | -    |                                                                                     |
| Croatia                          | -    | 2016 | 2005;2006;2007;2008;2009;2010;2011;2012;<br>2013;2014;2015                          |
| Cuba                             | 2014 | -    |                                                                                     |
| Cyprus                           | -    | 2016 | 2003;2004;2005;2006;2007;2008;2009;2010;<br>2011;2012;2013;2014;2015                |
| Czech Republic                   | -    | 2016 | 2003;2004;2005;2006;2007;2008;2009;2010;<br>2011;2012;2013;2014;2015                |
| Democratic Republic of the Congo | 2013 | -    |                                                                                     |
| Denmark                          | -    | 2016 | 2003;2004;2005;2006;2007;2008;2009;2010;<br>2011;2012;2013;2014;2015                |
| Djibouti                         | 2006 | -    |                                                                                     |
| Dominica                         | -    | -    |                                                                                     |
| Dominican Republic               | 2014 | 2015 | 2008;2009;2010;2011;2012;2013;2014                                                  |
| Ecuador                          | 2004 | 2016 | 2009;2010;2011;2012;2013;2014;2015                                                  |
| Egypt                            | 2014 | 2015 | 2011;2012;2013                                                                      |
| El Salvador                      | 2014 | 2015 | 2009;2010;2012;2013                                                                 |
| Equatorial Guinea                | 2011 | -    |                                                                                     |
| Eritrea                          | 2010 | -    |                                                                                     |
| Estonia                          | -    | 2016 | 2003;2004;2005;2006;2007;2008;2009;2010;<br>2011;2012;2013;2014;2015                |
| Ethiopia                         | 2016 | 2012 | 2011                                                                                |
| Federated States of Micronesia   | -    | -    |                                                                                     |
| Fiji                             | -    | 2014 |                                                                                     |
| Finland                          | -    | 2016 | 2003;2004;2005;2006;2007;2008;2009;2010;<br>2011;2012;2013;2014;2015                |
| France                           | -    | 2016 | 2003;2004;2005;2006;2007;2008;2009;2010;<br>2011;2012;2013;2014;2015                |
| Gabon                            | 2012 | -    |                                                                                     |
| Georgia                          | 2010 | -    |                                                                                     |
| Germany                          | -    | 2016 | 2003;2004;2005;2006;2007;2008;2009;2010;<br>2011;2012;2013;2014;2015                |
| Ghana                            | 2014 | 2013 |                                                                                     |



|               |      |      |                                                                      |
|---------------|------|------|----------------------------------------------------------------------|
|               |      |      | 2003;2004;2005;2006;2007;2008;2009;2010;<br>2011;2012;2013;2014;2015 |
| Greece        | -    | 2016 |                                                                      |
| Greenland     | -    | -    |                                                                      |
| Grenada       | -    | -    |                                                                      |
| Guam          | -    | -    |                                                                      |
| Guatemala     | 2014 | 2016 | 2011;2012;2013;2014;2015                                             |
| Guinea        | 2012 | 2002 |                                                                      |
| Guinea-Bissau | 2014 | -    |                                                                      |
| Guyana        | 2014 | -    |                                                                      |
| Haiti         | 2012 | -    |                                                                      |
| Honduras      | 2012 | 2016 | 2007;2009;2010;2012;2013;2014;2015                                   |
|               |      |      | 2004;2005;2006;2007;2008;2009;2010;2011;<br>2012;2013;2014;2015      |
| Hungary       | -    | 2016 |                                                                      |
|               |      |      | 2003;2004;2005;2006;2007;2008;2009;2010;<br>2011;2012;2013;2014;2015 |
| Iceland       | -    | 2016 |                                                                      |
| India         | 2005 | 2010 | 2004                                                                 |
| Indonesia     | 2013 | 2016 | 2008;2009;2010;2013;2015                                             |
| Iran          | 2010 | 2010 | 2009                                                                 |
| Iraq          | 2011 | -    |                                                                      |
|               |      |      | 2003;2004;2005;2006;2007;2008;2009;2010;<br>2011;2012;2013;2014;2015 |
| Ireland       | -    | 2016 |                                                                      |
| Israel        | -    | 2016 | 2009;2010;2011;2012;2013;2014;2015                                   |
|               |      |      | 2004;2005;2006;2007;2008;2009;2010;2011;<br>2012;2013;2014;2015      |
| Italy         | -    | 2016 |                                                                      |
| Jamaica       | 2011 | -    |                                                                      |
| Japan         | -    | 2016 | 2009;2010;2012;2013;2014;2015                                        |
| Jordan        | 2012 | -    |                                                                      |
| Kazakhstan    | 2015 | -    |                                                                      |
| Kenya         | 2014 | -    |                                                                      |
| Kiribati      | 2009 | -    |                                                                      |
| Kuwait        | -    | -    |                                                                      |
| Kyrgyzstan    | 2014 | 2016 | 2009;2010;2011;2012;2013;2014;2015                                   |
|               |      |      |                                                                      |
| Laos          | 2011 | 2010 |                                                                      |
|               |      |      | 2003;2004;2005;2006;2007;2008;2009;2010;<br>2011;2012;2013;2014;2015 |
| Latvia        | -    | 2016 |                                                                      |
| Lebanon       | 2009 | 2007 |                                                                      |
| Lesotho       | 2014 | -    |                                                                      |
| Liberia       | 2013 | 2010 |                                                                      |
|               |      |      |                                                                      |
| Libya         | -    | -    |                                                                      |
|               |      |      | 2004;2005;2006;2007;2008;2009;2010;2011;<br>2012;2013;2014;2015      |
| Lithuania     | -    | 2016 |                                                                      |
|               |      |      | 2003;2004;2005;2006;2007;2008;2009;2010;<br>2011;2012;2013;2014;2015 |
| Luxembourg    | -    | 2016 |                                                                      |
|               |      |      | 2006;2007;2008;2009;2010;2011;2012;2013;<br>2014;2015                |
| Macedonia     | 2011 | 2016 |                                                                      |
| Madagascar    | 2012 | 2012 |                                                                      |
| Malawi        | 2015 | -    |                                                                      |

|                          |      |      |                                                                           |
|--------------------------|------|------|---------------------------------------------------------------------------|
| Malaysia                 | -    | 2015 | 2013;2014                                                                 |
| Maldives                 | 2009 | 2014 | 2010                                                                      |
| Mali                     | 2015 | 2015 | 2010;2014                                                                 |
| Malta                    | -    | 2016 | 2004;2005;2006;2007;2008;2009;2010;2011;<br>2012;2013;2014;2015           |
| Marshall Islands         | 2007 | -    |                                                                           |
| Mauritania               | 2011 | -    |                                                                           |
| Mauritius                | -    | -    |                                                                           |
| Mexico                   | 2015 | 2016 | 2005;2006;2007;2008;2009;2010;2011;2012;<br>2013;2014;2015                |
| Moldova                  | 2012 | 2015 | 2009;2010;2011;2012;2013;2014<br>2006;2008;2009;2010;2011;2012;2013;2014; |
| Mongolia                 | 2013 | 2016 | 2015                                                                      |
| Montenegro               | 2013 | 2015 |                                                                           |
| Morocco                  | 2003 | -    |                                                                           |
| Mozambique               | 2011 | 2012 |                                                                           |
| Myanmar                  | 2015 | 2015 |                                                                           |
| Namibia                  | 2013 | 2016 | 2014                                                                      |
| Nepal                    | 2014 | 2008 |                                                                           |
| Netherlands              | -    | 2016 | 2003;2004;2005;2006;2007;2008;2009;2010;<br>2011;2012;2013;2014;2015      |
| New Zealand              | -    | 2016 | 2007;2008;2009;2010;2011;2012;2013;2014;<br>2015                          |
| Nicaragua                | 2006 | 2014 |                                                                           |
| Niger                    | 2012 | 2011 |                                                                           |
| Nigeria                  | 2017 | 2013 |                                                                           |
| North Korea              | -    | -    |                                                                           |
| Northern Mariana Islands | -    | -    |                                                                           |
| Norway                   | -    | 2016 | 2003;2004;2005;2006;2007;2008;2009;2010;<br>2011;2012;2013;2014;2015      |
| Oman                     | -    | -    |                                                                           |
| Pakistan                 | 2012 | 2015 | 2010;2011;2013;2014                                                       |
| Palestine                | 2014 | 2015 | 2011;2012;2013                                                            |
| Panama                   | 2013 | 2016 | 2009;2010;2011;2012;2014                                                  |
| Papua New Guinea         | 2006 | 2010 |                                                                           |
| Paraguay                 | 2016 | 2015 | 2009;2010;2011;2012;2013;2014                                             |
| Peru                     | 2015 | 2015 | 2004;2005;2006;2007;2008;2009;2010;2011;<br>2012;2013;2014                |
| Philippines              | 2013 | 2016 | 2009;2010;2011;2012;2014;2015                                             |
| Poland                   | -    | 2016 | 2004;2005;2006;2007;2008;2009;2010;2011;<br>2012;2013;2014;2015           |
| Portugal                 | -    | 2016 | 2004;2005;2006;2007;2008;2009;2010;2011;<br>2012;2013;2014;2015           |
| Puerto Rico              | -    | -    |                                                                           |
| Qatar                    | 2012 | 2016 | 2009                                                                      |

|                                     |      |      |                                                                      |
|-------------------------------------|------|------|----------------------------------------------------------------------|
| Romania                             | -    | 2016 | 2003;2004;2005;2006;2007;2008;2009;2010;<br>2011;2012;2013;2014;2015 |
| Russia                              | -    | 2015 | 2009;2010;2011;2012;2013;2014                                        |
| Rwanda                              | 2014 | -    |                                                                      |
| Saint Lucia                         | 2012 | -    |                                                                      |
| Saint Vincent and<br>the Grenadines | -    | -    |                                                                      |
| Samoa                               | 2014 | 2012 |                                                                      |
| Sao Tome and<br>Principe            | 2014 | -    |                                                                      |
| Saudi Arabia                        | -    | 2015 | 2009;2011;2012;2013;2014                                             |
| Senegal                             | 2015 | -    |                                                                      |
| Serbia                              | 2014 | 2016 | 2009;2010;2011;2012;2013;2014;2015                                   |
| Seychelles                          | -    | -    |                                                                      |
| Sierra Leone                        | 2013 | 2014 |                                                                      |
| Singapore                           | -    | 2014 |                                                                      |
| Slovakia                            | -    | 2016 | 2003;2004;2005;2006;2007;2008;2009;2010;<br>2011;2012;2013;2014;2015 |
| Slovenia                            | -    | 2016 | 2003;2004;2005;2006;2007;2008;2009;2010;<br>2011;2012;2013;2014;2015 |
| Solomon Islands                     | 2015 | -    |                                                                      |
| Somalia                             | 2006 | -    |                                                                      |
| South Africa                        | 2003 | 2016 | 2013;2014;2015                                                       |
| South Korea                         | -    | -    |                                                                      |
| South Sudan                         | 2010 | -    |                                                                      |
| Spain                               | -    | 2016 | 2003;2004;2005;2006;2007;2008;2009;2010;<br>2011;2012;2013;2014;2015 |
| Sri Lanka                           | 2006 | 2014 | 2010;2013                                                            |
| Sudan                               | 2014 | -    |                                                                      |
| Suriname                            | 2010 | -    |                                                                      |
| Swaziland                           | 2014 | -    |                                                                      |
| Sweden                              | -    | 2016 | 2003;2004;2005;2006;2007;2008;2009;2010;<br>2011;2012;2013;2014;2015 |
| Switzerland                         | -    | 2016 | 2003;2004;2005;2006;2007;2008;2009;2010;<br>2011;2012;2013;2014;2015 |
| Syria                               | 2006 | -    |                                                                      |
| Taiwan                              | -    | -    |                                                                      |
| Tajikistan                          | 2012 | -    |                                                                      |
| Tanzania                            | 2015 | 2014 | 2005                                                                 |
| Thailand                            | 2015 | 2016 | 2009;2010;2011;2012;2013;2014;2015                                   |
| The Bahamas                         | -    | -    |                                                                      |
| The Gambia                          | 2013 | 2012 |                                                                      |
| Timor-Leste                         | 2009 | 2013 | 2010                                                                 |
| Togo                                | 2013 | 2011 |                                                                      |
| Tonga                               | 2012 | -    |                                                                      |
| Trinidad and<br>Tobago              | 2006 | 2013 |                                                                      |

|                      |      |      |                                                                 |
|----------------------|------|------|-----------------------------------------------------------------|
| Tunisia              | 2011 | -    |                                                                 |
| Turkey               | 2013 | 2016 | 2006;2007;2008;2009;2010;2011;2012;2013;<br>2014;2015           |
| Turkmenistan         | 2015 | -    |                                                                 |
| Uganda               | 2011 | 2013 | 2005;2009;2012                                                  |
| Ukraine              | 2012 | 2015 | 2014                                                            |
| United Arab Emirates | -    | -    |                                                                 |
| United Kingdom       | -    | 2016 | 2004;2005;2006;2007;2008;2009;2010;2011;<br>2012;2013;2014;2015 |
| United States        | -    | 2012 | 2009;2010;2011                                                  |
| Uruguay              | 2013 | 2016 | 2009;2010;2011;2012;2013;2014;2015                              |
| Uzbekistan           | 2006 | -    |                                                                 |
| Vanuatu              | 2013 | -    |                                                                 |
| Venezuela            | -    | 2010 | 2009                                                            |
| Vietnam              | 2014 | 2016 | 2012;2013;2014;2015                                             |
| Virgin Islands, U.S. | -    | -    |                                                                 |
| Yemen                | 2013 | 2014 |                                                                 |
| Zambia               | 2013 | 2008 |                                                                 |
| Zimbabwe             | 2015 | -    |                                                                 |

Appendix 3 – Uncertainty bounds for indicators:

Appendix 2.1 DALYs per 100 000 population due to group one conditions in 10 - 24 year olds

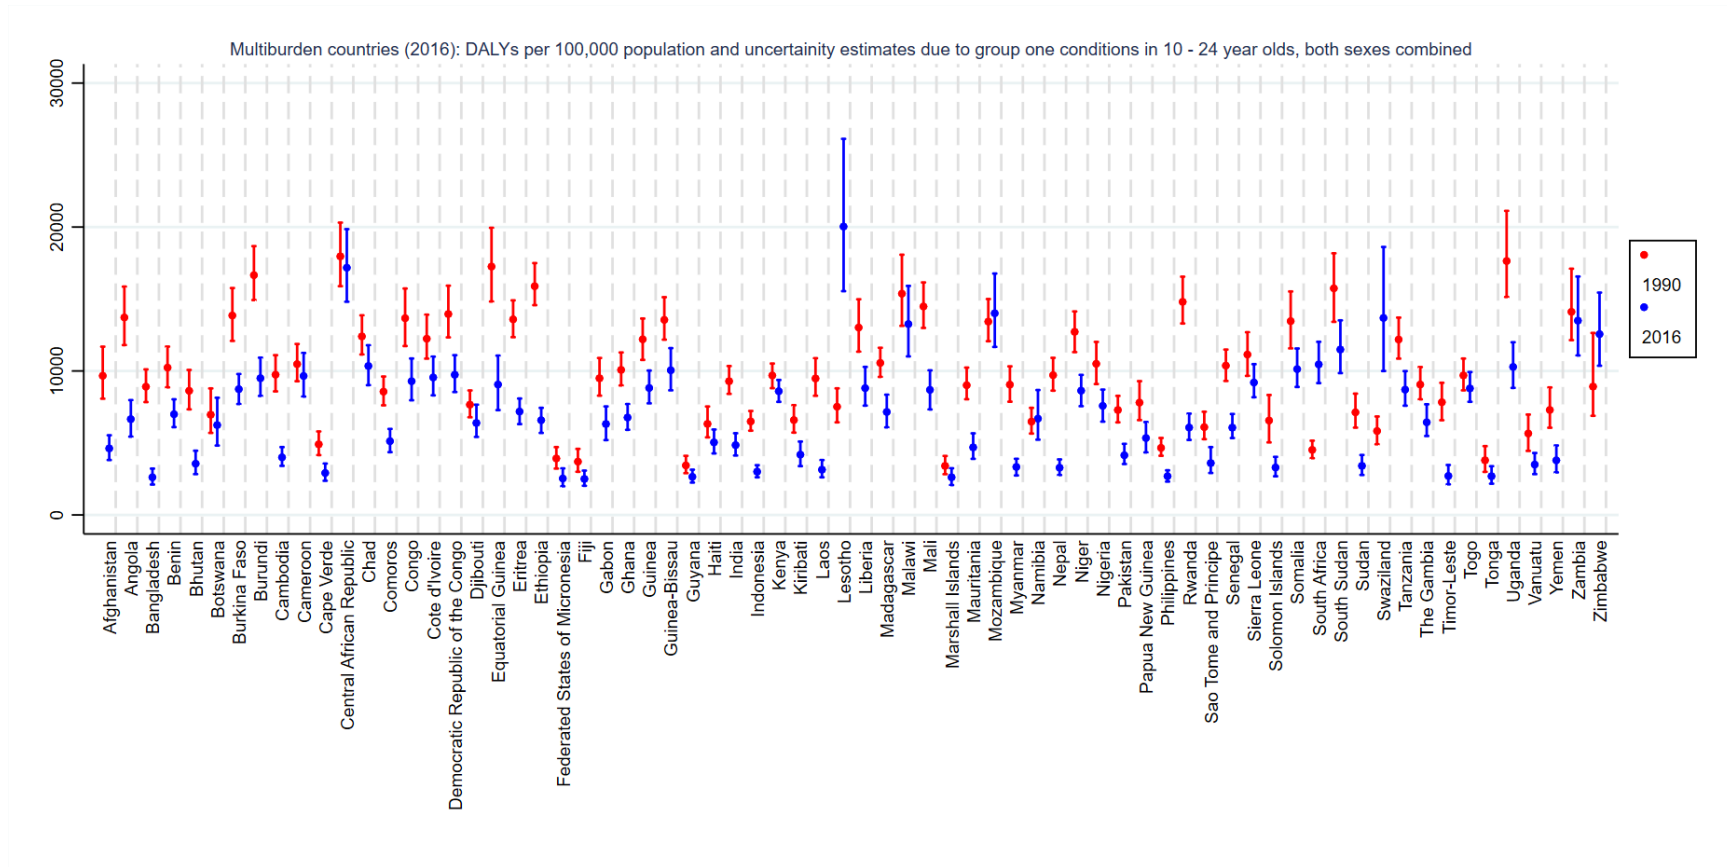

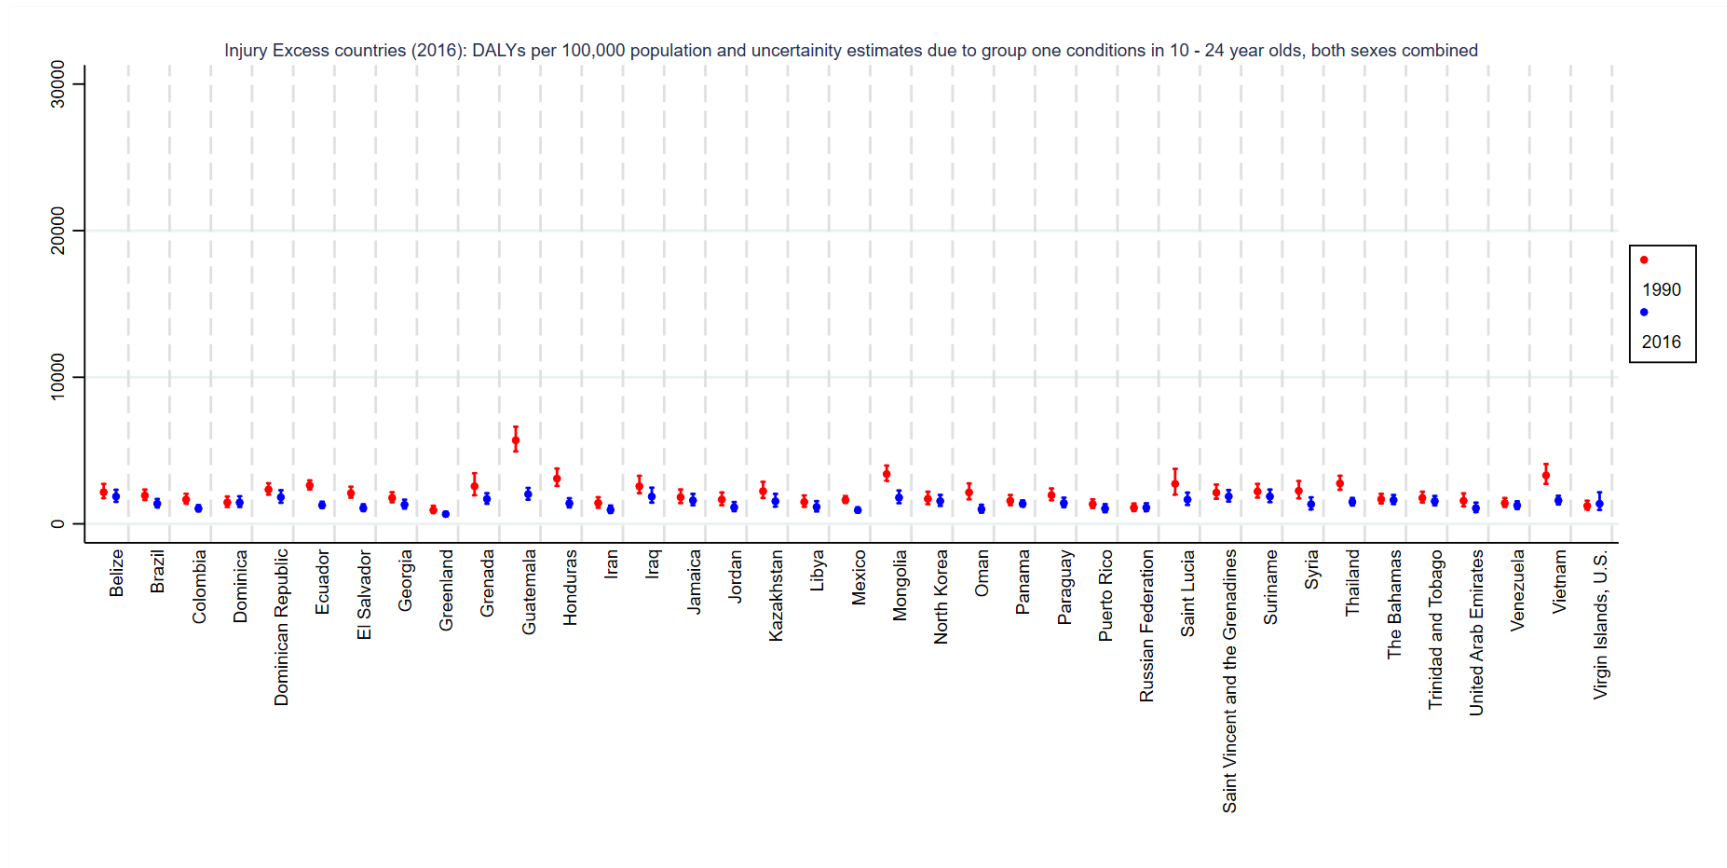

NCD predominant countries (2016): DALYs per 100,000 population and uncertainty estimates due to group one conditions in 10 - 24 year olds

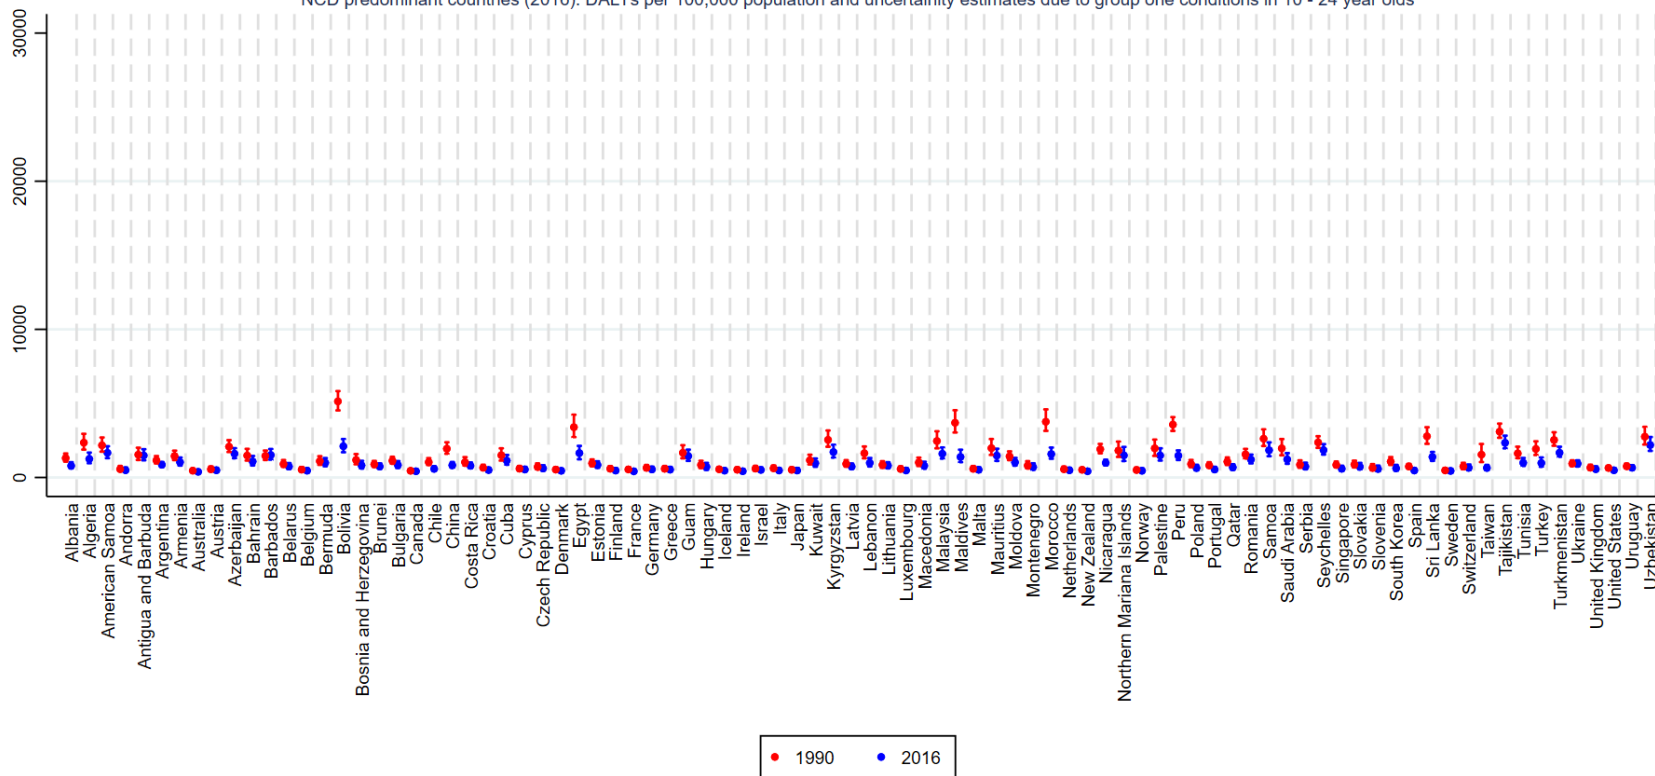

## Appendix 2.2 DALYs per 100 000 population due to injury and violence in 10 - 24 year olds

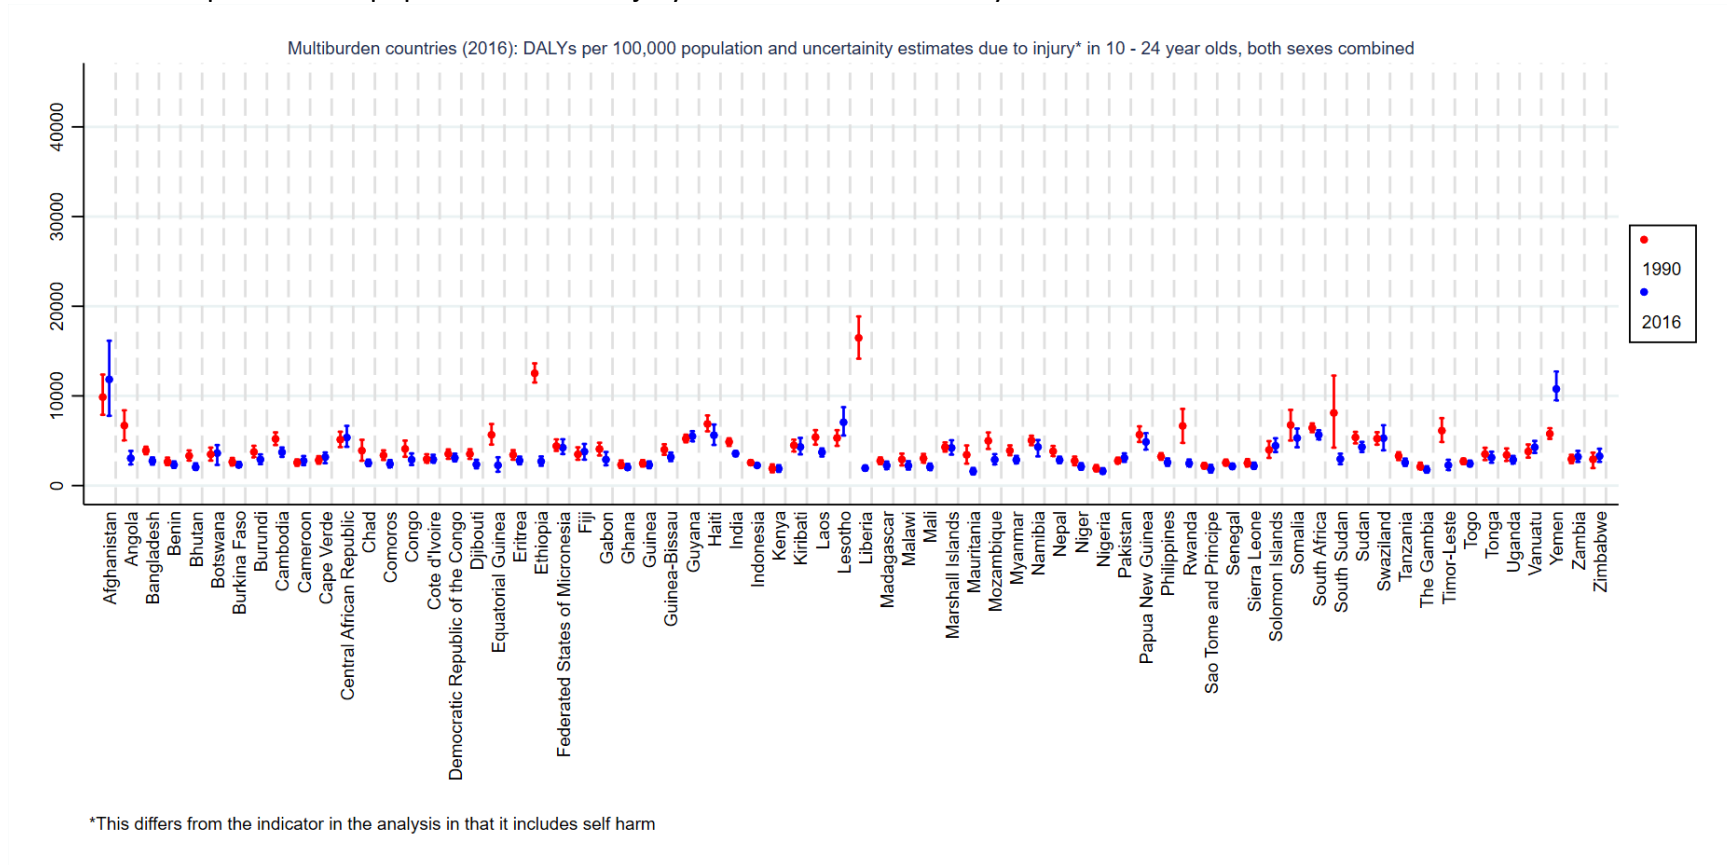



Injury Excess countries (2016): DALYs per 100,000 population and uncertainty estimates due to injury\* and violence in 10 - 24 year olds, both sexes combined

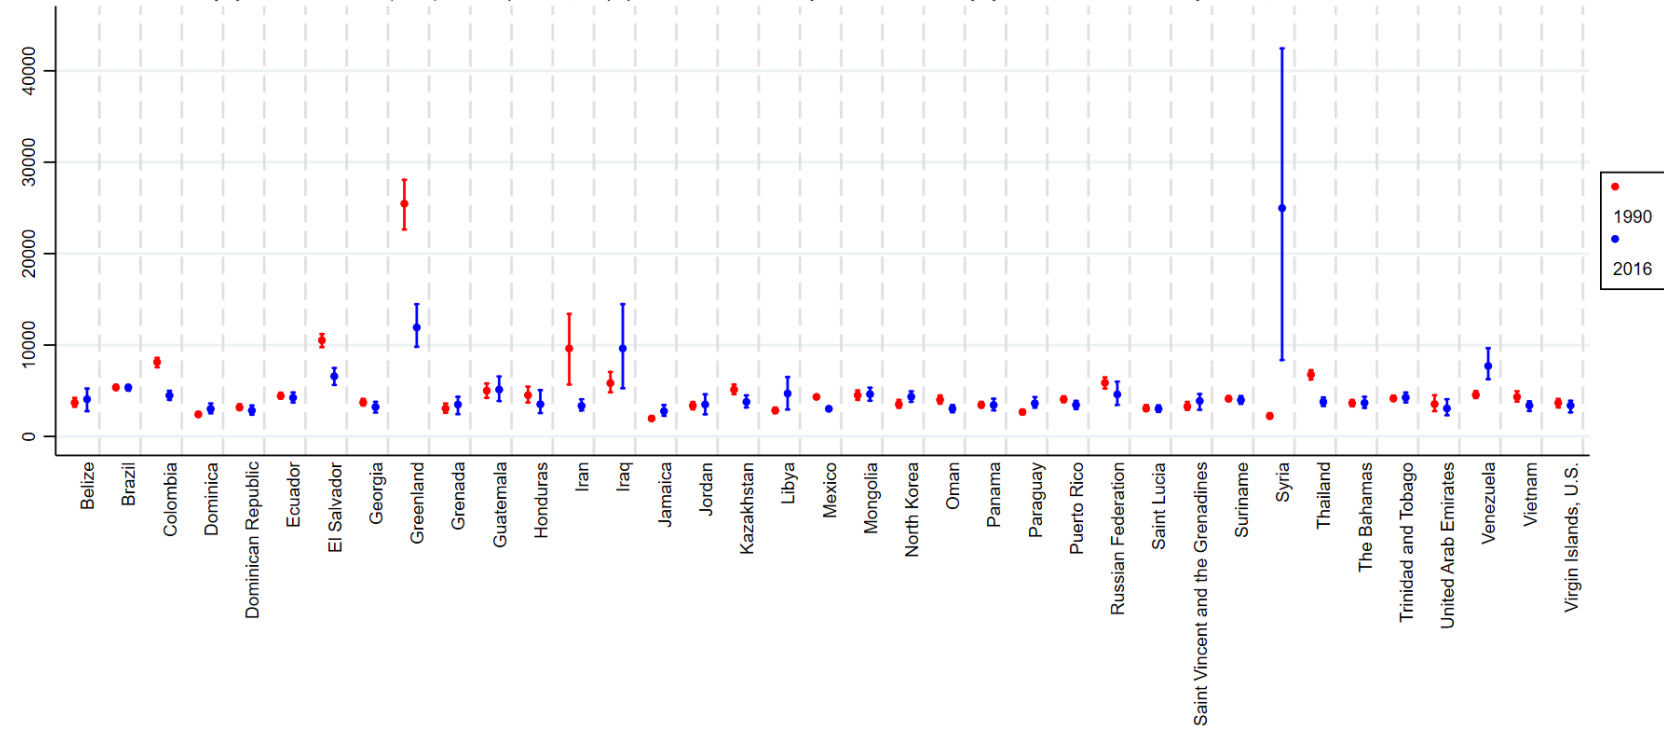

\*This differs from the indicator in the paper as it includes self harm

NCD predominant countries (2016): DALYs per 100,000 population and uncertainty estimates due to injury\* and violence in 10 - 24 year olds, both sexes combined

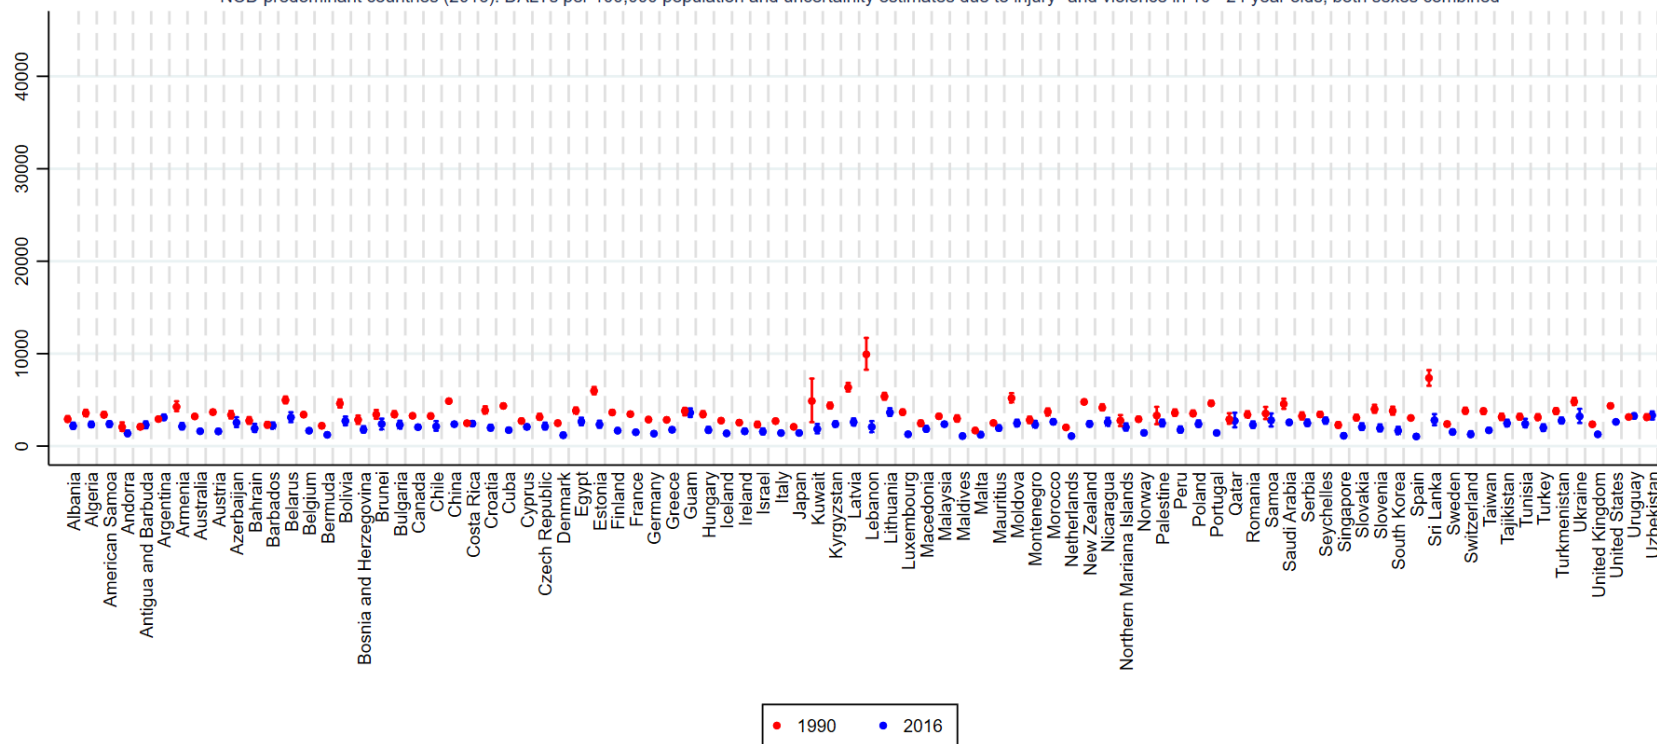

\*This differs from the indicator in the paper as it includes self harm

### Appendix 2.3 DALYs per 100 000 population due to non-communicable diseases in 10 - 24 year olds

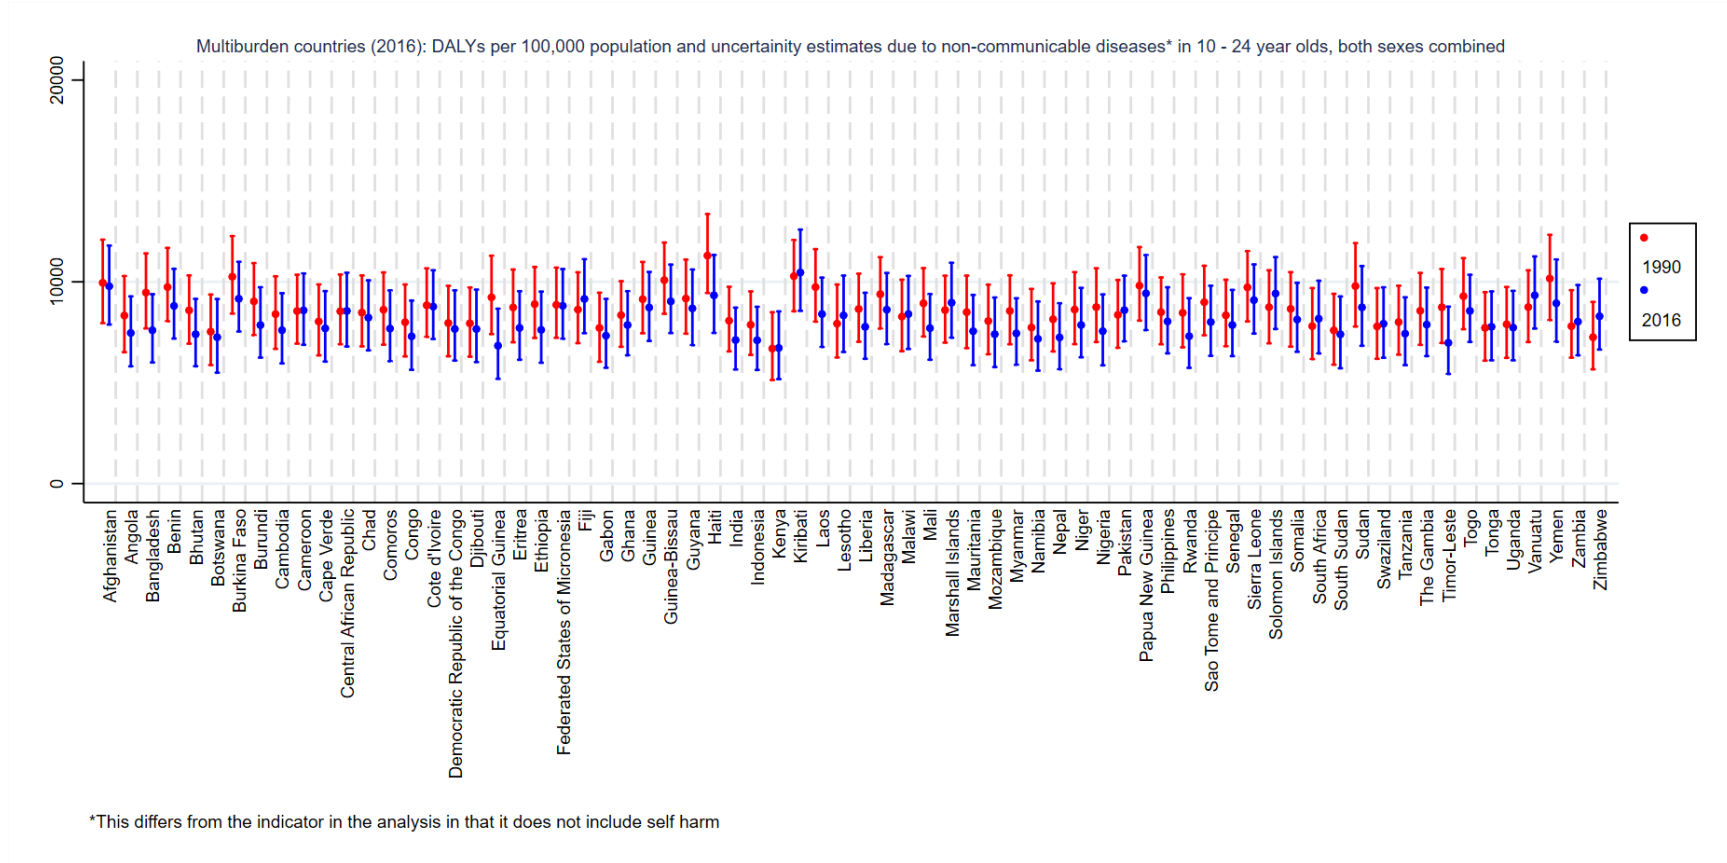

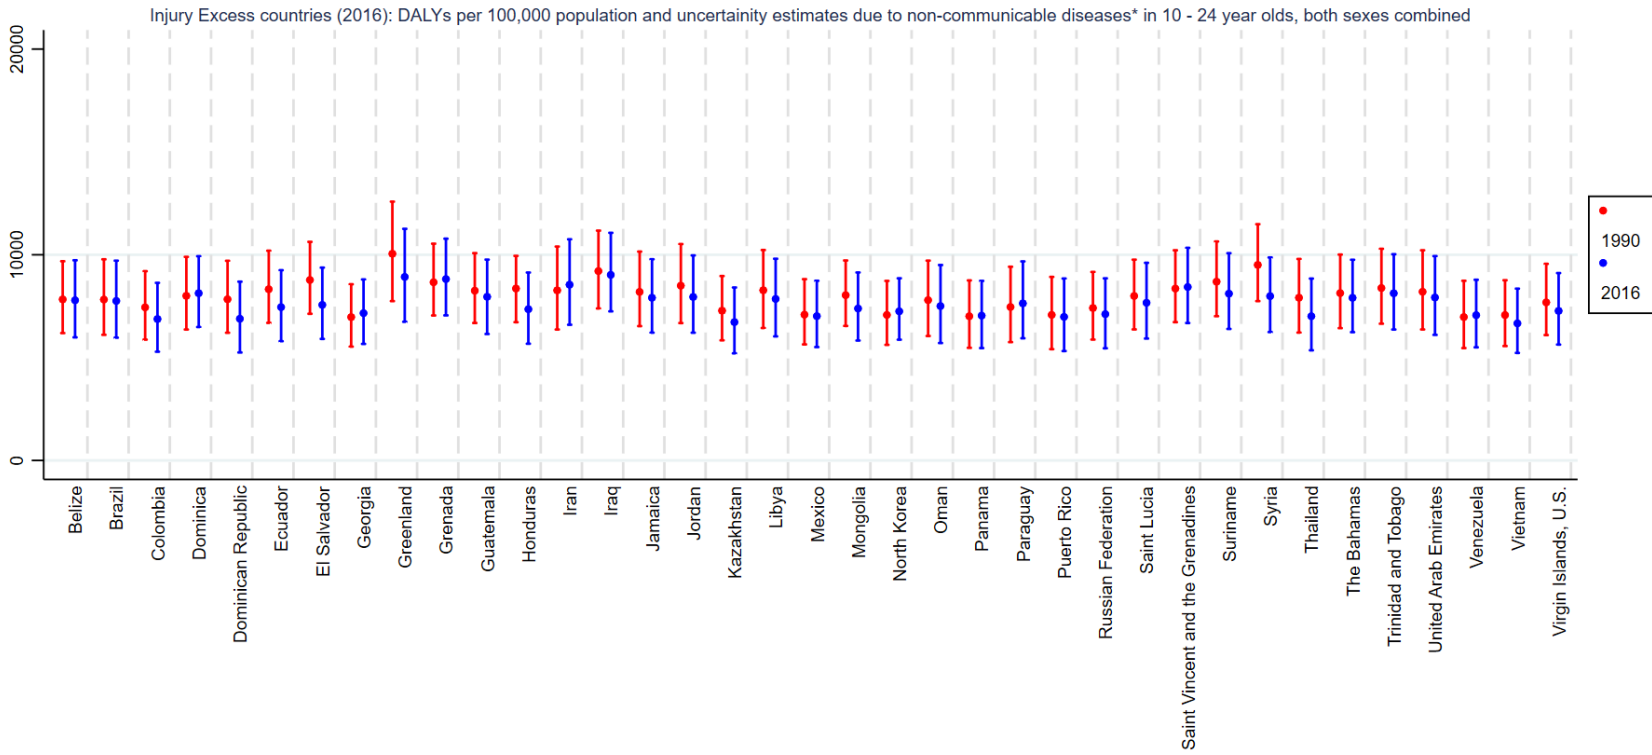

\*This differs from the indicator in the paper as it does not include self harm

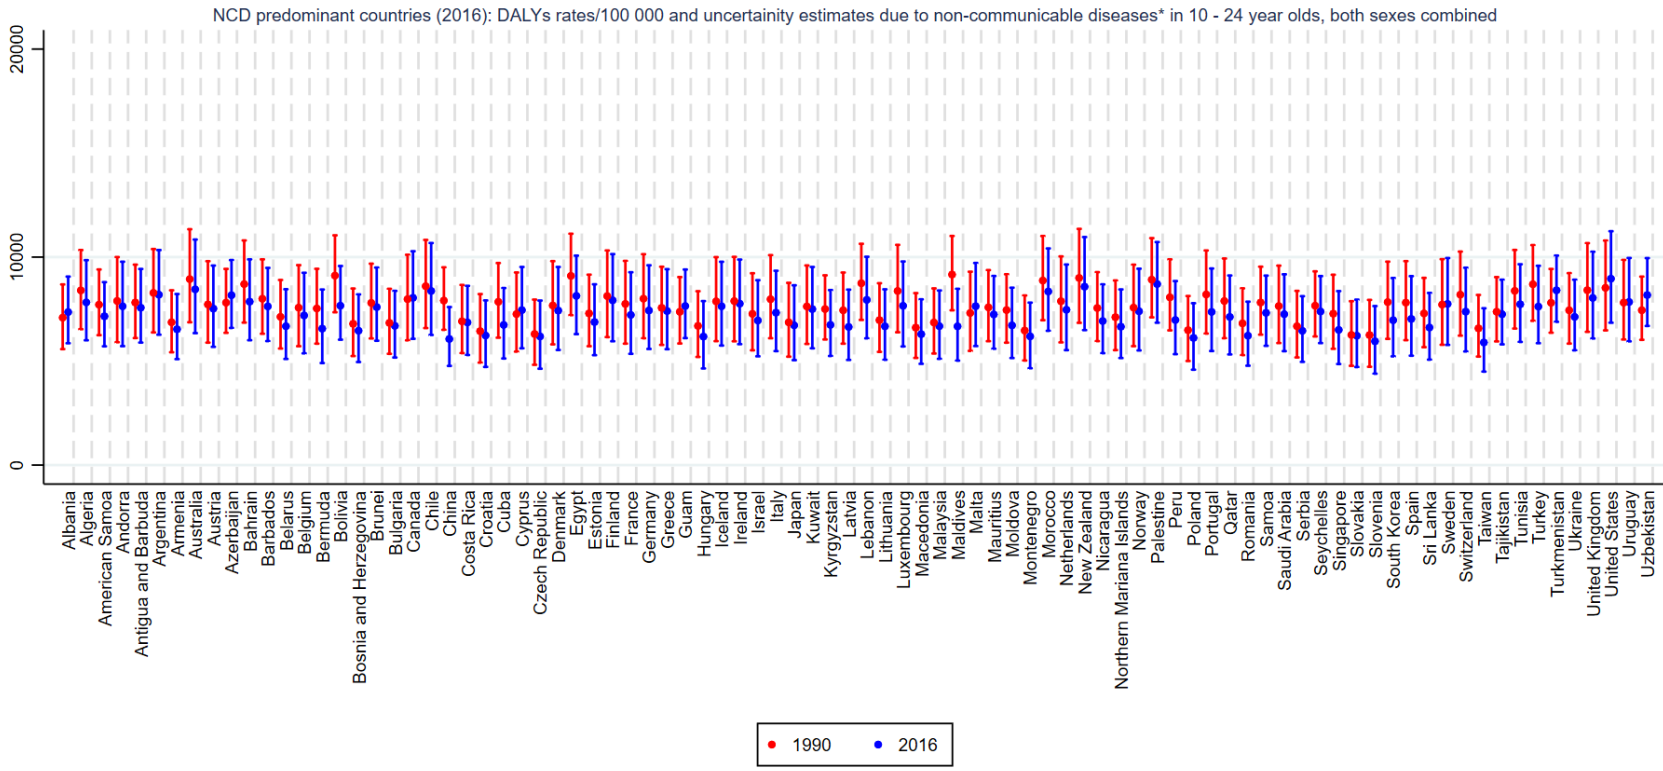

\*This differs from the indicator in the paper as it does not include self harm

### Appendix 2.4 DALYs per 100 000 population due to self harm in 10 - 24 year olds

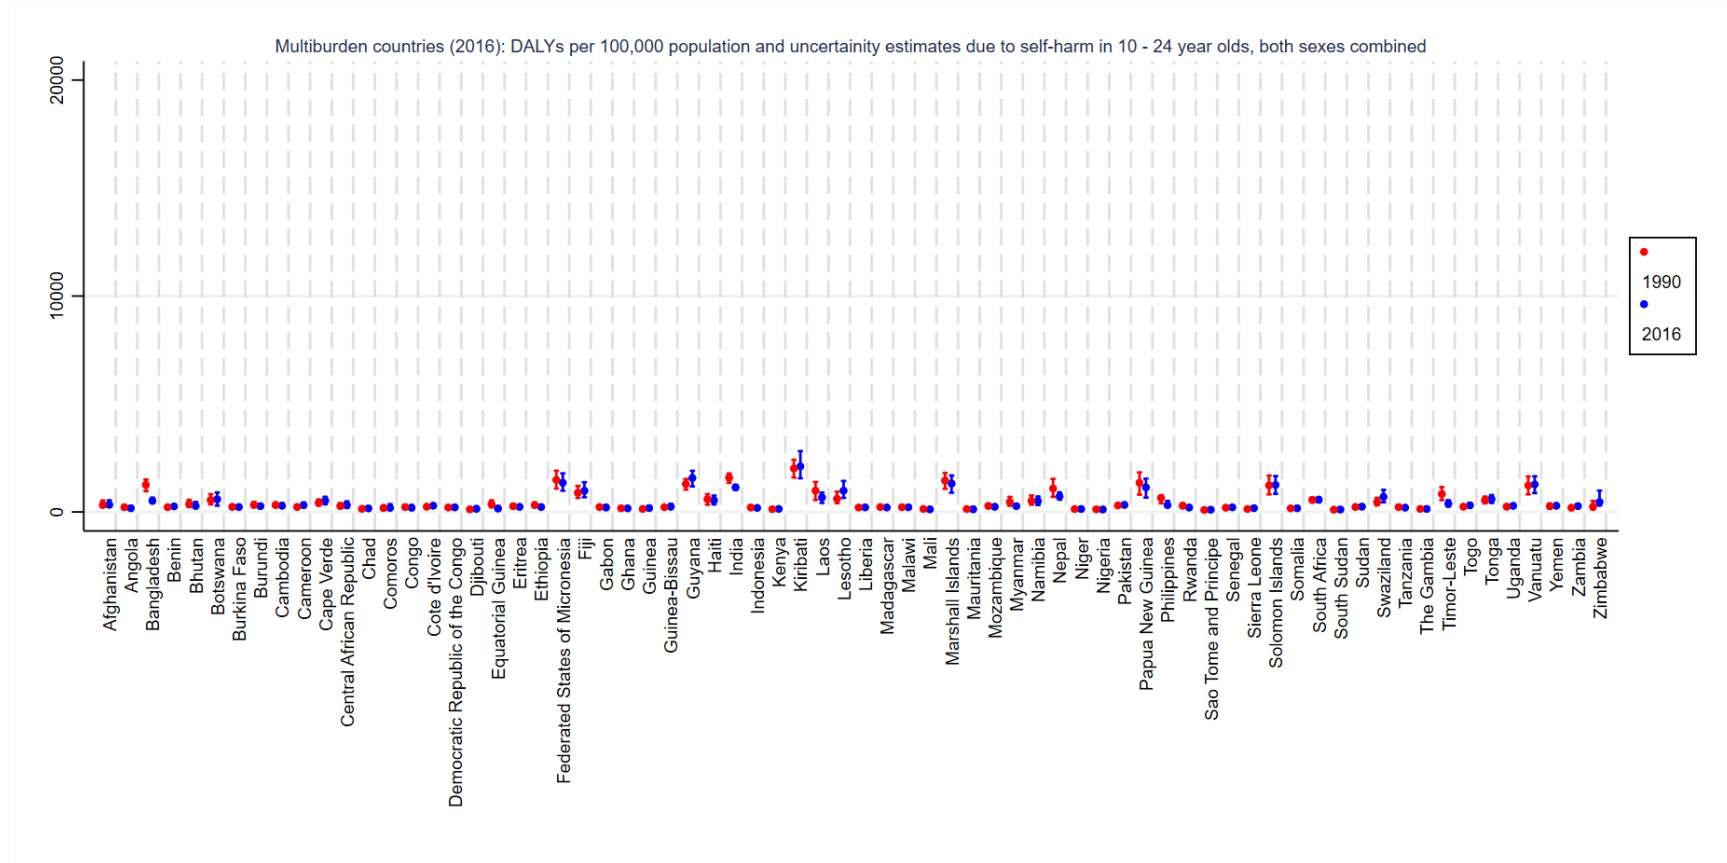

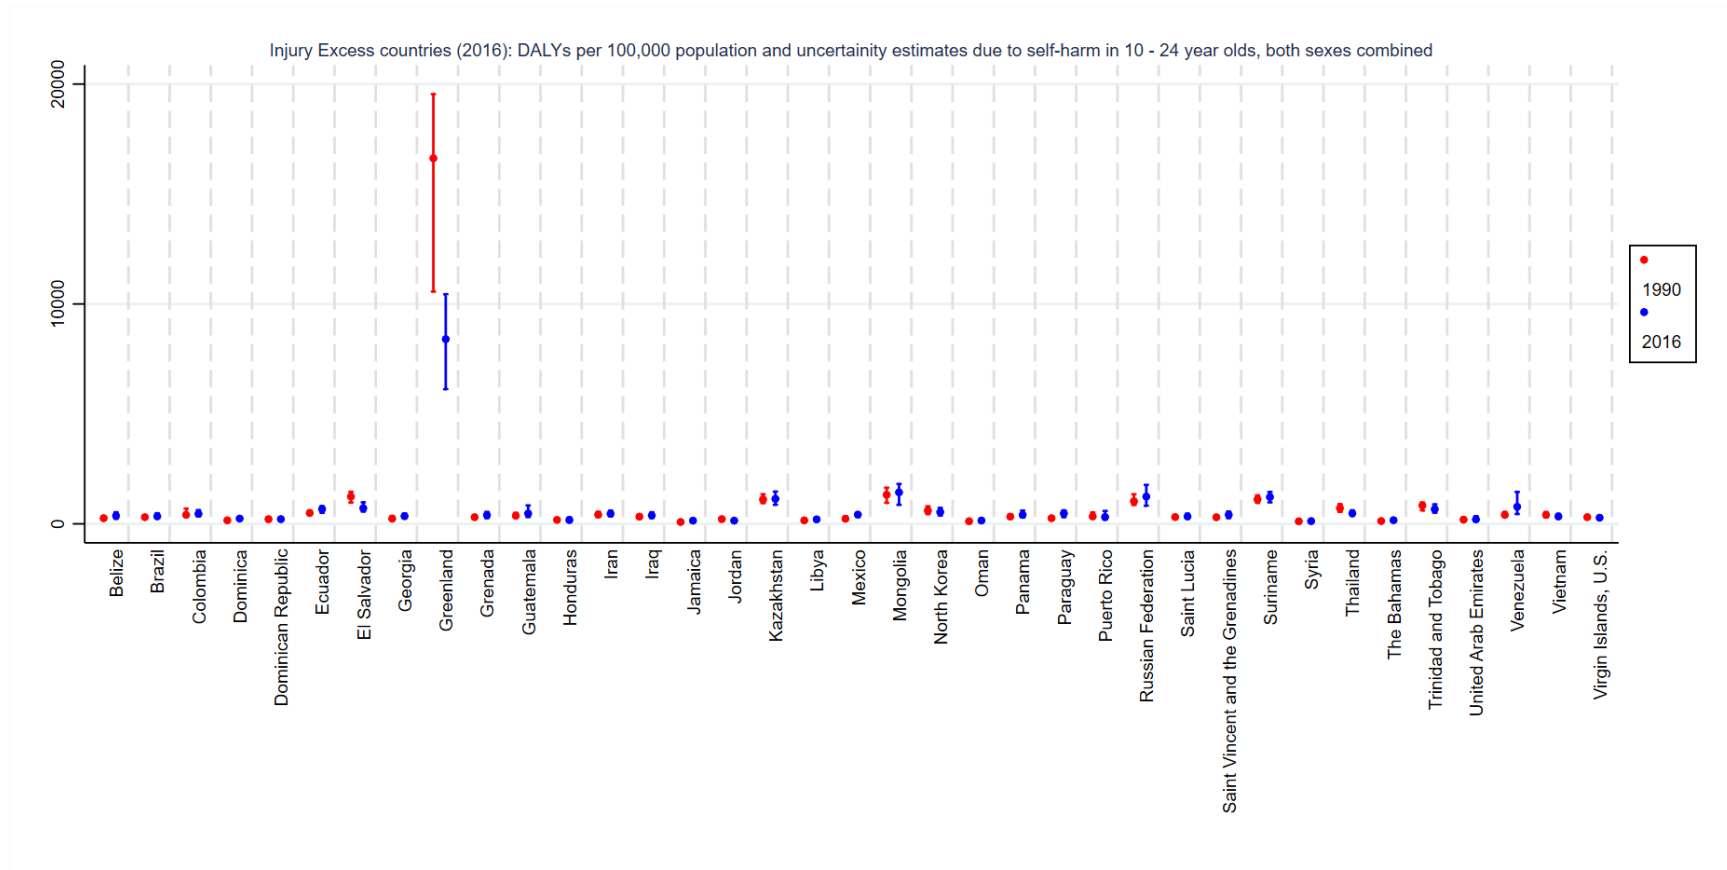

NCD predominant countries (2016): DALYs per 100,000 population and uncertainty estimates due to self-harm in 10 - 24 year olds, both sexes combined

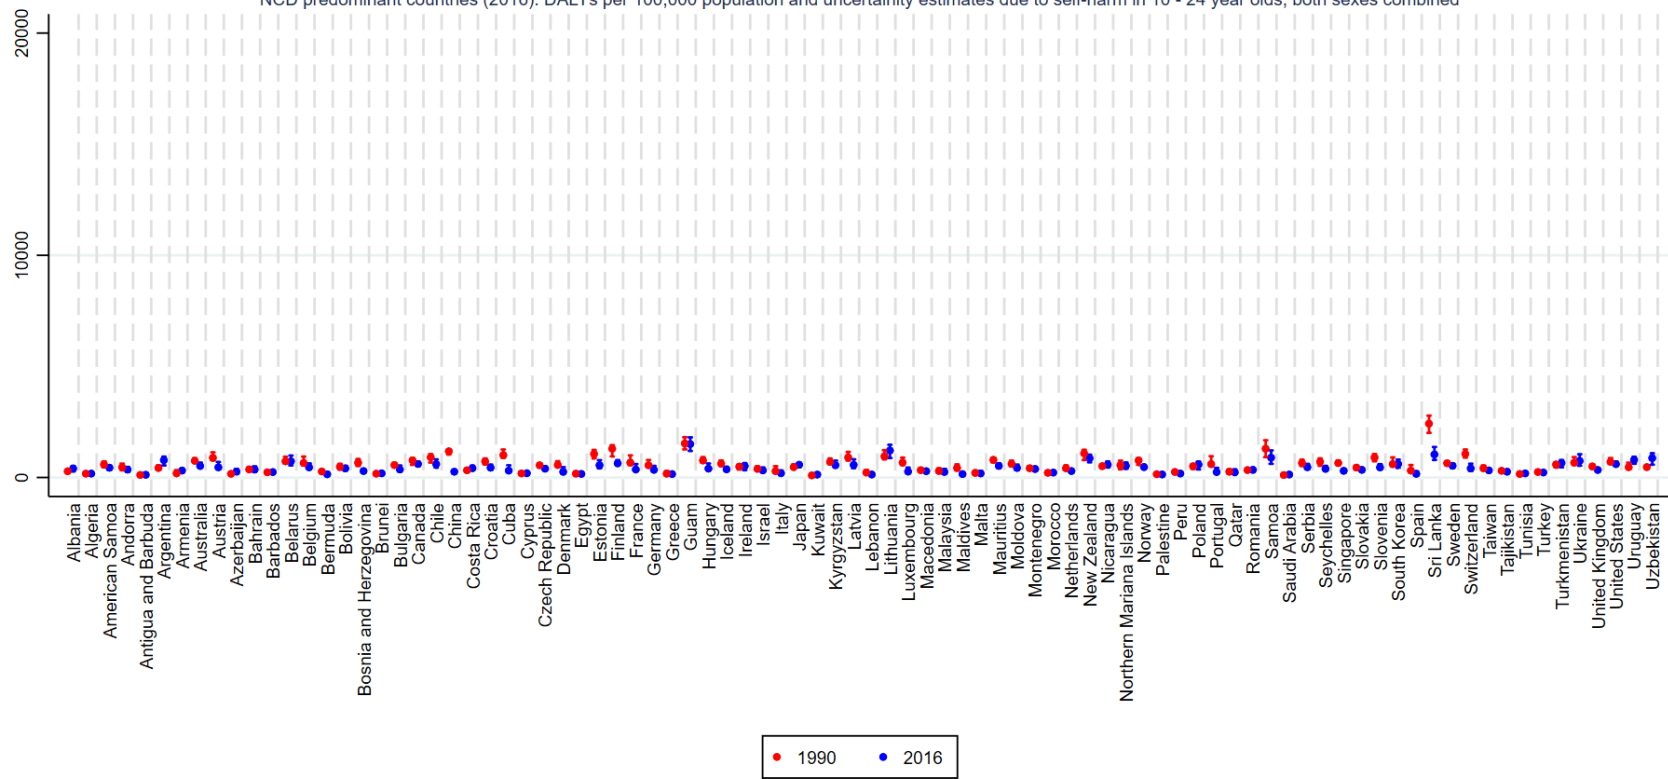



## Appendix 2.5 Total DALYs per 100 000 population due to all causes in 10 - 24 year olds

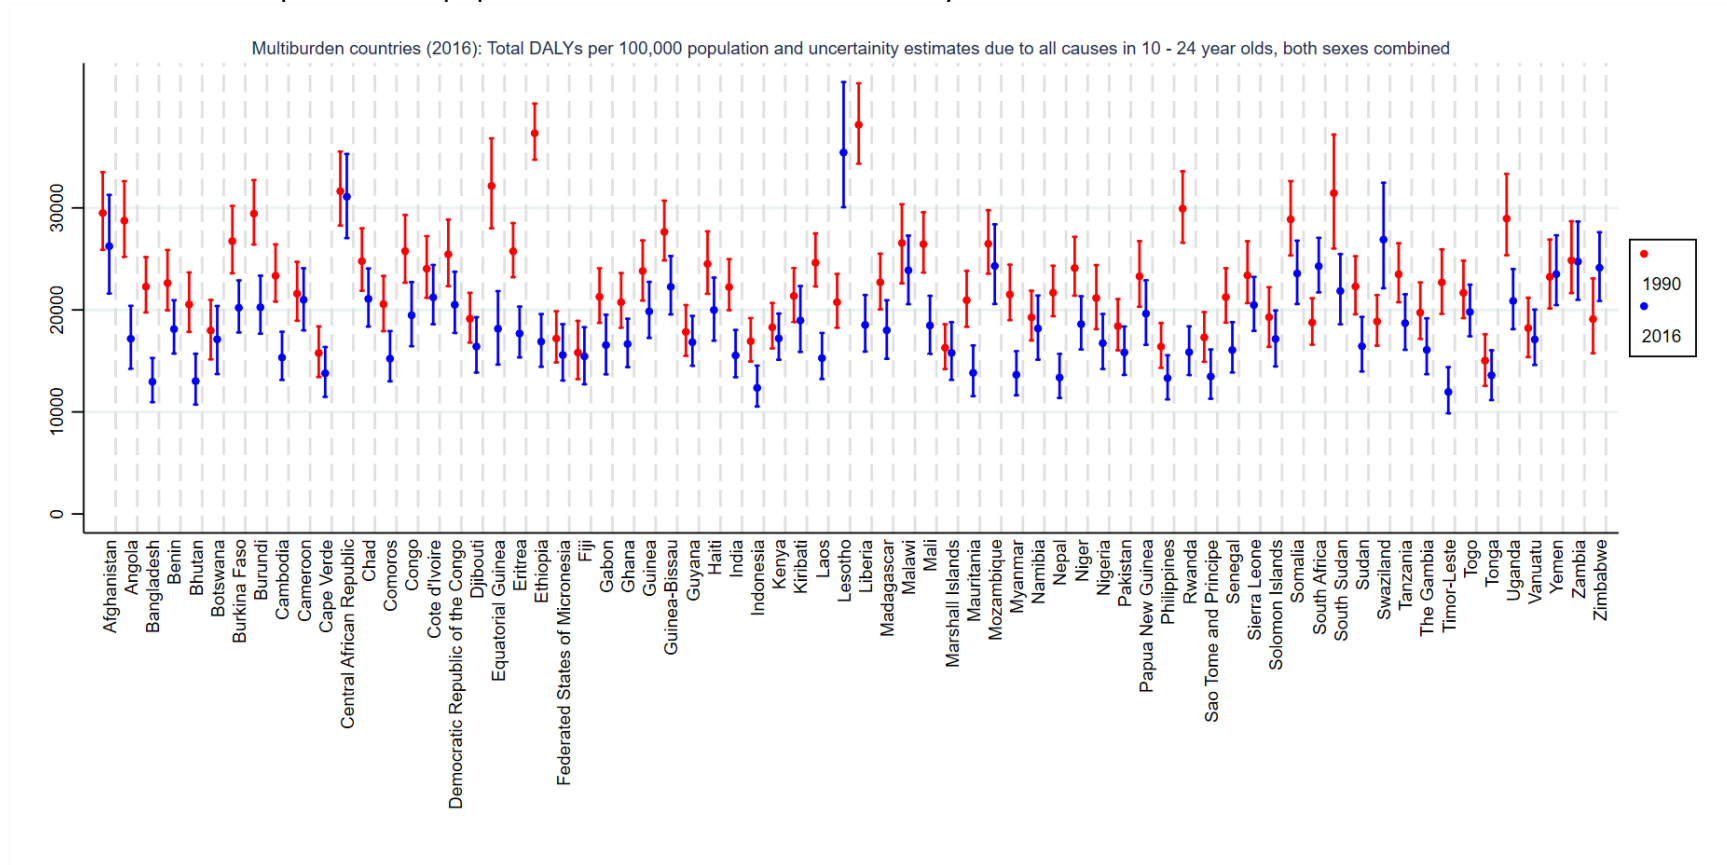

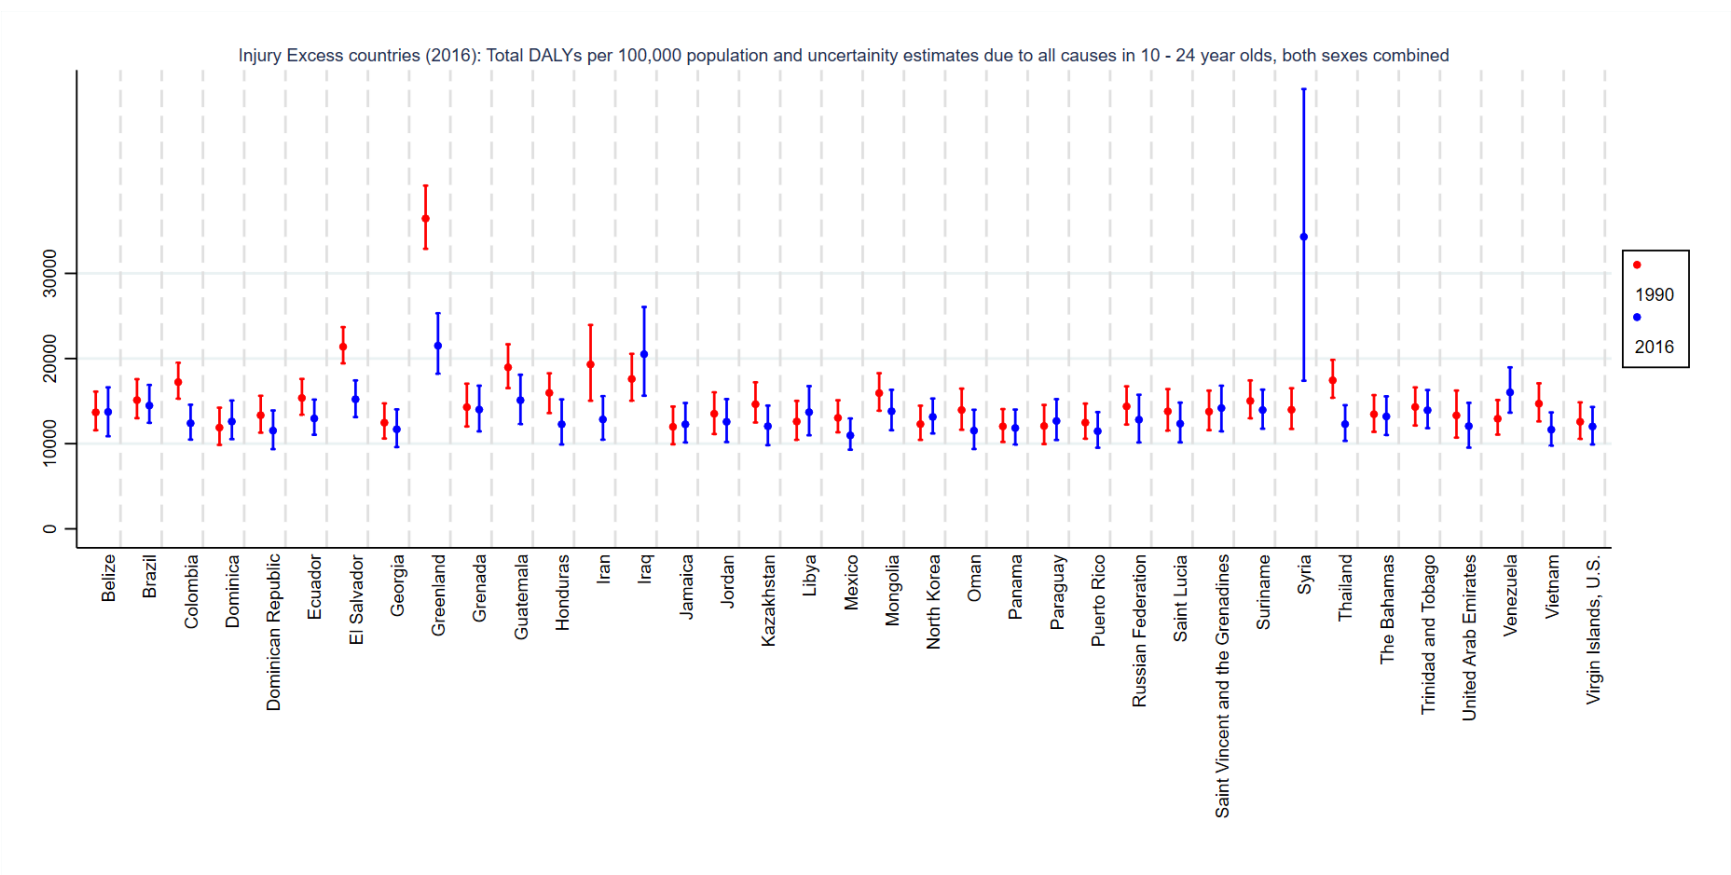

NCD predominant countries (2016): Total DALYs per 100,000 population and uncertainty estimates due to all causes in 10 - 24 year olds, both sexes combined

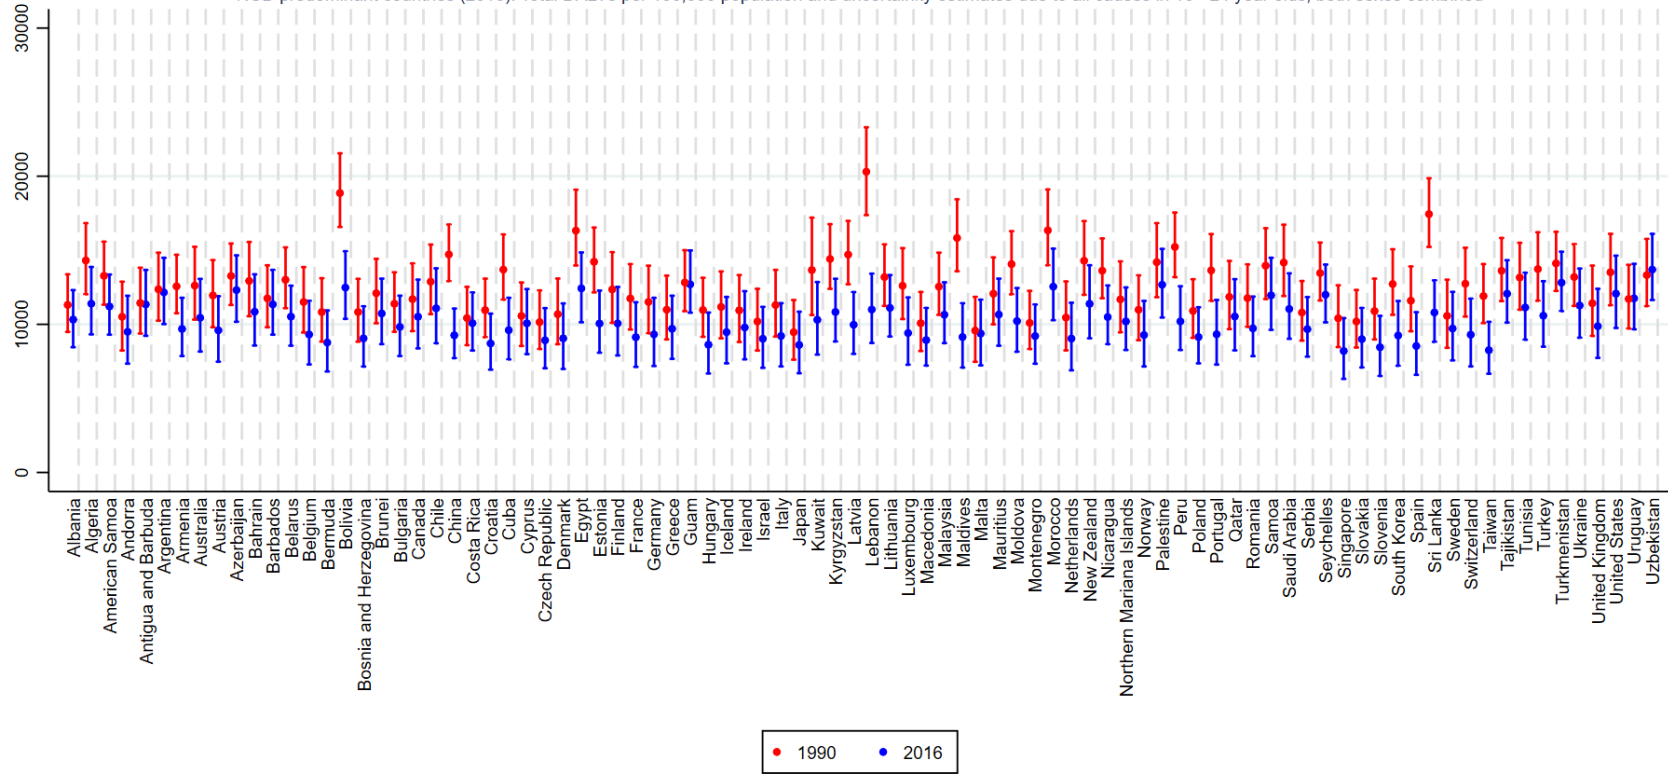

## Appendix 2.6 Years of life lost (YLL) for all causes in 10 - 24 year olds

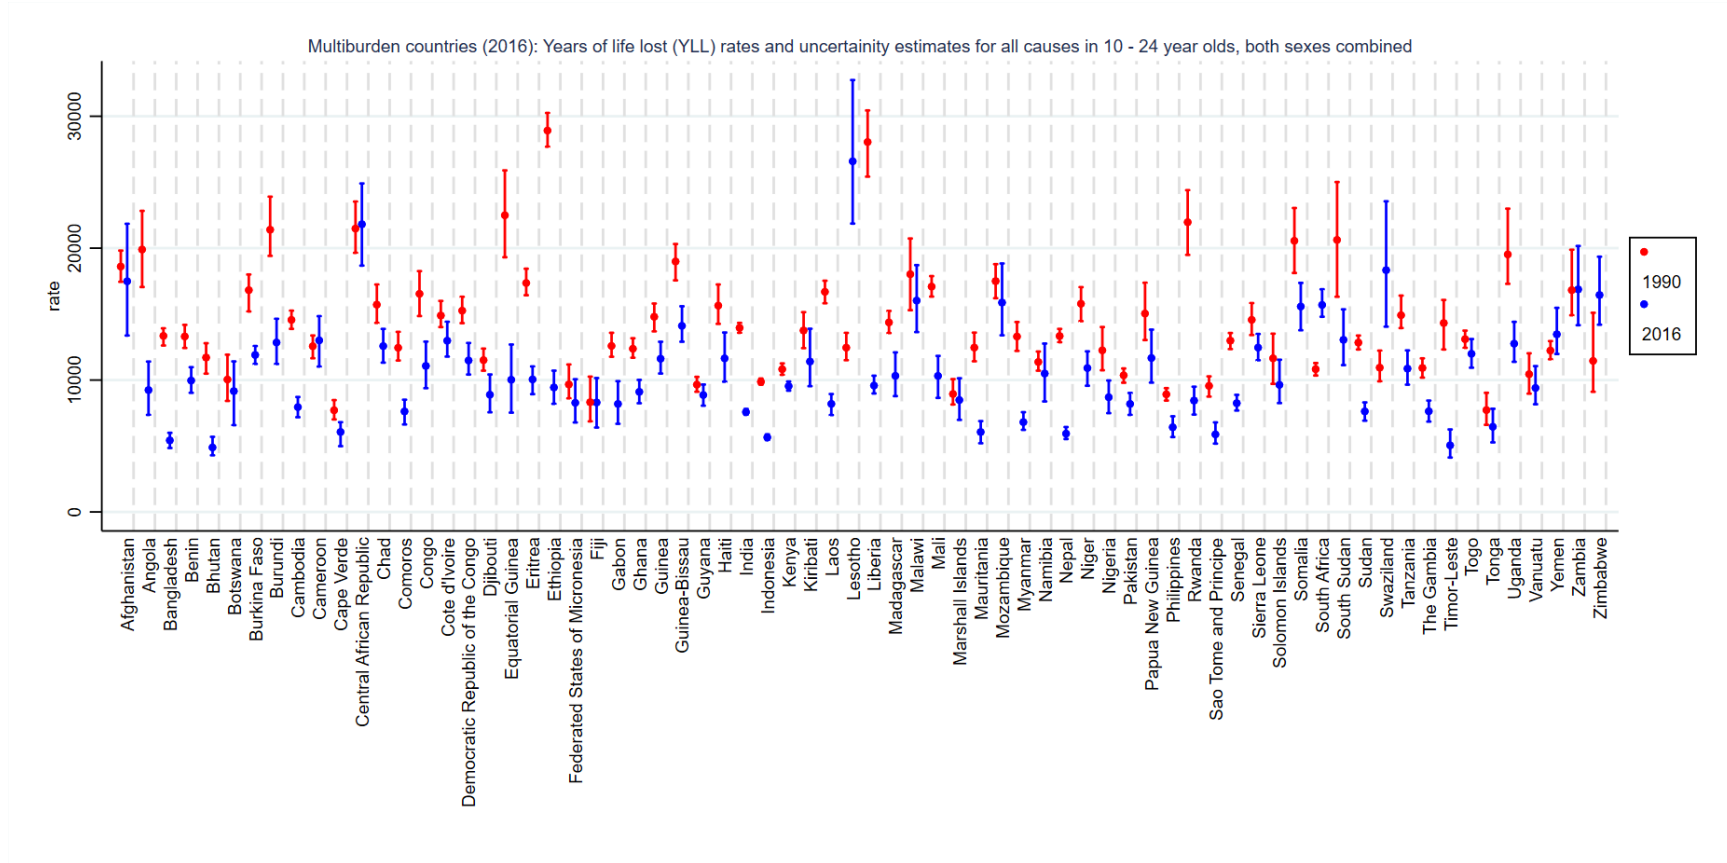

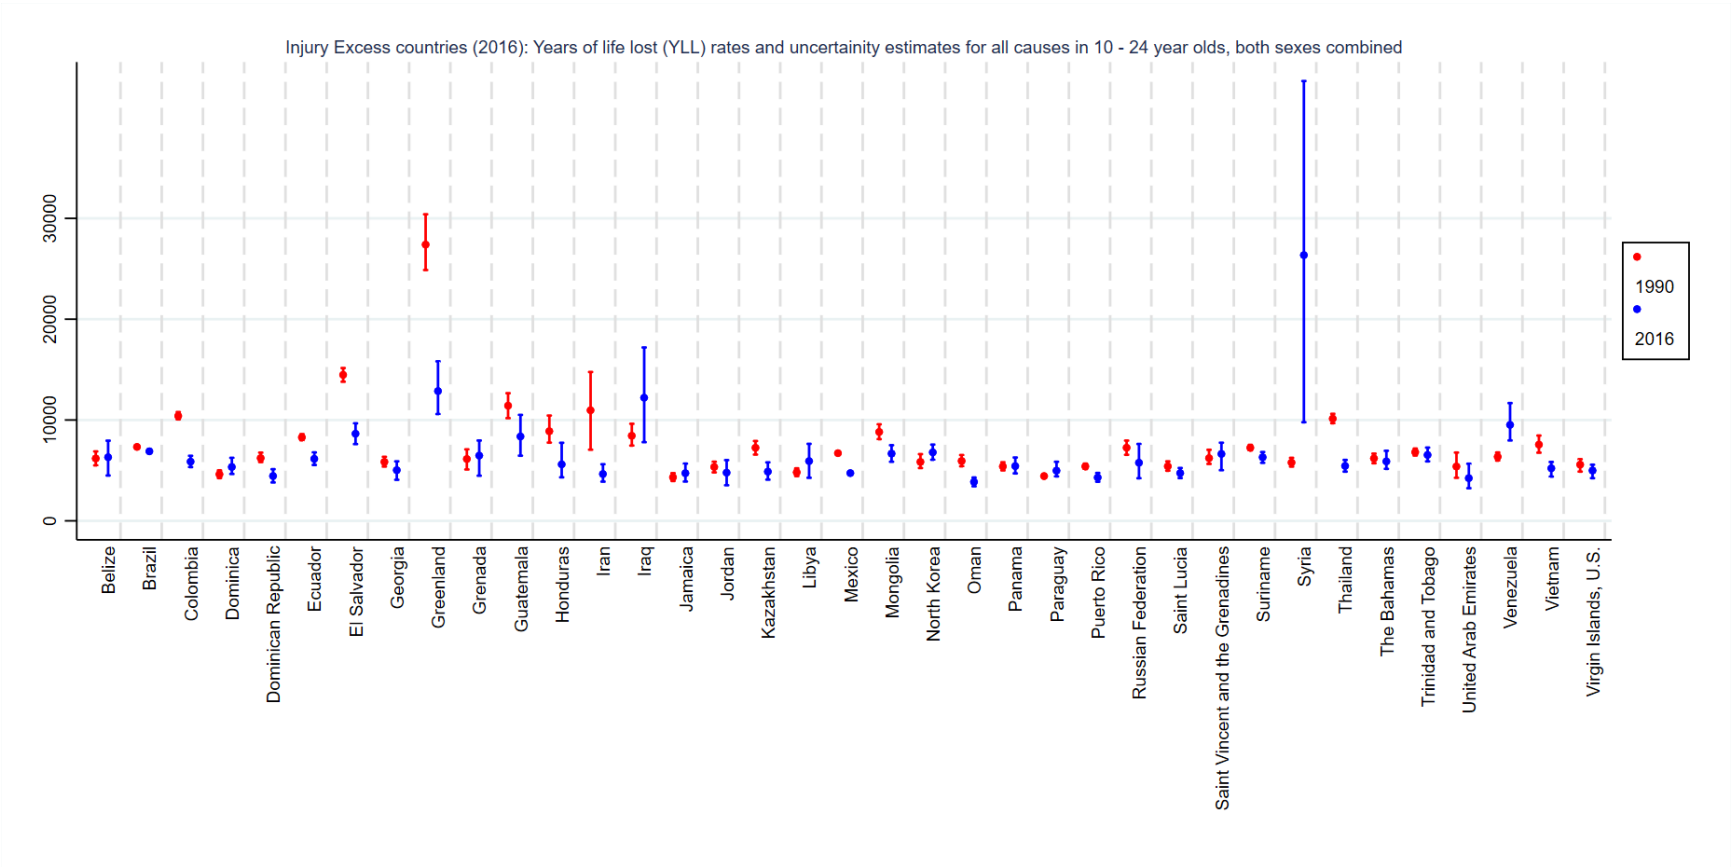

NCD predominant countries (2016): Years of life lost (YLL) rates and uncertainty estimates for all causes in 10 - 24 year olds, both sexes combined

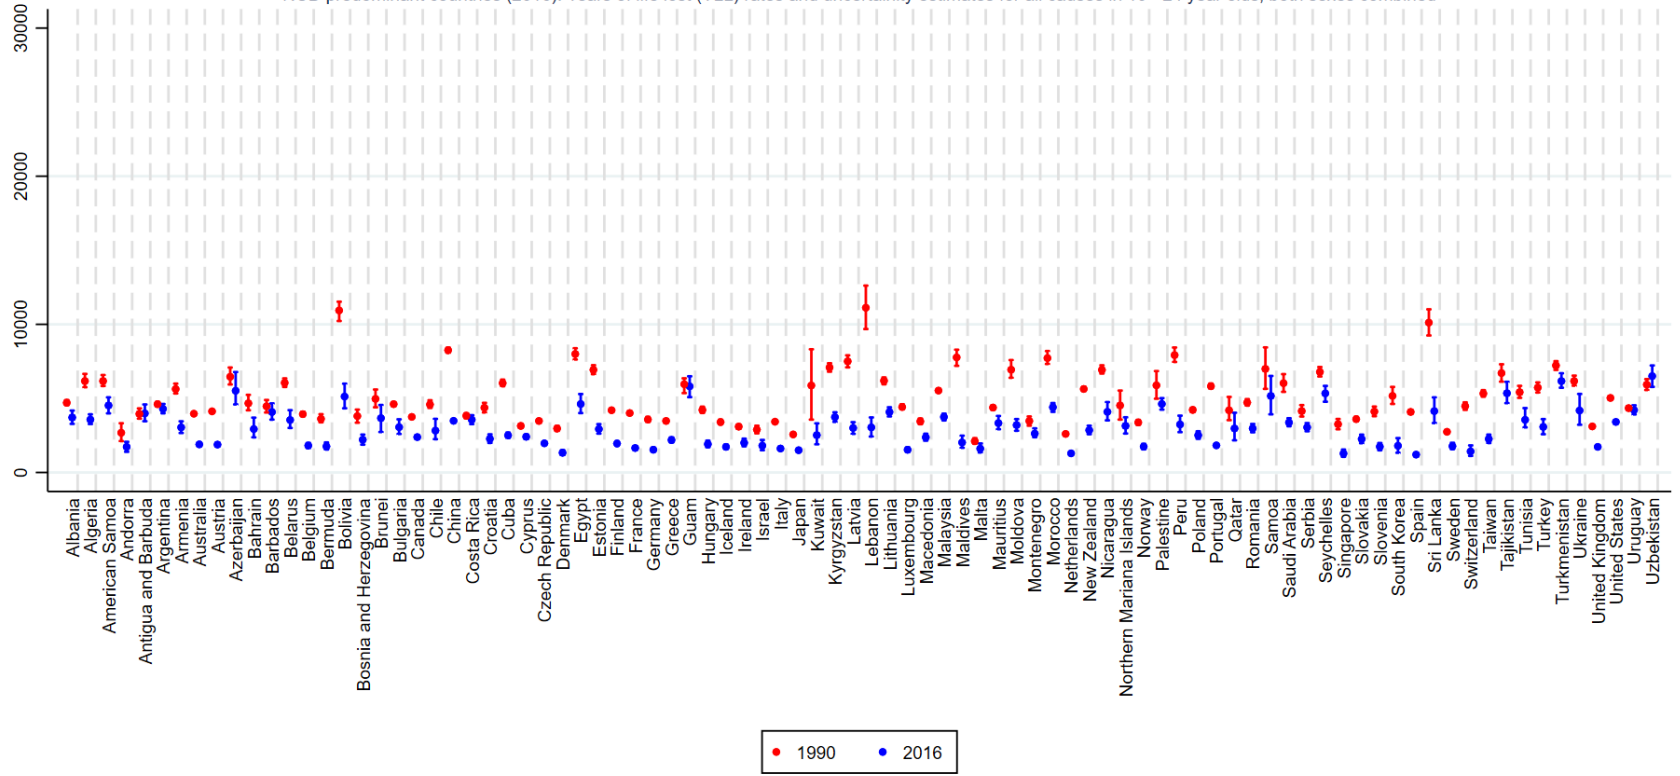

## Appendix 2.7 Years Lived with Disability (YLD) for all causes in 10 - 24 year olds

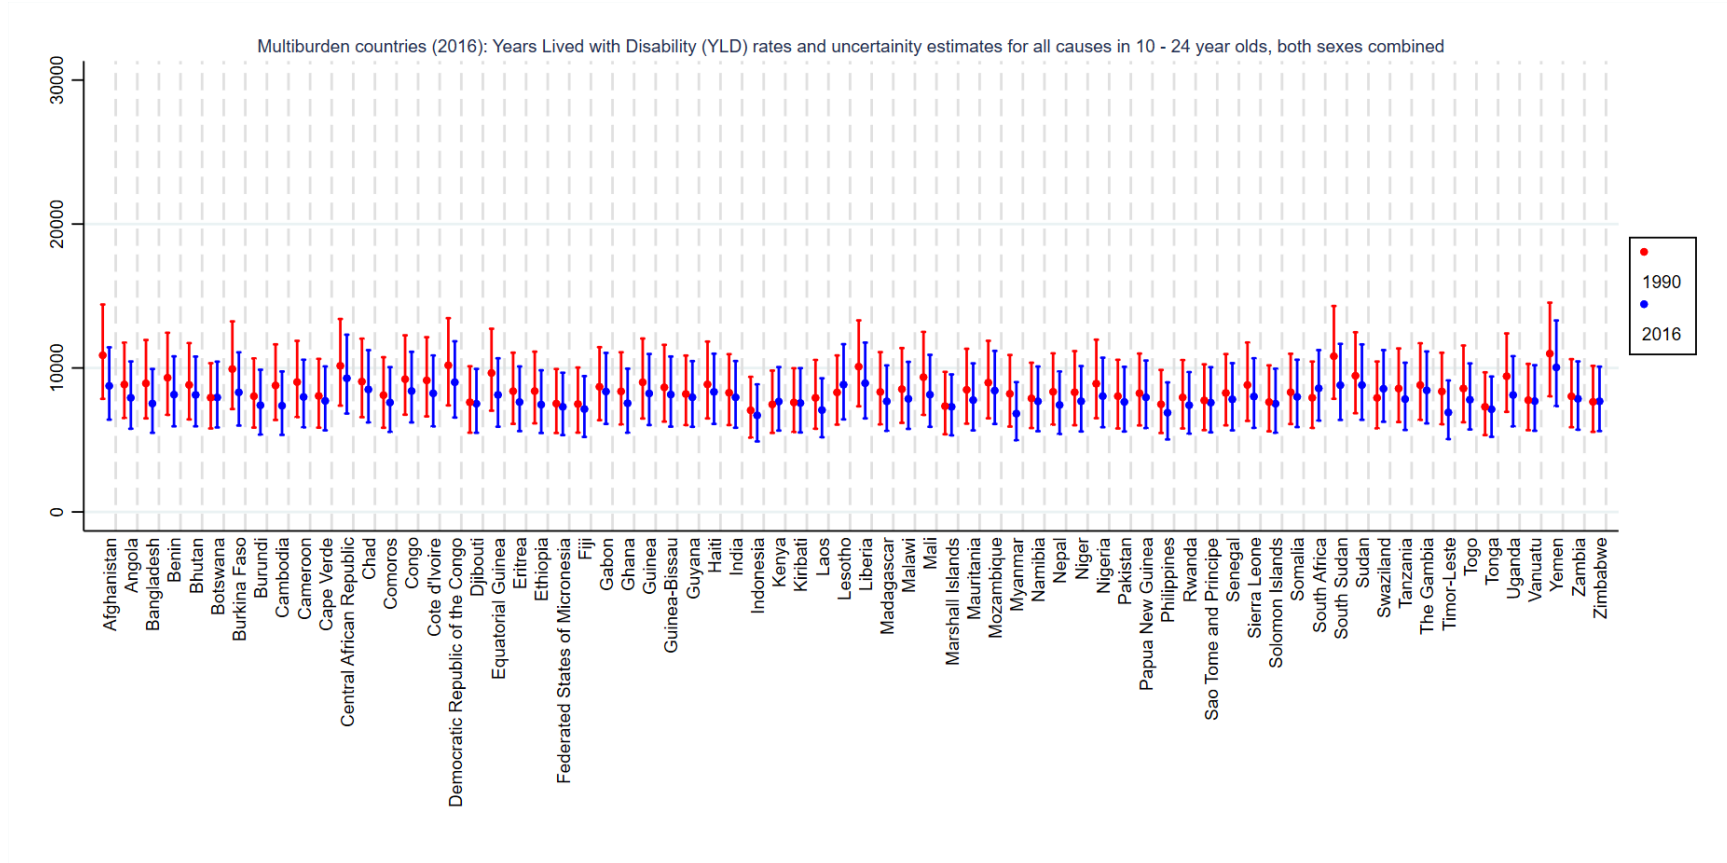

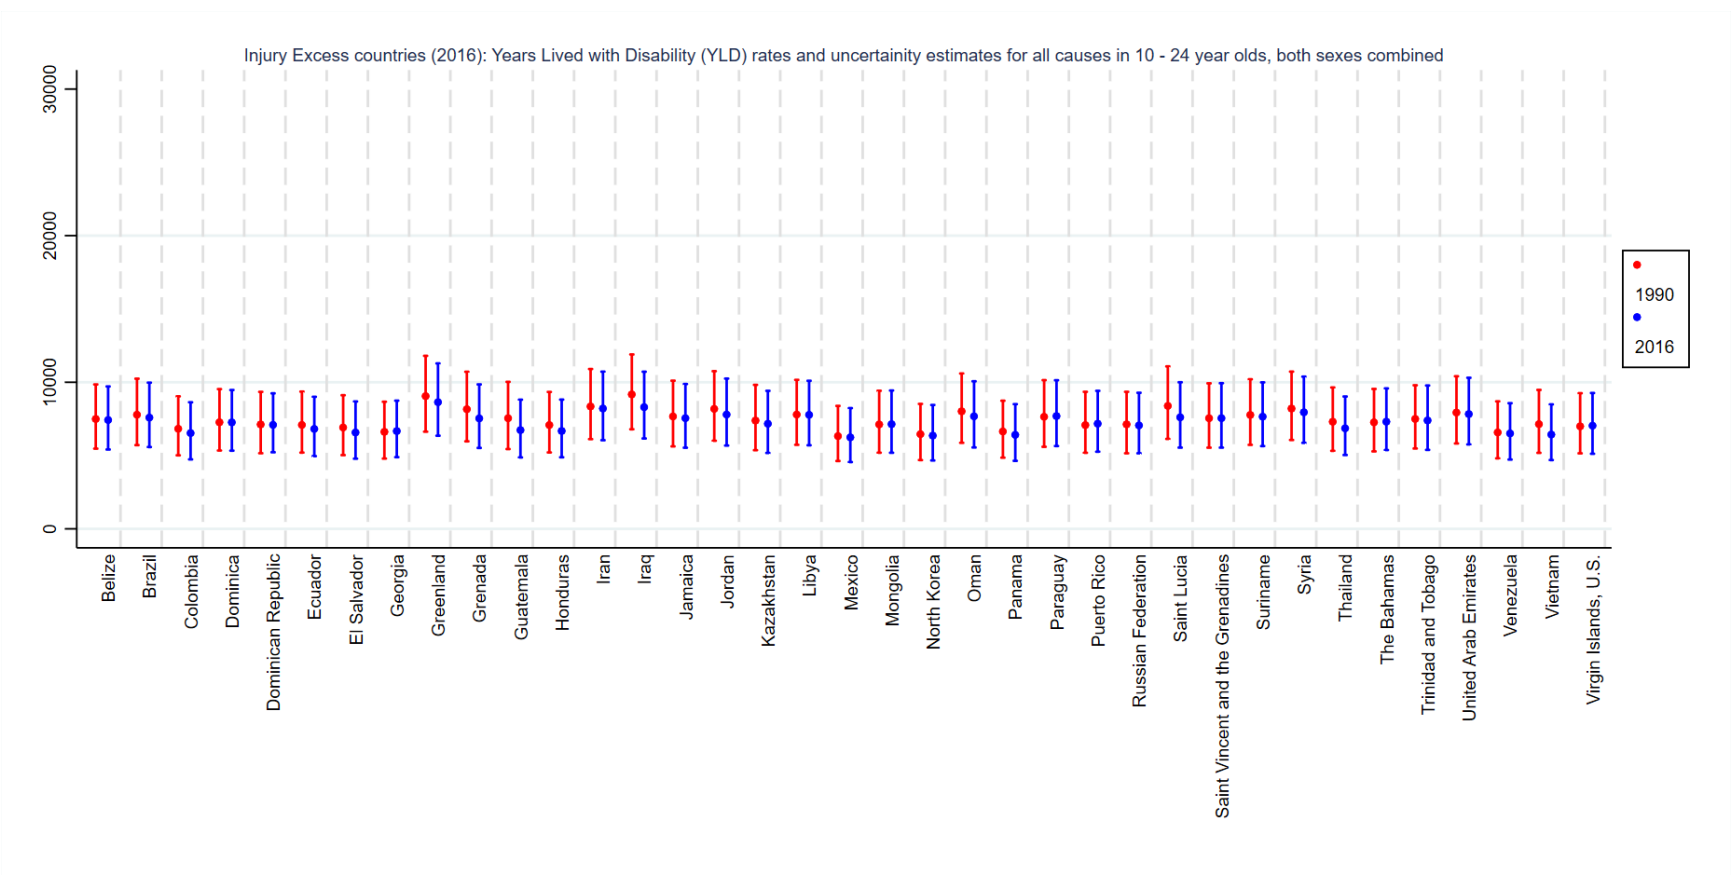



NCD predominant countries (2016): Years Lived with Disability (YLD) rates and uncertainty estimates for all causes in 10 - 24 year olds, both sexes combined

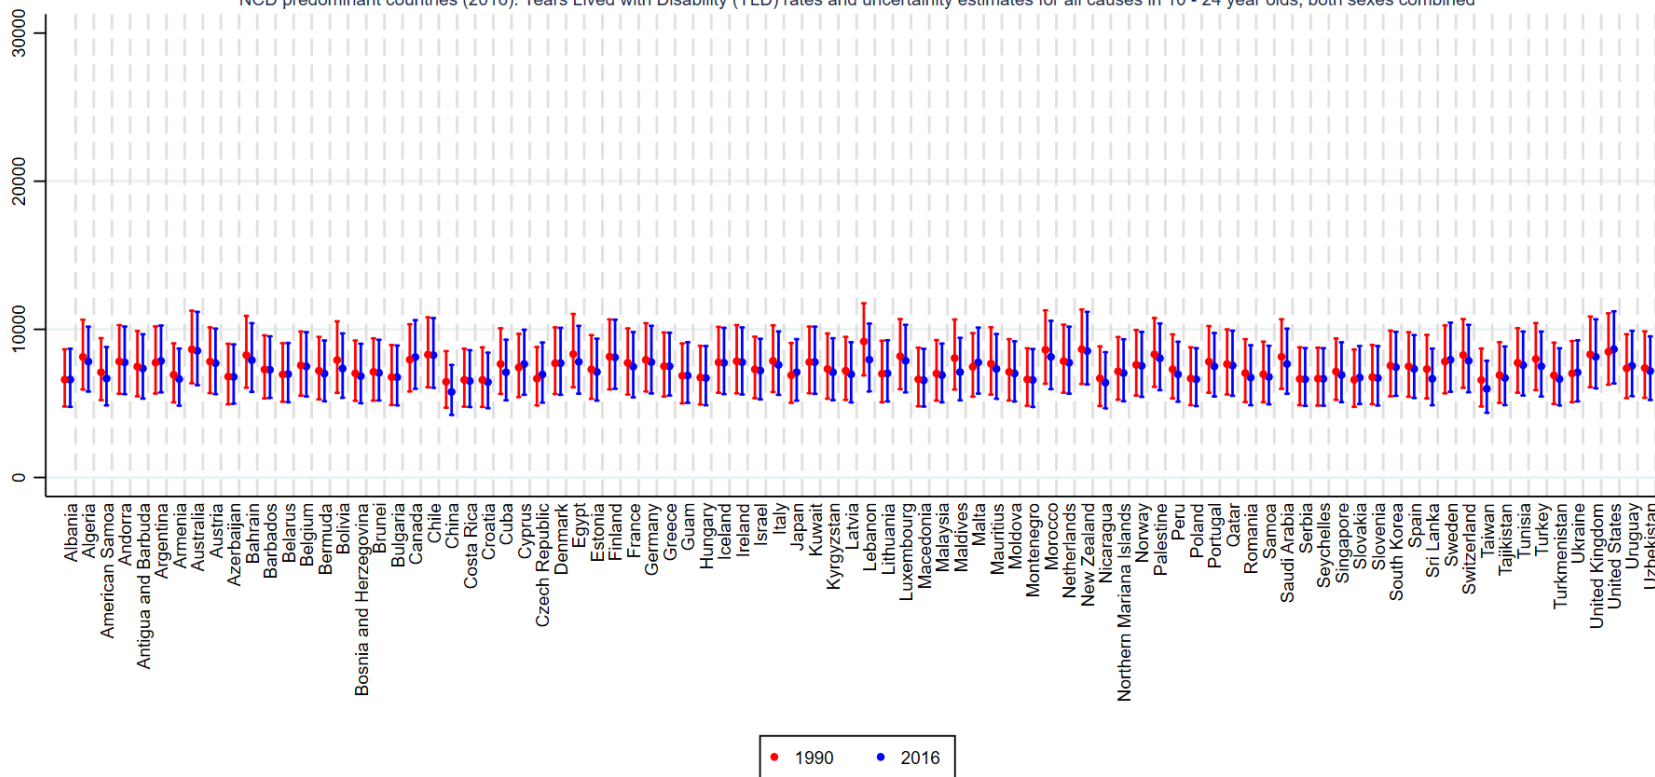

## Appendix 2.8 Prevalence of daily use of any smoked tobacco product in 10 - 24 year olds

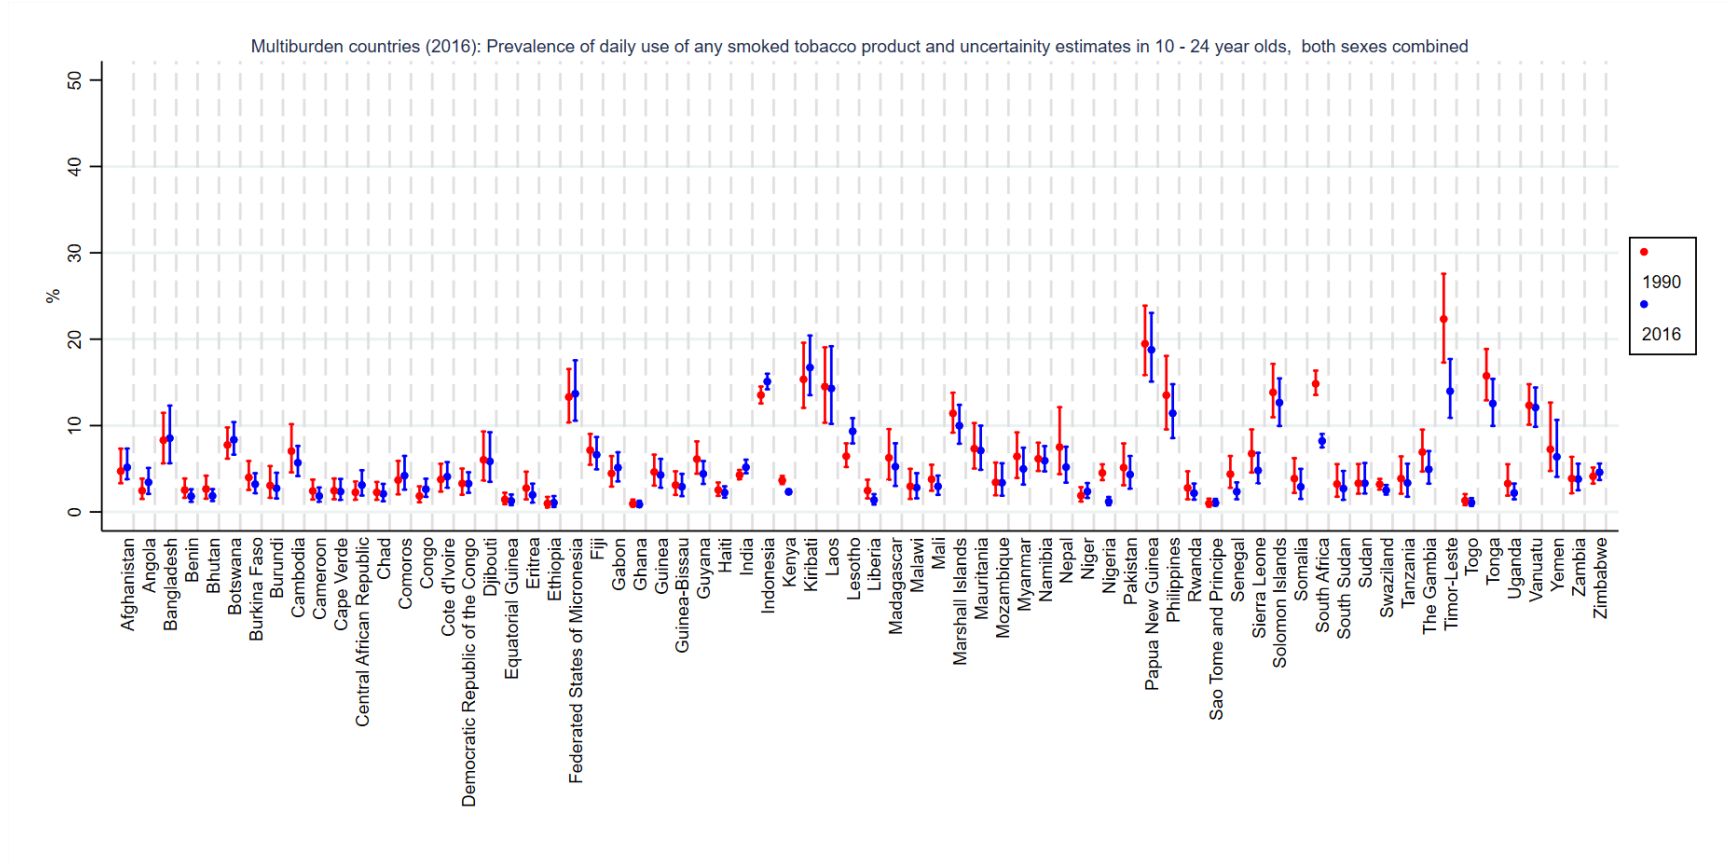

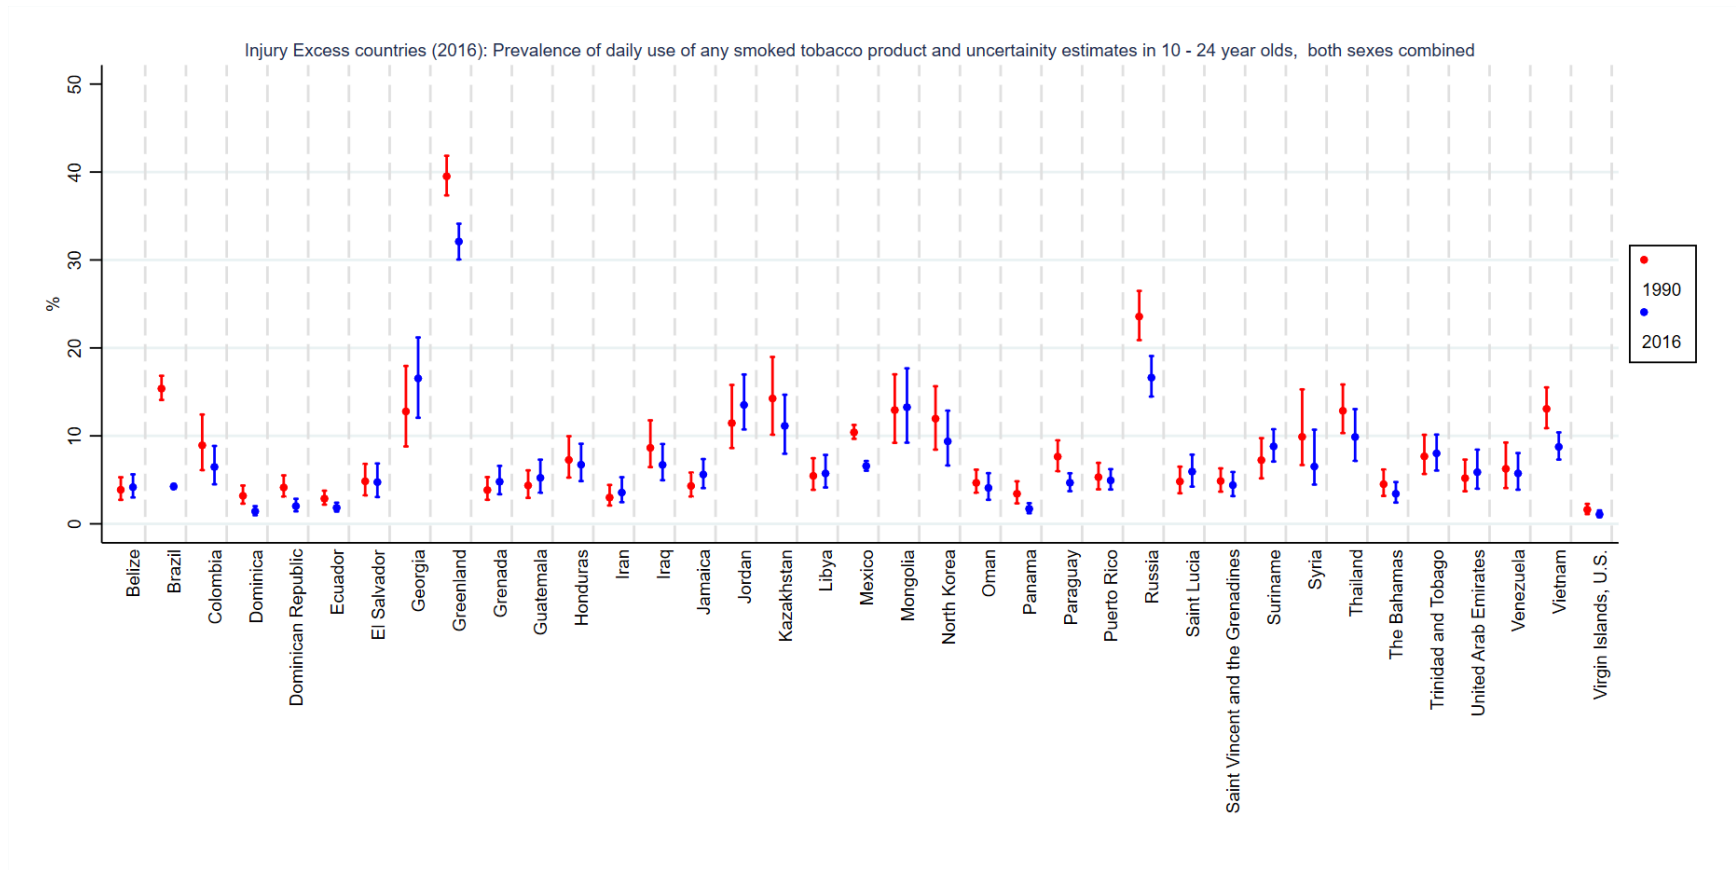

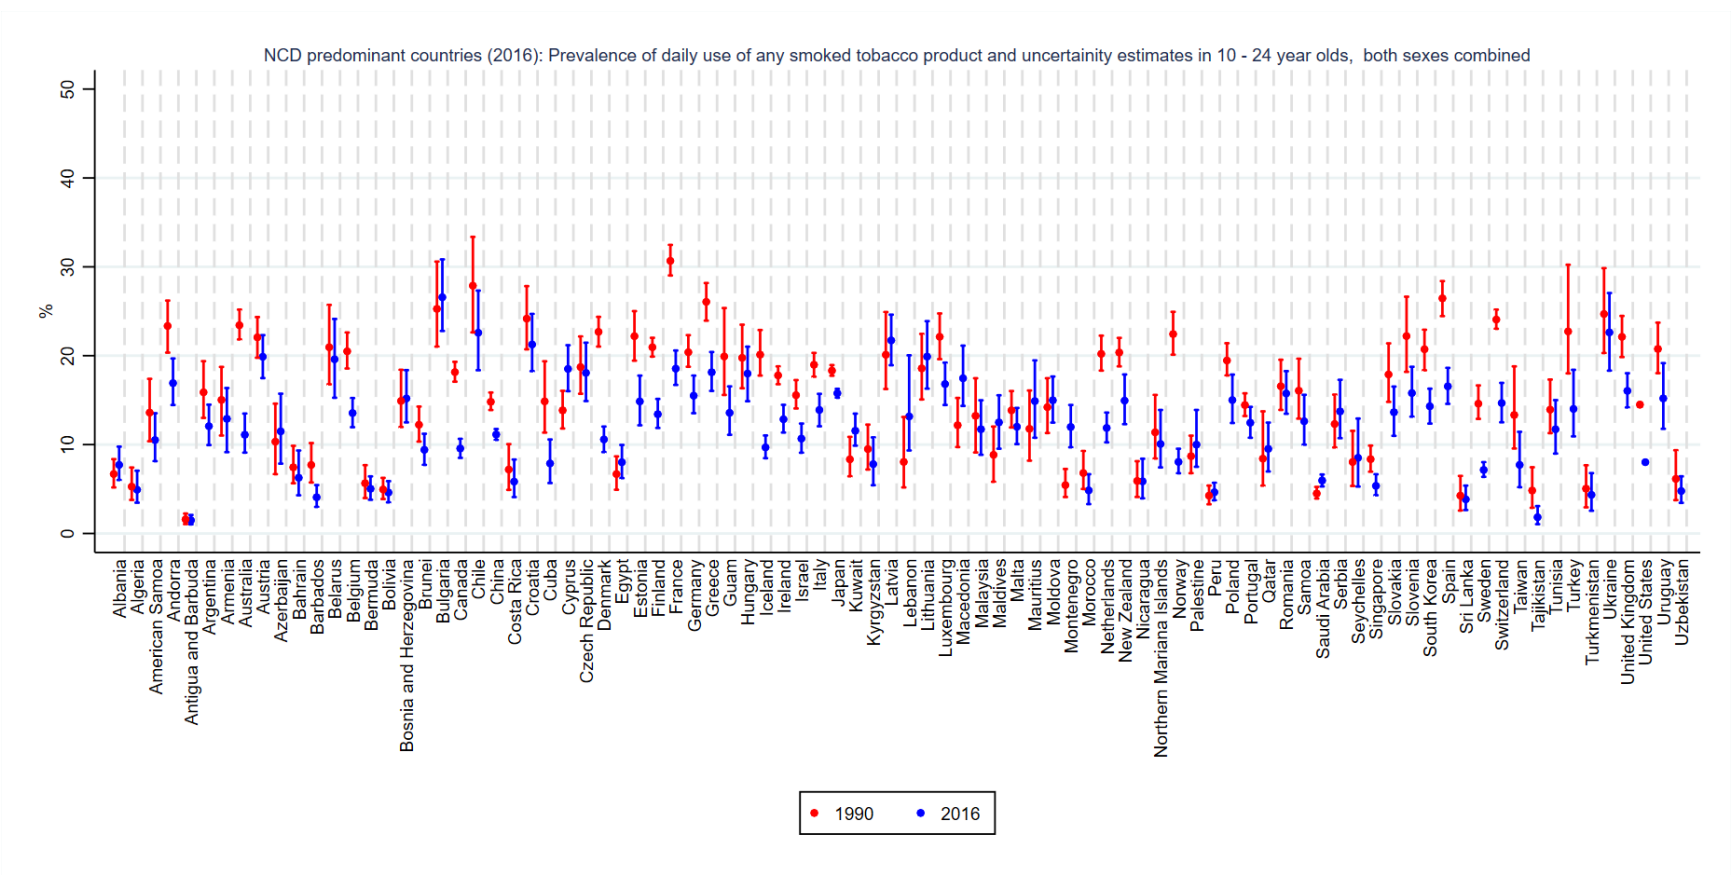

Appendix 2.9 Prevalence of episode of binge alcohol use (>48 grams of alcohol for females, >60g for males) in the past 12 months for 15 - 19 year olds

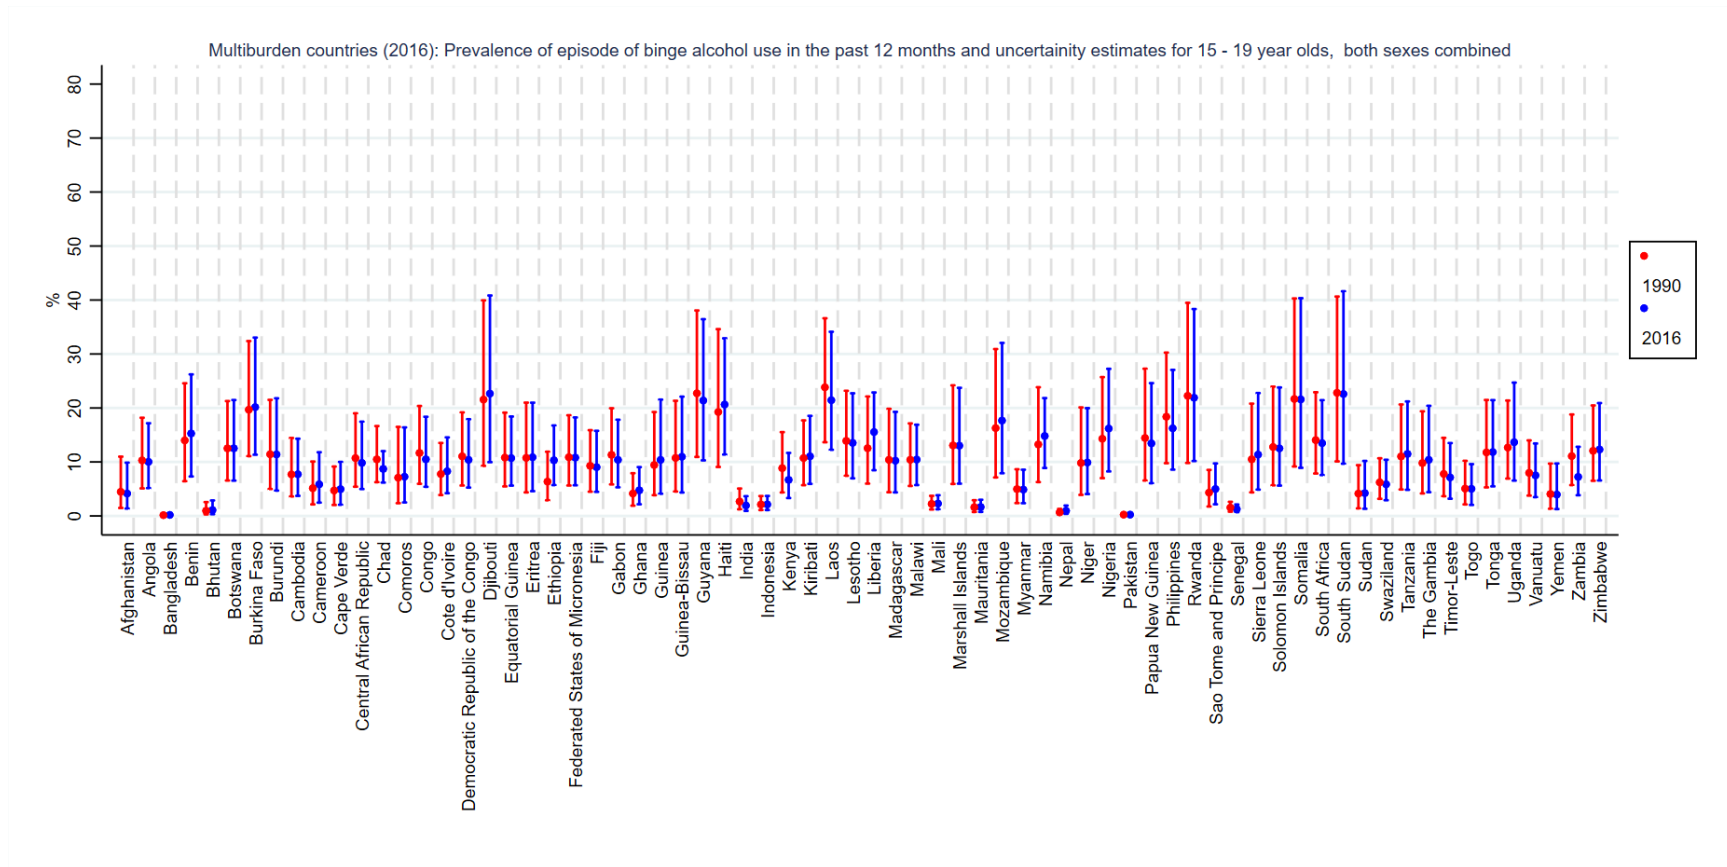

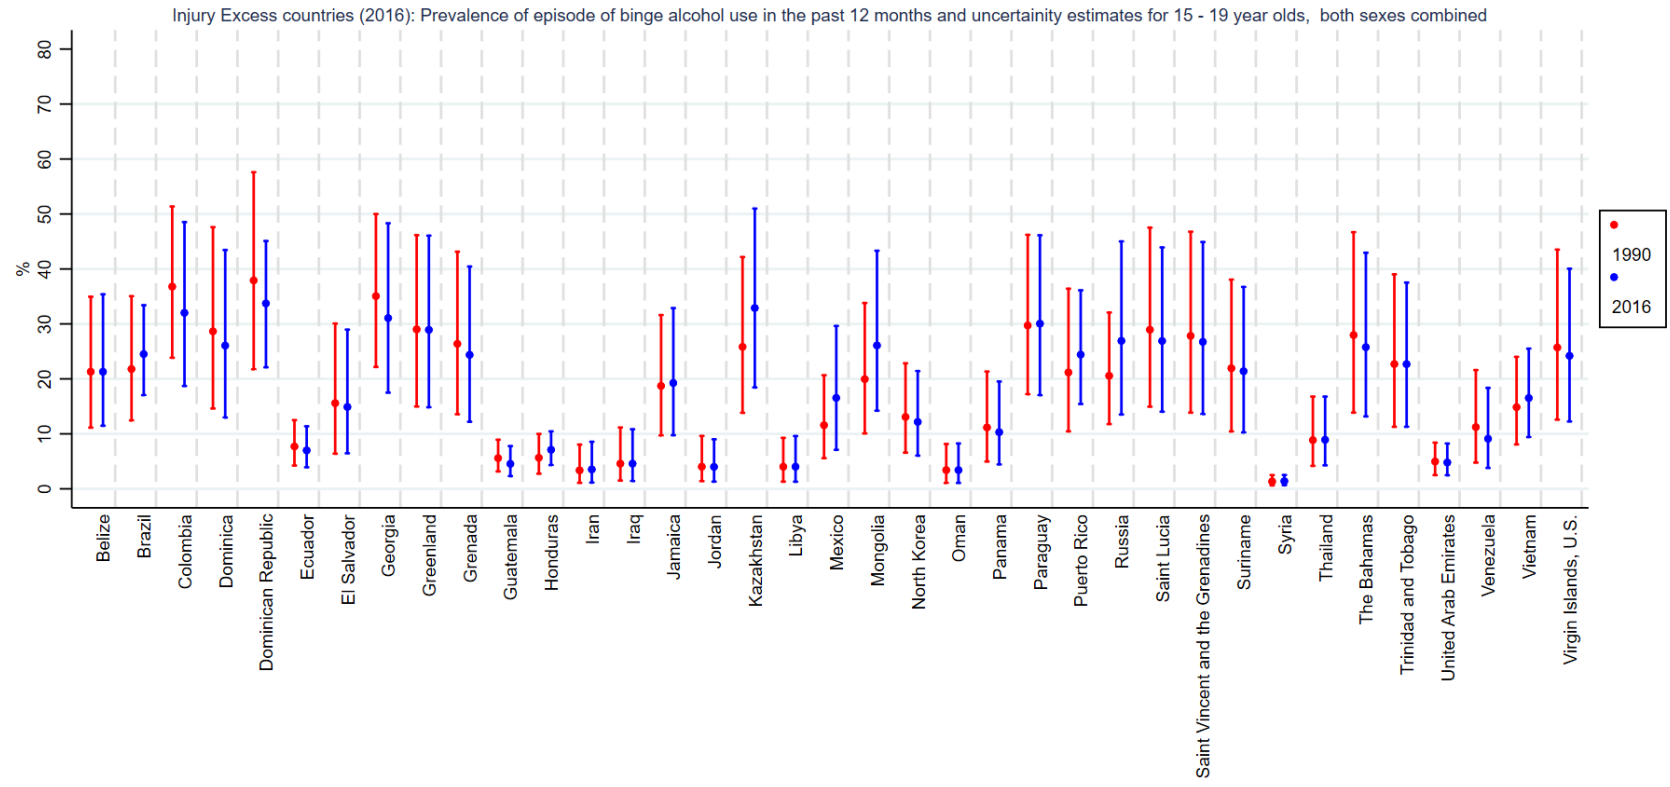

NCD predominant countries (2016): Prevalence of episode of binge alcohol use in the past 12 months and uncertainty estimates for 15 - 19 year olds, both sexes combined

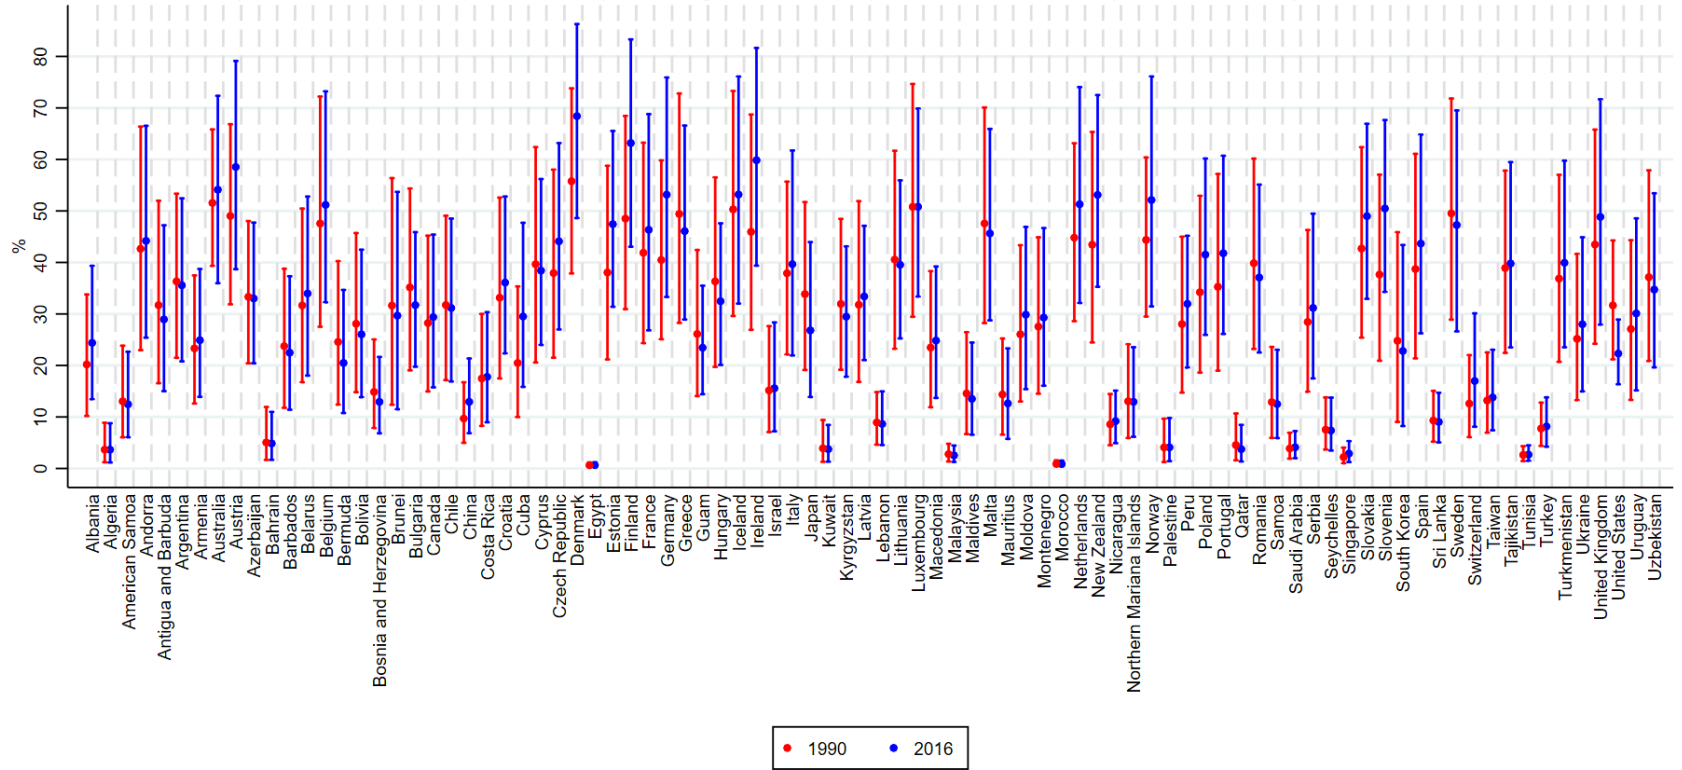

Appendix 2.10 Prevalence of overweight and obesity (IOTF thresholds, age and gender specific thresholds, equivalent to a BMI  $\geq 25\text{kg/m}^2$  at age 18 years) in 10 - 24 year olds

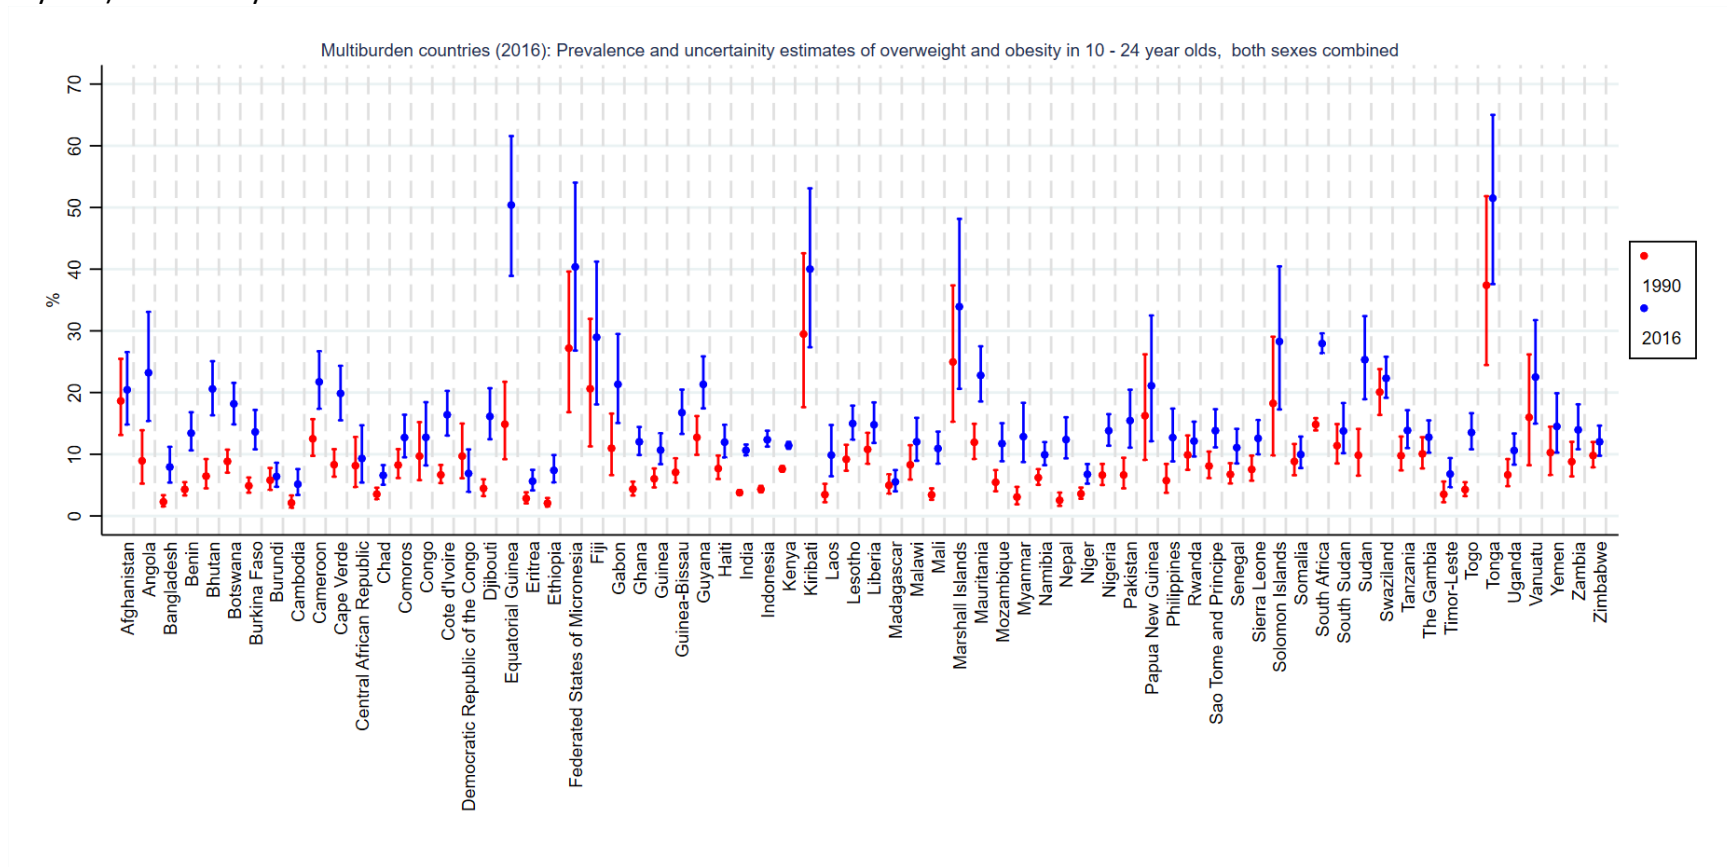



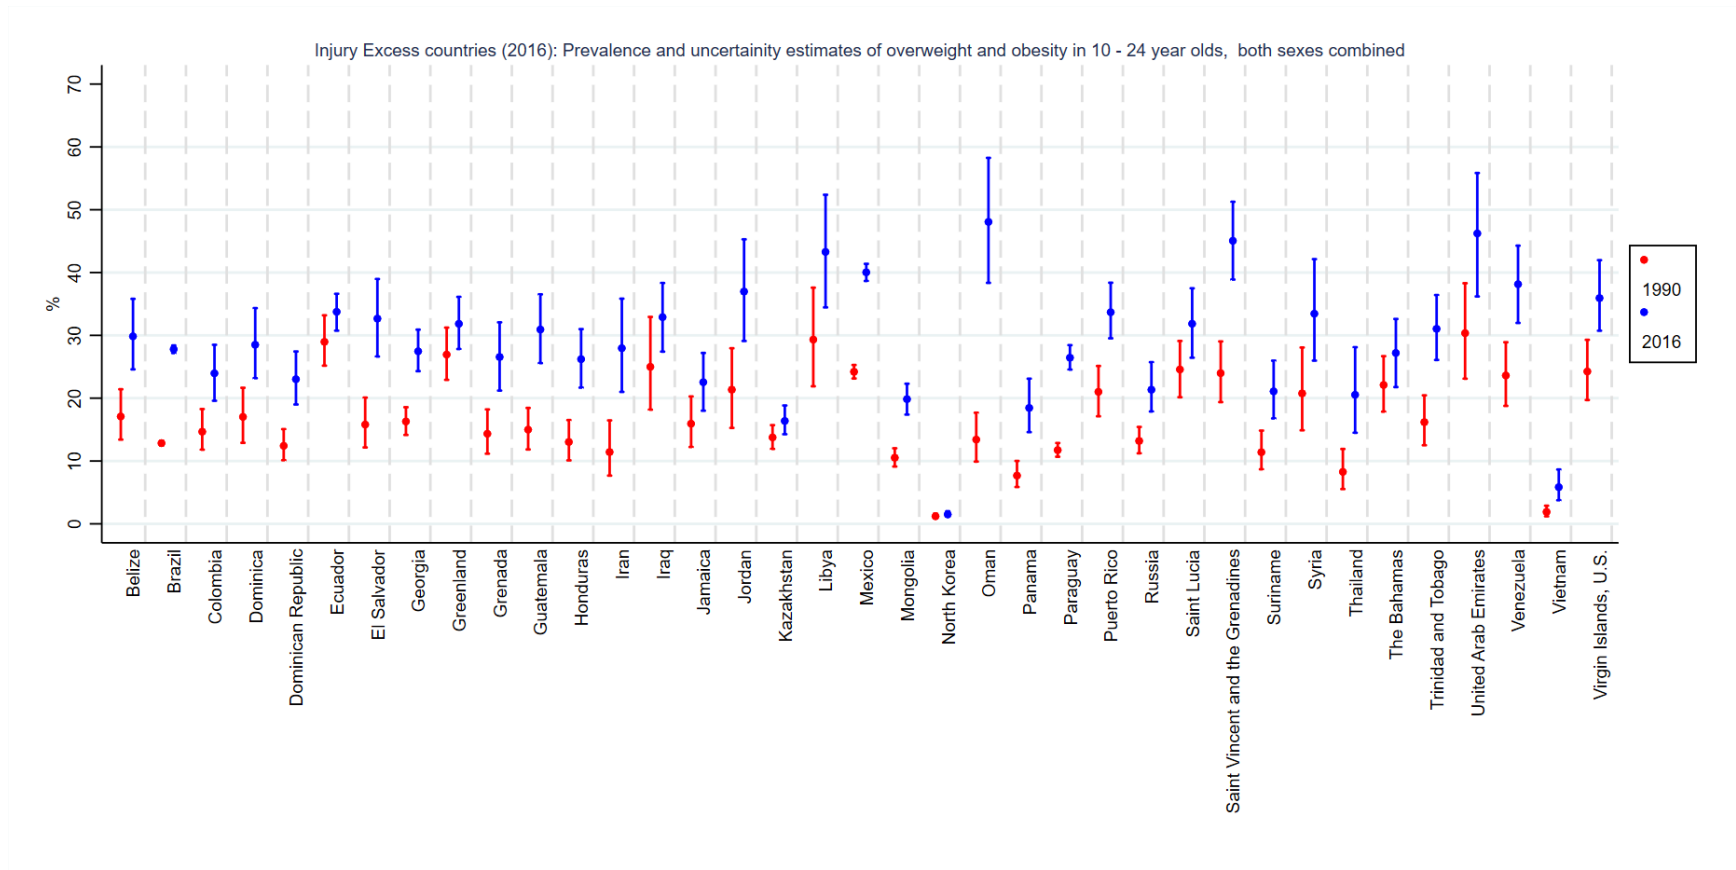

NCD predominant countries (2016): Prevalence and uncertainty estimates of overweight and obesity in 10 - 24 year olds, both sexes combined

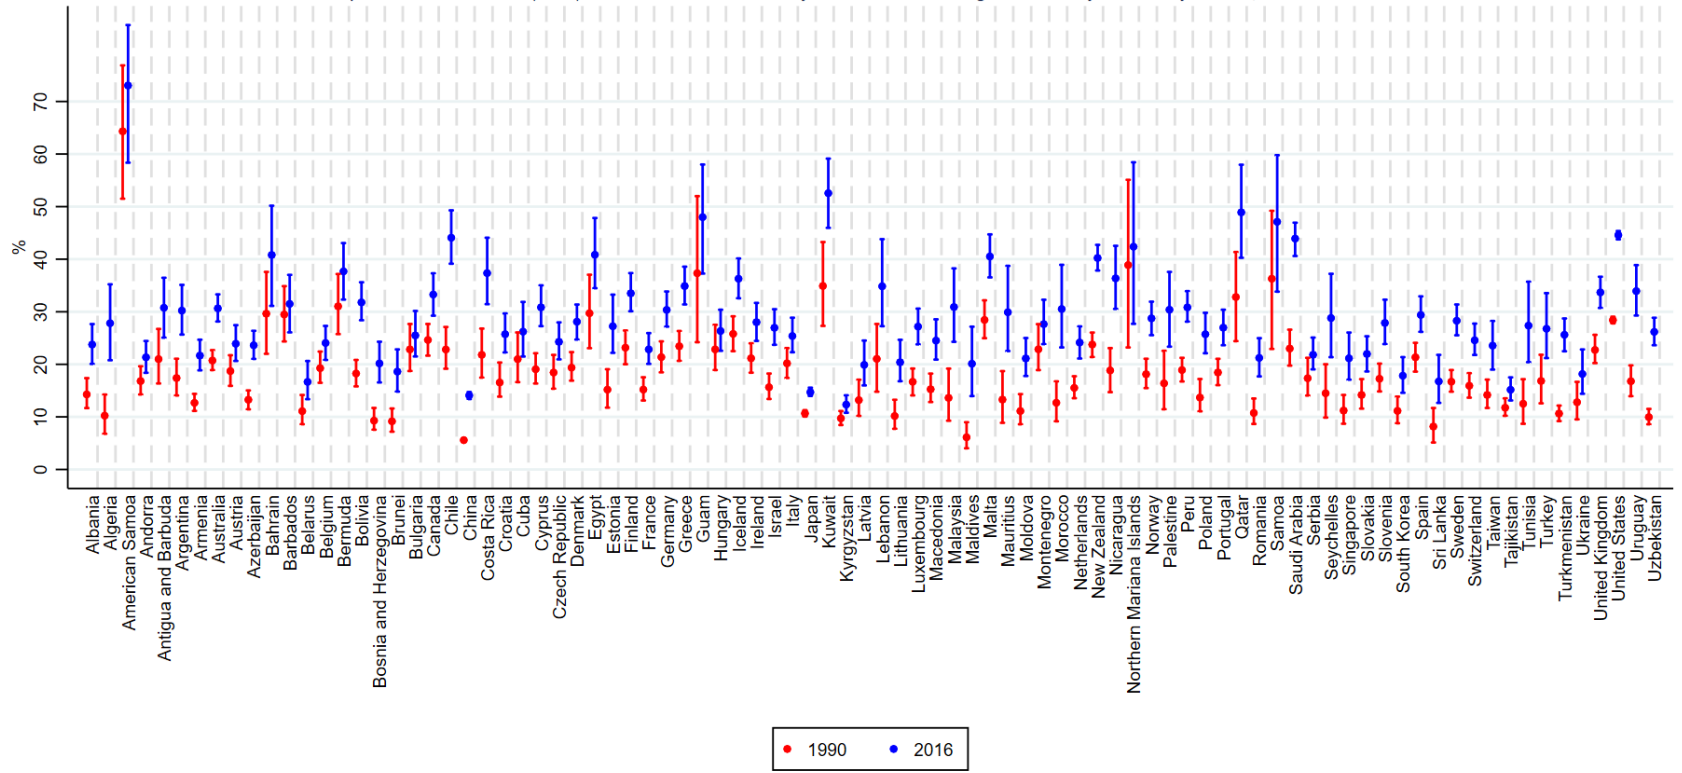

Appendix 2.11 Prevalence of anaemia (haemoglobin in g/L: 10 - 14 y <115; 15 - 24 y <130 males, <120 non-pregnant female, <110 pregnant) in 10 - 24 year olds

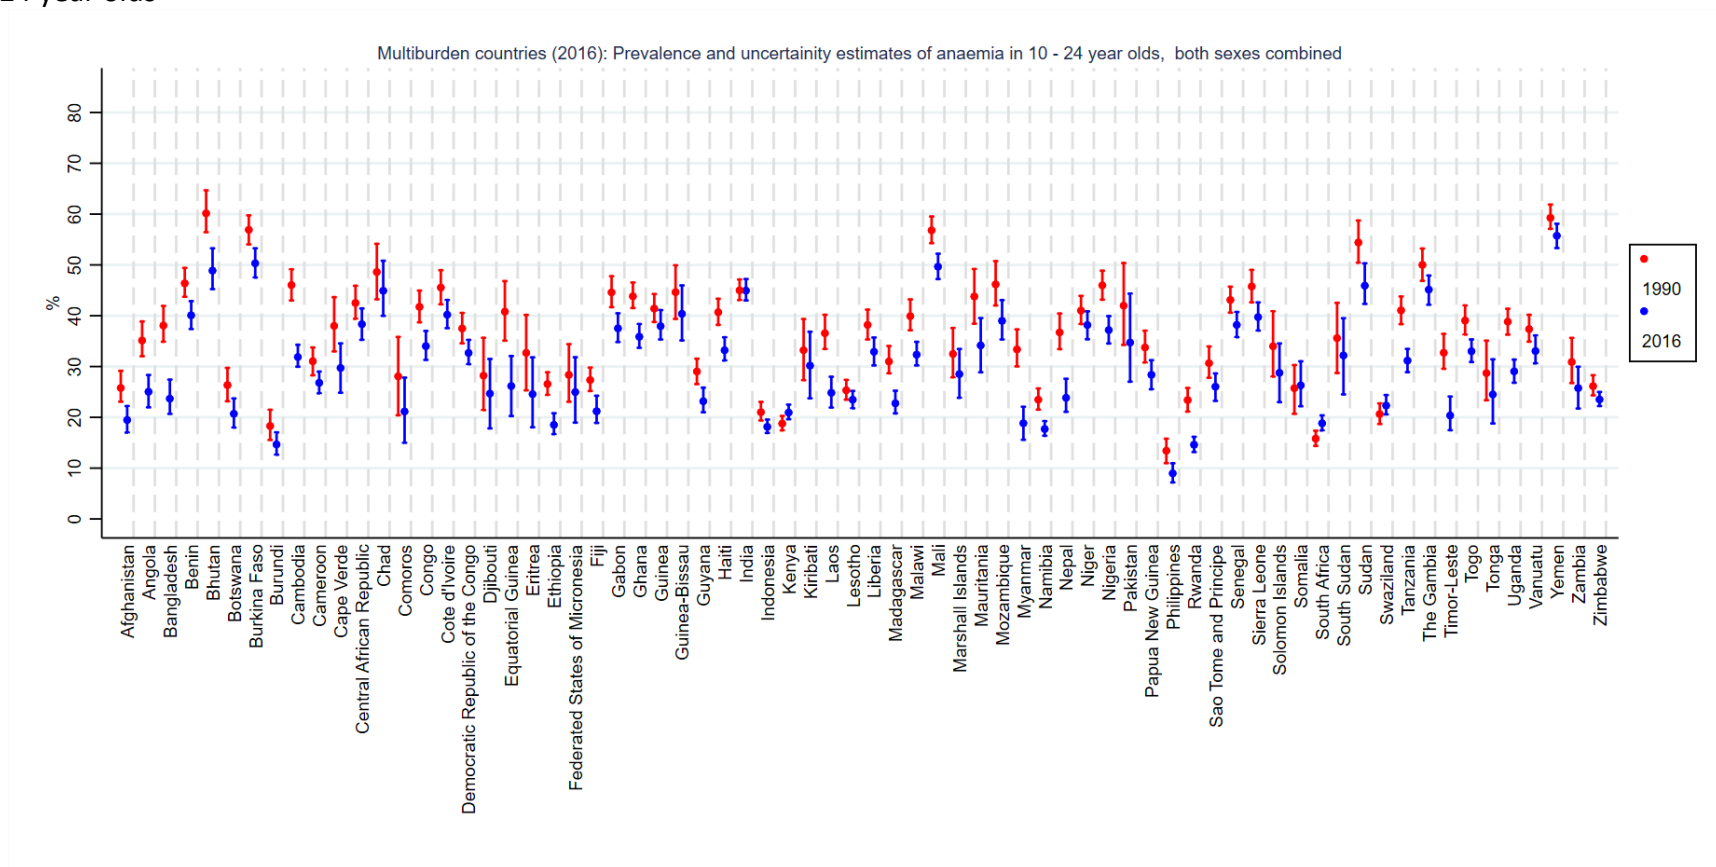

Injury Excess countries (2016): Prevalence and uncertainty estimates of anaemia in 10 - 24 year olds, both sexes combined

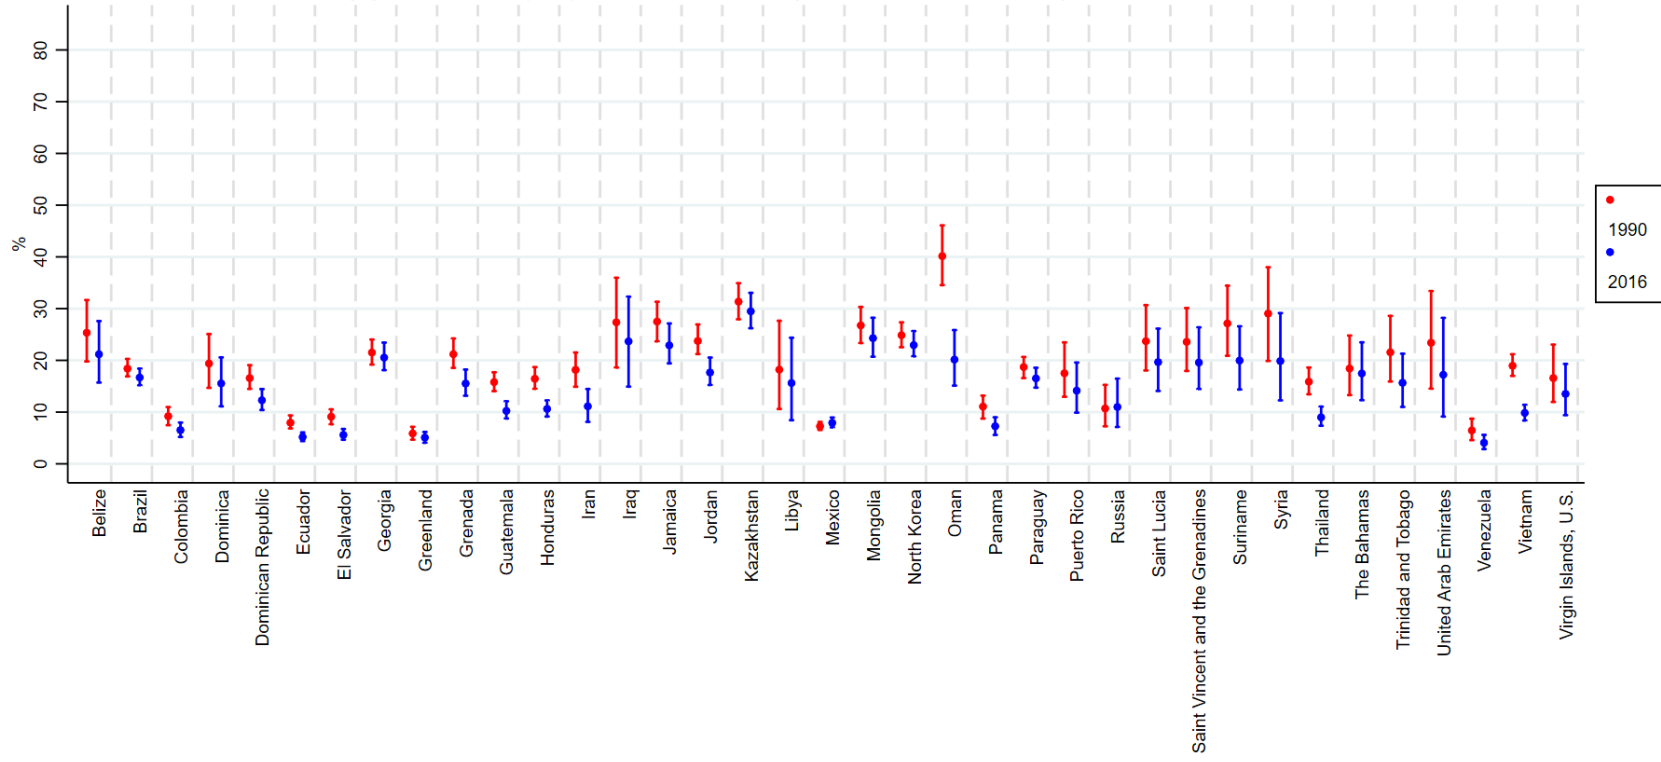

NCD predominant countries (2016): Prevalence and uncertainty estimates of anaemia in 10 - 24 year olds, both sexes combined

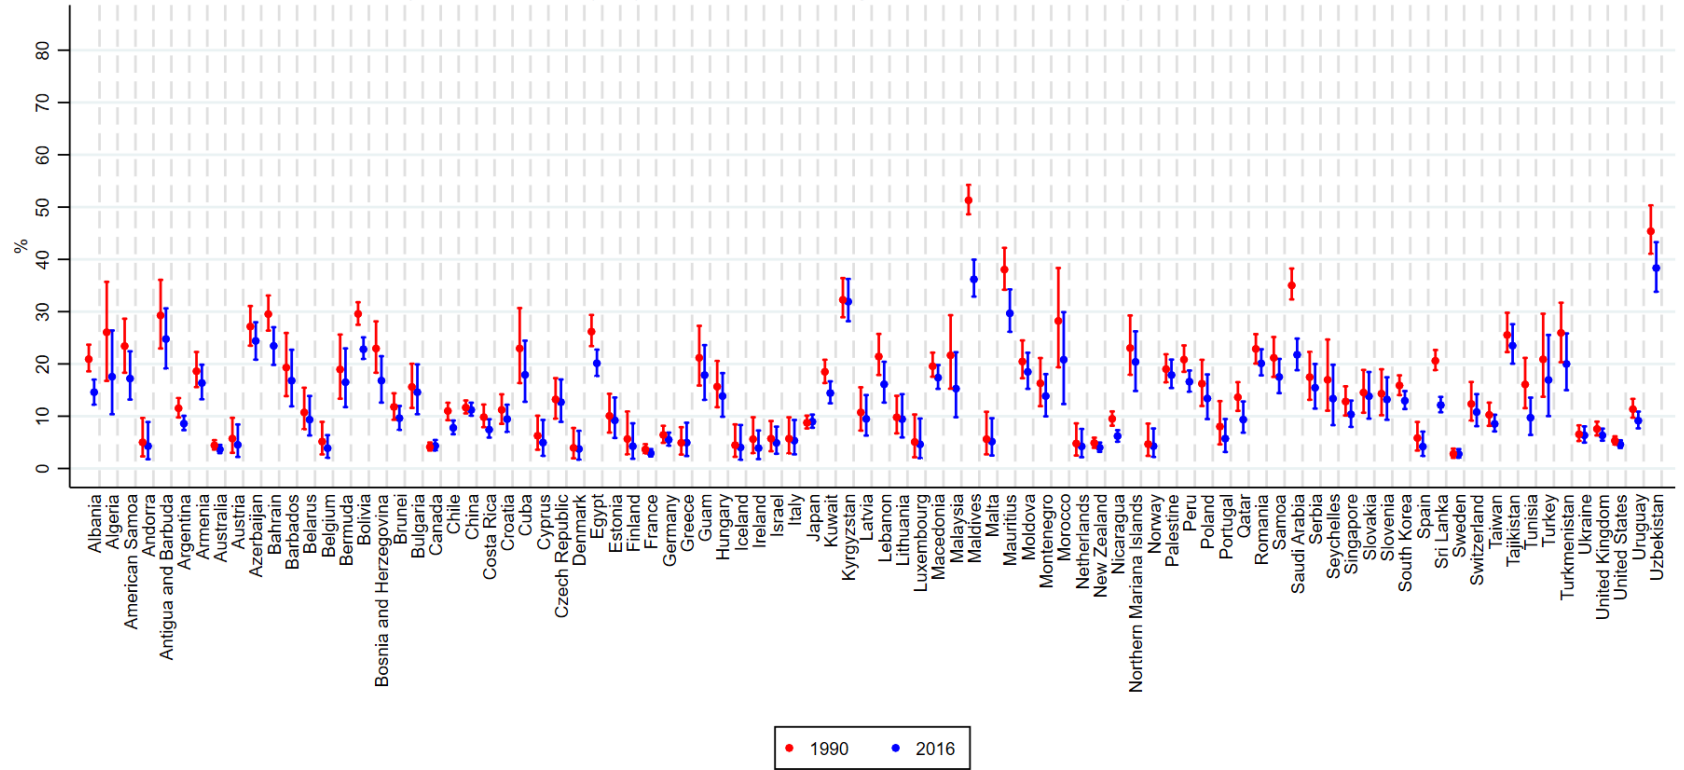

## Appendix 2.12 Proportion of 15 - 24 year old females whose demand for contraceptive is satisfied with a modern method

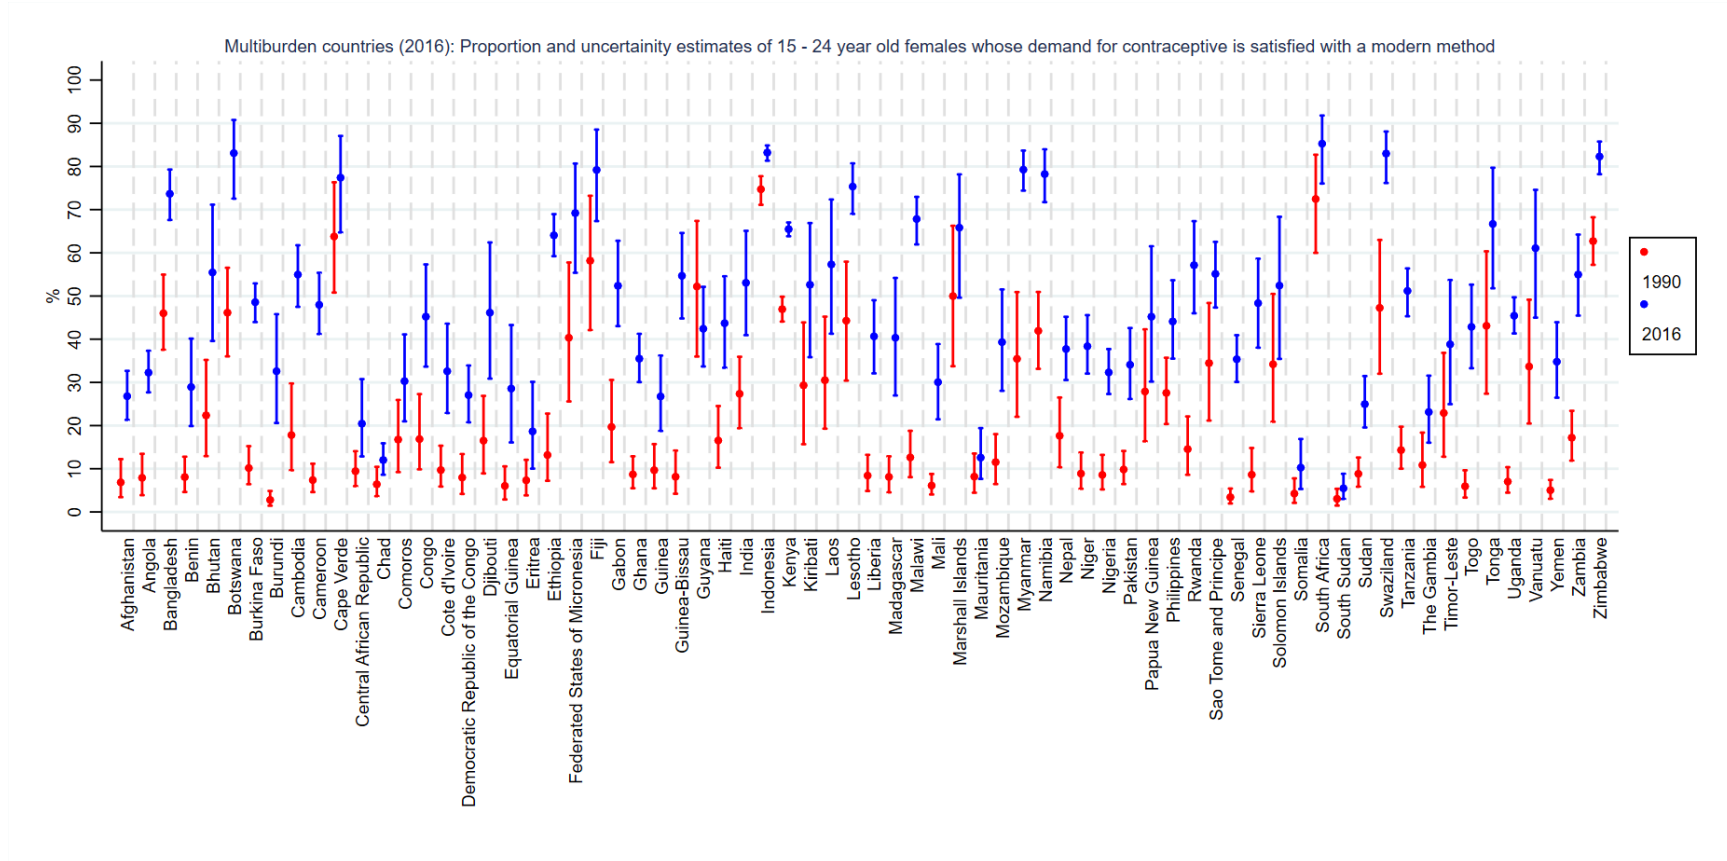

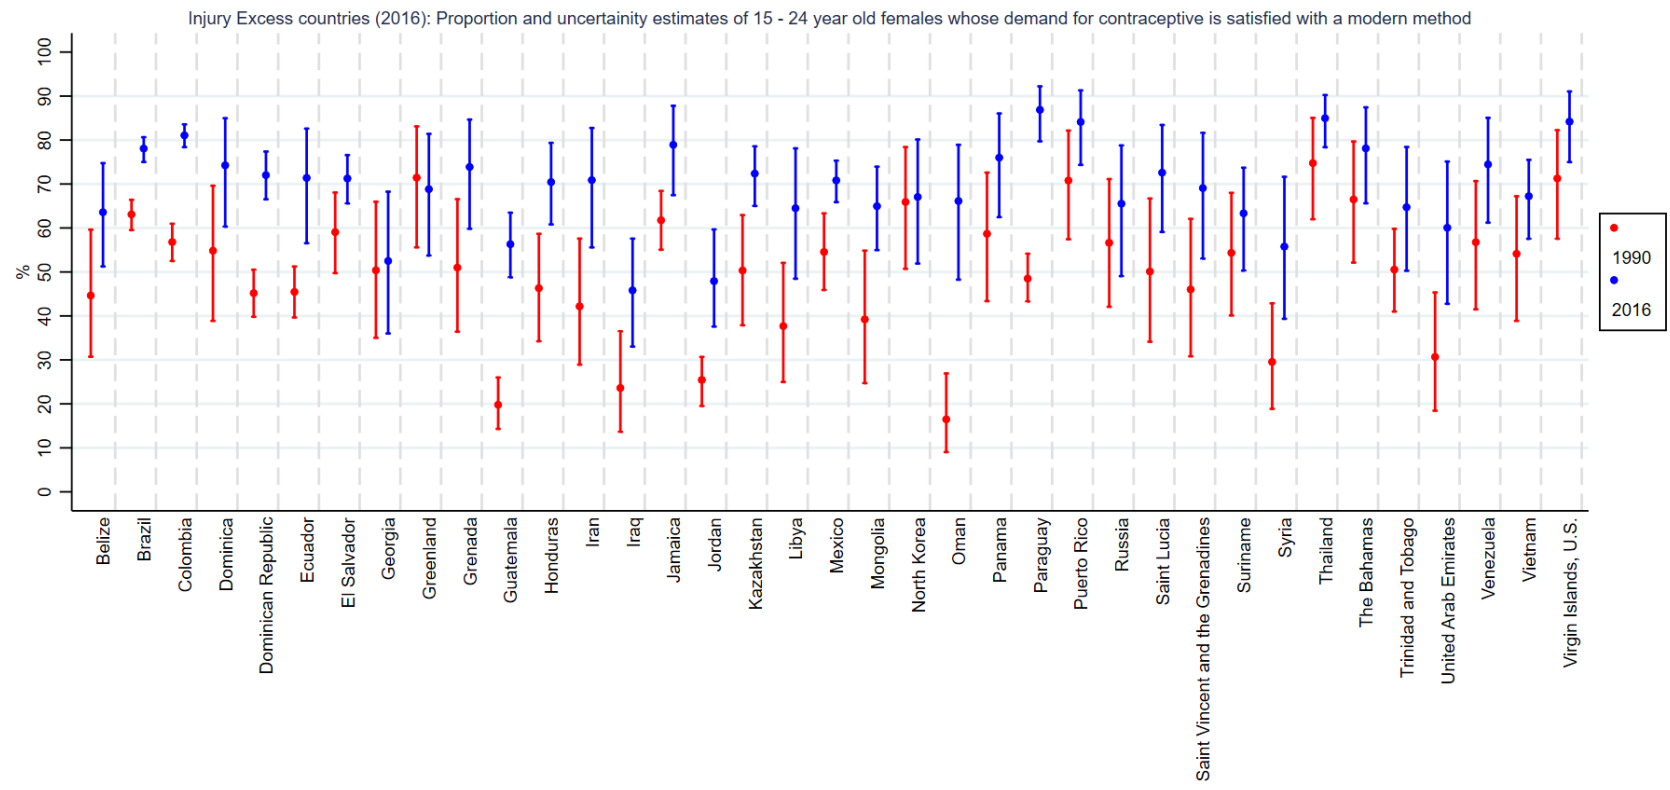

NCD predominant countries (2016): Proportion and uncertainty estimates of 15 - 24 year old females whose demand for contraceptive is satisfied with a modern method

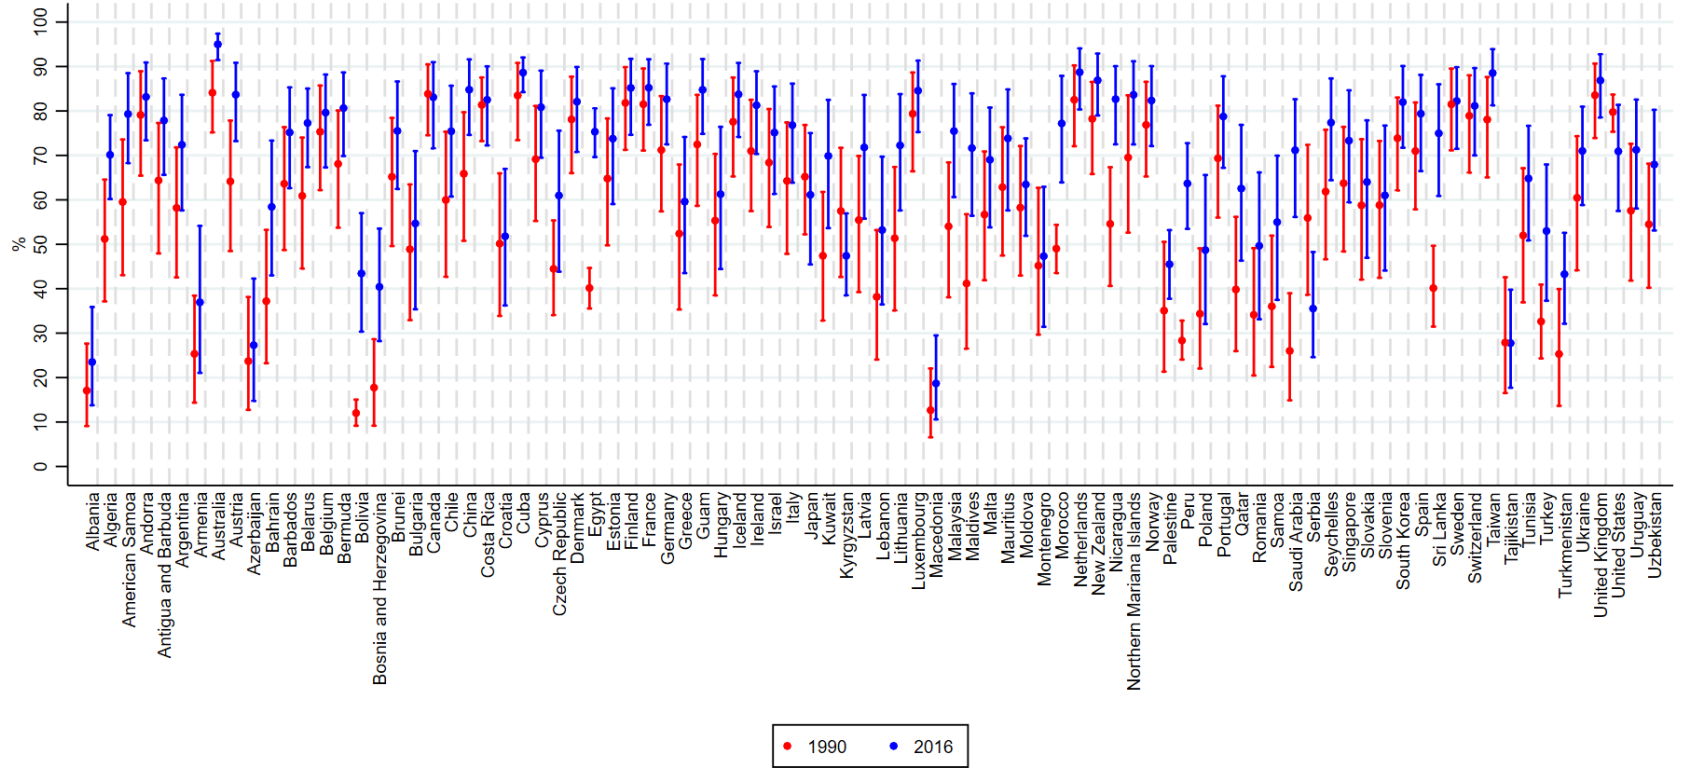



## Appendix 4 – Population counts for each country and population scenarios

Table 4a. This table reports the population, SDI score and country grouping for each of the 195 countries in 1990 and 2016, as well as the World Bank (WB) Income group in 2016

| Country                  | 1990        |      |                  | 2016        |      |                  |                      | Population change (%) |
|--------------------------|-------------|------|------------------|-------------|------|------------------|----------------------|-----------------------|
|                          | Population  | SDI  | Disease category | Population  | SDI  | Disease category | 2016 WB income group |                       |
| Afghanistan              | 3,861,415   | 0.16 | Multiburden      | 11,735,080  | 0.28 | Multiburden      | Low                  | 203.9                 |
| Albania                  | 956,107     | 0.58 | Excess injury    | 701,146     | 0.72 | NCD              | Upper middle         | -26.7                 |
| Algeria                  | 8,739,186   | 0.46 | Excess injury    | 9,431,689   | 0.68 | NCD              | Upper middle         | 7.9                   |
| American Samoa           | 14,611      | 0.62 | Excess injury    | 20,029      | 0.74 | NCD              | Upper middle         | 37.1                  |
| Andorra                  | 10,784      | 0.87 | NCD              | 13,029      | 0.91 | NCD              | High                 | 20.8                  |
| Angola                   | 3,499,758   | 0.25 | Multiburden      | 8,434,139   | 0.43 | Multiburden      | Upper middle         | 141.0                 |
| Antigua and Barbuda      | 17,232      | 0.68 | NCD              | 23,297      | 0.78 | NCD              | High                 | 35.2                  |
| Argentina                | 8,620,512   | 0.64 | Excess injury    | 10,512,025  | 0.76 | NCD              | Upper middle         | 21.9                  |
| Armenia                  | 879,484     | 0.64 | Excess injury    | 571,828     | 0.75 | NCD              | Lower middle         | -35.0                 |
| Australia                | 3,995,612   | 0.82 | NCD              | 4,611,449   | 0.89 | NCD              | High                 | 15.4                  |
| Austria                  | 1,594,166   | 0.83 | Excess injury    | 1,421,089   | 0.89 | NCD              | High                 | -10.9                 |
| Azerbaijan               | 2,091,201   | 0.67 | Excess injury    | 2,116,573   | 0.77 | NCD              | Upper middle         | 1.2                   |
| Bahrain                  | 124,628     | 0.59 | NCD              | 301,718     | 0.74 | NCD              | High                 | 142.1                 |
| Bangladesh               | 35,226,440  | 0.31 | Multiburden      | 47,801,000  | 0.51 | Multiburden      | Lower middle         | 35.7                  |
| Barbados                 | 71,412      | 0.73 | NCD              | 55,566      | 0.80 | NCD              | High                 | -22.2                 |
| Belarus                  | 2,145,329   | 0.74 | Excess injury    | 1,470,221   | 0.83 | NCD              | Upper middle         | -31.5                 |
| Belgium                  | 2,002,439   | 0.84 | Excess injury    | 1,954,487   | 0.90 | NCD              | High                 | -2.4                  |
| Belize                   | 62,653      | 0.45 | Excess injury    | 114,638     | 0.62 | Excess injury    | Upper middle         | 83.0                  |
| Benin                    | 1,574,976   | 0.22 | Multiburden      | 3,622,750   | 0.35 | Multiburden      | Low                  | 130.0                 |
| Bermuda                  | 16,714      | 0.73 | NCD              | 18,088      | 0.82 | NCD              | High                 | 8.2                   |
| Bhutan                   | 165,628     | 0.30 | Multiburden      | 220,576     | 0.59 | Multiburden      | Lower middle         | 33.2                  |
| Bolivia                  | 2,169,246   | 0.42 | Multiburden      | 3,230,908   | 0.61 | NCD              | Lower middle         | 48.9                  |
| Bosnia and Herzegovina   | 1,135,286   | 0.54 | NCD              | 597,764     | 0.73 | NCD              | Upper middle         | -47.3                 |
| Botswana                 | 455,429     | 0.51 | Multiburden      | 662,734     | 0.70 | Multiburden      | Upper middle         | 45.5                  |
| Brazil                   | 46,287,744  | 0.54 | Excess injury    | 51,353,976  | 0.71 | Excess injury    | Upper middle         | 10.9                  |
| Brunei                   | 73,957      | 0.74 | Excess injury    | 103,499     | 0.87 | NCD              | High                 | 39.9                  |
| Bulgaria                 | 1,879,226   | 0.76 | Excess injury    | 1,031,074   | 0.85 | NCD              | Upper middle         | -45.1                 |
| Burkina Faso             | 2,853,236   | 0.13 | Multiburden      | 6,148,457   | 0.27 | Multiburden      | Low                  | 115.5                 |
| Burundi                  | 1,639,849   | 0.19 | Multiburden      | 3,529,890   | 0.28 | Multiburden      | Low                  | 115.3                 |
| Cambodia                 | 2,509,609   | 0.30 | Multiburden      | 4,703,125   | 0.50 | Multiburden      | Lower middle         | 87.4                  |
| Cameroon                 | 3,727,117   | 0.34 | Multiburden      | 7,799,218   | 0.45 | Multiburden      | Lower middle         | 109.3                 |
| Canada                   | 5,940,649   | 0.85 | Excess injury    | 6,500,305   | 0.91 | NCD              | High                 | 9.4                   |
| Cape Verde               | 109,406     | 0.32 | Multiburden      | 159,176     | 0.57 | Multiburden      | Lower middle         | 45.5                  |
| Central African Republic | 894,939     | 0.25 | Multiburden      | 1,612,402   | 0.32 | Multiburden      | Low                  | 80.2                  |
| Chad                     | 1,822,073   | 0.18 | Multiburden      | 4,865,529   | 0.30 | Multiburden      | Low                  | 167.0                 |
| Chile                    | 3,704,563   | 0.64 | NCD              | 3,957,753   | 0.80 | NCD              | High                 | 6.8                   |
| China                    | 351,669,472 | 0.51 | Excess injury    | 252,732,944 | 0.73 | NCD              | Upper middle         | -28.1                 |
| Colombia                 | 10,956,756  | 0.55 | Excess injury    | 12,269,012  | 0.71 | Excess injury    | Upper middle         | 12.0                  |

|                    |             |      |               |             |      |               |              |       |
|--------------------|-------------|------|---------------|-------------|------|---------------|--------------|-------|
| Comoros            | 131,087     | 0.27 | Multiburden   | 253,566     | 0.45 | Multiburden   | Low          | 93.4  |
| Congo              | 776,579     | 0.38 | Multiburden   | 1,452,999   | 0.53 | Multiburden   | Lower middle | 87.1  |
| Costa Rica         | 887,837     | 0.57 | NCD           | 1,161,784   | 0.73 | NCD           | Upper middle | 30.9  |
| Cote d'Ivoire      | 3,720,824   | 0.28 | Multiburden   | 7,592,306   | 0.41 | Multiburden   | Lower middle | 104.0 |
| Croatia            | 985,074     | 0.79 | Excess injury | 675,294     | 0.85 | NCD           | High         | -31.4 |
| Cuba               | 3,018,786   | 0.68 | Excess injury | 2,041,335   | 0.78 | NCD           | Upper middle | -32.4 |
| Cyprus             | 171,965     | 0.75 | Excess injury | 183,498     | 0.87 | NCD           | High         | 6.7   |
| Czech Republic     | 2,393,332   | 0.81 | Excess injury | 1,518,625   | 0.88 | NCD           | High         | -36.5 |
| DRC*               | 10,753,135  | 0.28 | Multiburden   | 25,802,172  | 0.31 | Multiburden   | Low          | 140.0 |
| Denmark            | 1,080,125   | 0.88 | NCD           | 1,078,151   | 0.93 | NCD           | High         | -0.2  |
| Djibouti           | 191,808     | 0.20 | Multiburden   | 270,004     | 0.42 | Multiburden   | Lower middle | 40.8  |
| Dominica           | 20,251      | 0.60 | NCD           | 18,913      | 0.73 | Excess injury | Upper middle | -6.6  |
| Dominican Republic | 2,334,103   | 0.53 | Excess injury | 2,959,746   | 0.70 | Excess injury | Upper middle | 26.8  |
| Ecuador            | 3,279,478   | 0.53 | Multiburden   | 4,467,885   | 0.67 | Excess injury | Upper middle | 36.2  |
| Egypt              | 16,432,880  | 0.46 | Multiburden   | 24,538,546  | 0.65 | NCD           | Lower middle | 49.3  |
| El Salvador        | 1,685,252   | 0.44 | Excess injury | 1,808,529   | 0.64 | Excess injury | Lower middle | 7.3   |
| Equatorial Guinea  | 100,733     | 0.29 | Multiburden   | 260,584     | 0.67 | Multiburden   | Upper middle | 158.7 |
| Eritrea            | 1,024,661   | 0.19 | Multiburden   | 1,697,888   | 0.39 | Multiburden   | Low          | 65.7  |
| Estonia            | 327,250     | 0.80 | Excess injury | 194,203     | 0.89 | NCD           | High         | -40.7 |
| Ethiopia           | 14,745,905  | 0.15 | Multiburden   | 35,234,792  | 0.33 | Multiburden   | Low          | 138.9 |
| FSM <sup>1</sup>   | 32,431      | 0.43 | Multiburden   | 36,914      | 0.61 | Multiburden   | Lower middle | 13.8  |
| Fiji               | 223,679     | 0.60 | Multiburden   | 233,620     | 0.74 | Multiburden   | Upper middle | 4.4   |
| Finland            | 976,178     | 0.84 | NCD           | 934,547     | 0.91 | NCD           | High         | -4.3  |
| France             | 12,287,715  | 0.80 | Excess injury | 11,524,168  | 0.87 | NCD           | High         | -6.2  |
| Gabon              | 277,197     | 0.46 | Multiburden   | 536,084     | 0.62 | Multiburden   | Upper middle | 93.4  |
| Georgia            | 1,246,700   | 0.72 | Excess injury | 706,166     | 0.75 | Excess injury | Upper middle | -43.4 |
| Germany            | 14,958,426  | 0.83 | NCD           | 12,282,011  | 0.89 | NCD           | High         | -17.9 |
| Ghana              | 4,790,710   | 0.36 | Multiburden   | 8,556,693   | 0.50 | Multiburden   | Lower middle | 78.6  |
| Greece             | 2,279,103   | 0.77 | Excess injury | 1,631,056   | 0.85 | NCD           | High         | -28.4 |
| Greenland          | 12,409      | 0.75 | Excess injury | 10,924      | 0.82 | Excess injury | High         | -12.0 |
| Grenada            | 27,345      | 0.50 | Multiburden   | 28,265      | 0.70 | Excess injury | Upper middle | 3.4   |
| Guam               | 37,187      | 0.76 | NCD           | 43,902      | 0.82 | NCD           | High         | 18.1  |
| Guatemala          | 2,976,287   | 0.36 | Multiburden   | 5,379,367   | 0.56 | Excess injury | Lower middle | 80.7  |
| Guinea             | 1,791,189   | 0.21 | Multiburden   | 4,156,846   | 0.32 | Multiburden   | Low          | 132.1 |
| Guinea-Bissau      | 313,110     | 0.21 | Multiburden   | 593,421     | 0.33 | Multiburden   | Low          | 89.5  |
| Guyana             | 243,274     | 0.52 | Multiburden   | 256,360     | 0.65 | Multiburden   | Upper middle | 5.4   |
| Haiti              | 2,154,447   | 0.30 | Multiburden   | 3,340,203   | 0.43 | Multiburden   | Low          | 55.0  |
| Honduras           | 1,622,820   | 0.38 | Multiburden   | 2,642,154   | 0.57 | Excess injury | Lower middle | 62.8  |
| Hungary            | 2,312,052   | 0.75 | Excess injury | 1,606,054   | 0.85 | NCD           | High         | -30.5 |
| Iceland            | 63,074      | 0.85 | NCD           | 68,574      | 0.92 | NCD           | High         | 8.7   |
| India              | 264,006,208 | 0.36 | Multiburden   | 370,100,480 | 0.58 | Multiburden   | Lower middle | 40.2  |
| Indonesia          | 59,361,032  | 0.50 | Multiburden   | 67,794,184  | 0.68 | Multiburden   | Lower middle | 14.2  |
| Iran               | 17,709,884  | 0.51 | Excess injury | 17,566,804  | 0.77 | Excess injury | Upper middle | -0.8  |
| Iraq               | 6,060,515   | 0.39 | Multiburden   | 11,661,292  | 0.47 | Excess injury | Upper middle | 92.4  |
| Ireland            | 946,662     | 0.77 | NCD           | 823,314     | 0.89 | NCD           | High         | -13.0 |
| Israel             | 1,247,064   | 0.74 | NCD           | 1,897,656   | 0.80 | NCD           | High         | 52.2  |

|                          |            |      |               |            |      |               |              |       |
|--------------------------|------------|------|---------------|------------|------|---------------|--------------|-------|
| Italy                    | 12,520,734 | 0.80 | NCD           | 8,767,832  | 0.87 | NCD           | High         | -30.0 |
| Jamaica                  | 759,042    | 0.60 | NCD           | 760,812    | 0.70 | Excess injury | Upper middle | 0.2   |
| Japan                    | 27,262,858 | 0.82 | NCD           | 17,385,084 | 0.88 | NCD           | High         | -36.2 |
| Jordan                   | 1,193,971  | 0.48 | Excess injury | 2,294,129  | 0.69 | Excess injury | Upper middle | 92.1  |
| Kazakhstan               | 4,362,833  | 0.68 | Excess injury | 3,734,792  | 0.76 | Excess injury | Upper middle | -14.4 |
| Kenya                    | 7,839,933  | 0.33 | Multiburden   | 14,969,302 | 0.52 | Multiburden   | Lower middle | 90.9  |
| Kiribati                 | 21,774     | 0.31 | Multiburden   | 33,397     | 0.45 | Multiburden   | Lower middle | 53.4  |
| Kuwait                   | 610,571    | 0.65 | Excess injury | 771,004    | 0.83 | NCD           | High         | 26.3  |
| Kyrgyzstan               | 1,268,816  | 0.60 | Multiburden   | 1,548,143  | 0.63 | NCD           | Lower middle | 22.0  |
| Laos                     | 1,371,560  | 0.30 | Multiburden   | 2,241,457  | 0.51 | Multiburden   | Lower middle | 63.4  |
| Latvia                   | 544,022    | 0.78 | Excess injury | 286,021    | 0.85 | NCD           | High         | -47.4 |
| Lebanon                  | 819,825    | 0.63 | Excess injury | 1,632,587  | 0.81 | NCD           | Upper middle | 99.1  |
| Lesotho                  | 534,316    | 0.37 | Multiburden   | 727,450    | 0.55 | Multiburden   | Lower middle | 36.1  |
| Liberia                  | 664,418    | 0.22 | Multiburden   | 1,477,320  | 0.33 | Multiburden   | Low          | 122.3 |
| Libya                    | 1,524,059  | 0.61 | Excess injury | 1,588,949  | 0.81 | Excess injury | Upper middle | 4.3   |
| Lithuania                | 817,432    | 0.79 | Excess injury | 494,746    | 0.88 | NCD           | High         | -39.5 |
| Luxembourg               | 71,667     | 0.88 | Excess injury | 100,765    | 0.94 | NCD           | High         | 40.6  |
| Macedonia                | 511,841    | 0.70 | NCD           | 403,856    | 0.79 | NCD           | Upper middle | -21.1 |
| Madagascar               | 3,779,694  | 0.25 | Multiburden   | 8,187,105  | 0.37 | Multiburden   | Low          | 116.6 |
| Malawi                   | 3,016,248  | 0.20 | Multiburden   | 5,921,904  | 0.35 | Multiburden   | Low          | 96.3  |
| Malaysia                 | 5,525,700  | 0.56 | Excess injury | 8,218,086  | 0.77 | NCD           | Upper middle | 48.7  |
| Maldives                 | 69,146     | 0.43 | Multiburden   | 98,633     | 0.69 | NCD           | Upper middle | 42.6  |
| Mali                     | 2,728,958  | 0.14 | Multiburden   | 5,877,705  | 0.27 | Multiburden   | Low          | 115.4 |
| Malta                    | 78,312     | 0.75 | NCD           | 75,523     | 0.86 | NCD           | High         | -3.6  |
| Marshall Islands         | 14,816     | 0.47 | Multiburden   | 22,726     | 0.58 | Multiburden   | Upper middle | 53.4  |
| Mauritania               | 660,969    | 0.32 | Multiburden   | 1,308,509  | 0.48 | Multiburden   | Lower middle | 98.0  |
| Mauritius                | 330,099    | 0.61 | NCD           | 294,298    | 0.76 | NCD           | Upper middle | -10.8 |
| Mexico                   | 29,429,604 | 0.56 | Excess injury | 35,169,720 | 0.73 | Excess injury | Upper middle | 19.5  |
| Moldova                  | 1,008,754  | 0.65 | Excess injury | 739,980    | 0.70 | NCD           | Lower middle | -26.6 |
| Mongolia                 | 718,179    | 0.56 | Multiburden   | 708,160    | 0.68 | Excess injury | Lower middle | -1.4  |
| Montenegro               | 153,182    | 0.75 | NCD           | 125,265    | 0.82 | NCD           | Upper middle | -18.2 |
| Morocco                  | 8,200,806  | 0.38 | Multiburden   | 8,862,646  | 0.62 | NCD           | Lower middle | 8.1   |
| Mozambique               | 4,410,417  | 0.14 | Multiburden   | 9,547,762  | 0.31 | Multiburden   | Low          | 116.5 |
| Myanmar                  | 13,645,516 | 0.35 | Multiburden   | 15,009,832 | 0.59 | Multiburden   | Lower middle | 10.0  |
| Namibia                  | 474,797    | 0.43 | Multiburden   | 796,112    | 0.62 | Multiburden   | Upper middle | 67.7  |
| Nepal                    | 5,798,511  | 0.24 | Multiburden   | 9,442,337  | 0.45 | Multiburden   | Low          | 62.8  |
| Netherlands              | 3,244,878  | 0.85 | NCD           | 3,141,794  | 0.92 | NCD           | High         | -3.2  |
| New Zealand              | 821,952    | 0.80 | Excess injury | 937,232    | 0.87 | NCD           | High         | 14.0  |
| Nicaragua                | 1,374,691  | 0.43 | Excess injury | 1,791,930  | 0.59 | NCD           | Lower middle | 30.4  |
| Niger                    | 2,372,583  | 0.14 | Multiburden   | 6,457,155  | 0.20 | Multiburden   | Low          | 172.2 |
| Nigeria                  | 29,996,162 | 0.32 | Multiburden   | 58,859,016 | 0.48 | Multiburden   | Lower middle | 96.2  |
| North Korea              | 6,226,704  | 0.50 | Excess injury | 5,778,666  | 0.49 | Excess injury | Low          | -7.2  |
| Northern Mariana Islands | 11,298     | 0.71 | NCD           | 26,768     | 0.80 | NCD           | High         | 136.9 |
| Norway                   | 918,586    | 0.85 | NCD           | 989,156    | 0.92 | NCD           | High         | 7.7   |
| Oman                     | 506,558    | 0.23 | Excess injury | 949,691    | 0.72 | Excess injury | High         | 87.5  |
| Pakistan                 | 32,855,126 | 0.30 | Multiburden   | 57,587,744 | 0.52 | Multiburden   | Lower middle | 75.3  |

|                                  |            |      |               |            |      |               |              |       |
|----------------------------------|------------|------|---------------|------------|------|---------------|--------------|-------|
| Palestine                        | 699,874    | 0.41 | Excess injury | 1,594,819  | 0.45 | NCD           | Lower middle | 127.9 |
| Panama                           | 793,910    | 0.60 | Excess injury | 1,016,448  | 0.75 | Excess injury | Upper middle | 28.0  |
| Papua New Guinea                 | 1,414,601  | 0.30 | Multiburden   | 2,443,235  | 0.42 | Multiburden   | Lower middle | 72.7  |
| Paraguay                         | 1,304,900  | 0.47 | NCD           | 1,993,741  | 0.67 | Excess injury | Upper middle | 52.8  |
| Peru                             | 7,098,725  | 0.55 | Multiburden   | 8,407,486  | 0.68 | NCD           | Upper middle | 18.4  |
| Philippines                      | 19,974,190 | 0.52 | Multiburden   | 30,160,568 | 0.64 | Multiburden   | Lower middle | 51.0  |
| Poland                           | 8,544,622  | 0.73 | Excess injury | 6,092,748  | 0.87 | NCD           | High         | -28.7 |
| Portugal                         | 2,411,011  | 0.69 | Excess injury | 1,649,366  | 0.80 | NCD           | High         | -31.6 |
| Puerto Rico                      | 951,583    | 0.77 | Excess injury | 788,811    | 0.87 | Excess injury | High         | -17.1 |
| Qatar                            | 100,570    | 0.62 | Excess injury | 449,692    | 0.79 | NCD           | High         | 347.1 |
| Romania                          | 5,938,974  | 0.73 | Excess injury | 3,060,972  | 0.84 | NCD           | Upper middle | -48.5 |
| Russia                           | 30,491,032 | 0.77 | Excess injury | 21,959,644 | 0.83 | Excess injury | Upper middle | -28.0 |
| Rwanda                           | 2,304,423  | 0.18 | Multiburden   | 3,765,757  | 0.39 | Multiburden   | Low          | 63.4  |
| Saint Lucia                      | 43,456     | 0.55 | Multiburden   | 46,981     | 0.71 | Excess injury | Upper middle | 8.1   |
| Saint Vincent and the Grenadines | 36,077     | 0.52 | Excess injury | 28,211     | 0.67 | Excess injury | Upper middle | -21.8 |
| Samoa                            | 58,507     | 0.45 | Multiburden   | 61,037     | 0.56 | NCD           | Lower middle | 4.3   |
| Sao Tome and Principe            | 39,372     | 0.29 | Multiburden   | 62,804     | 0.43 | Multiburden   | Lower middle | 59.5  |
| Saudi Arabia                     | 4,800,404  | 0.37 | Excess injury | 7,839,462  | 0.80 | NCD           | High         | 63.3  |
| Senegal                          | 2,444,043  | 0.24 | Multiburden   | 4,941,166  | 0.35 | Multiburden   | Low          | 102.2 |
| Serbia                           | 2,181,640  | 0.70 | Excess injury | 1,617,168  | 0.77 | NCD           | Upper middle | -25.9 |
| Seychelles                       | 22,458     | 0.60 | Excess injury | 20,340     | 0.74 | NCD           | High         | -9.4  |
| Sierra Leone                     | 1,186,556  | 0.22 | Multiburden   | 2,152,170  | 0.35 | Multiburden   | Low          | 81.4  |
| Singapore                        | 660,800    | 0.74 | NCD           | 765,330    | 0.89 | NCD           | High         | 15.8  |
| Slovakia                         | 1,278,537  | 0.78 | Excess injury | 890,128    | 0.88 | NCD           | High         | -30.4 |
| Slovenia                         | 447,741    | 0.81 | Excess injury | 286,644    | 0.88 | NCD           | High         | -36.0 |
| Solomon Islands                  | 105,612    | 0.32 | Multiburden   | 190,228    | 0.44 | Multiburden   | Lower middle | 80.1  |
| Somalia                          | 1,930,469  | 0.19 | Multiburden   | 3,653,360  | 0.27 | Multiburden   | Low          | 89.2  |
| South Africa                     | 12,321,688 | 0.60 | Multiburden   | 14,922,184 | 0.73 | Multiburden   | Upper middle | 21.1  |
| South Korea                      | 12,767,286 | 0.74 | Excess injury | 9,057,533  | 0.88 | NCD           | High         | -29.1 |
| South Sudan                      | 1,809,939  | 0.08 | Multiburden   | 4,154,082  | 0.19 | Multiburden   | Low          | 129.5 |
| Spain                            | 9,715,801  | 0.75 | Excess injury | 6,728,578  | 0.85 | NCD           | High         | -30.7 |
| Sri Lanka                        | 5,226,844  | 0.51 | Multiburden   | 4,831,243  | 0.70 | NCD           | Lower middle | -7.6  |
| Sudan                            | 6,582,336  | 0.29 | Multiburden   | 13,247,967 | 0.52 | Multiburden   | Lower middle | 101.3 |
| Suriname                         | 122,473    | 0.57 | Excess injury | 139,605    | 0.70 | Excess injury | Upper middle | 14.0  |
| Swaziland                        | 280,927    | 0.45 | Multiburden   | 443,862    | 0.59 | Multiburden   | Lower middle | 58.0  |
| Sweden                           | 1,668,271  | 0.81 | NCD           | 1,737,525  | 0.87 | NCD           | High         | 4.2   |
| Switzerland                      | 1,312,241  | 0.87 | Excess injury | 1,341,980  | 0.90 | NCD           | High         | 2.3   |
| Syria                            | 4,270,410  | 0.38 | NCD           | 6,099,035  | 0.64 | Excess injury | Lower middle | 42.8  |
| Taiwan                           | 5,717,931  | 0.73 | Excess injury | 4,327,055  | 0.88 | NCD           | High         | -24.3 |
| Tajikistan                       | 1,610,983  | 0.52 | Multiburden   | 2,543,344  | 0.58 | NCD           | Lower middle | 57.9  |
| Tanzania                         | 8,220,052  | 0.25 | Multiburden   | 17,560,448 | 0.43 | Multiburden   | Low          | 113.6 |
| Thailand                         | 18,043,852 | 0.54 | Multiburden   | 12,993,524 | 0.73 | Excess injury | Upper middle | -28.0 |
| The Bahamas                      | 77,727     | 0.72 | Excess injury | 88,639     | 0.78 | Excess injury | High         | 14.0  |
| The Gambia                       | 293,811    | 0.25 | Multiburden   | 663,185    | 0.35 | Multiburden   | Low          | 125.7 |
| Timor-Leste                      | 230,034    | 0.32 | Multiburden   | 385,945    | 0.53 | Multiburden   | Lower middle | 67.8  |

|                      |            |      |               |            |      |               |              |       |
|----------------------|------------|------|---------------|------------|------|---------------|--------------|-------|
| Togo                 | 1,222,669  | 0.25 | Multiburden   | 2,377,746  | 0.40 | Multiburden   | Low          | 94.5  |
| Tonga                | 33,078     | 0.45 | Multiburden   | 34,409     | 0.59 | Multiburden   | Lower middle | 4.0   |
| Trinidad and Tobago  | 346,778    | 0.65 | Excess injury | 269,724    | 0.77 | Excess injury | High         | -22.2 |
| Tunisia              | 2,577,675  | 0.48 | Excess injury | 2,510,657  | 0.70 | NCD           | Lower middle | -2.6  |
| Turkey               | 16,825,298 | 0.58 | Excess injury | 19,870,272 | 0.76 | NCD           | Upper middle | 18.1  |
| Turkmenistan         | 1,135,154  | 0.58 | Multiburden   | 1,495,568  | 0.76 | NCD           | Upper middle | 31.8  |
| Uganda               | 5,594,884  | 0.18 | Multiburden   | 13,636,716 | 0.38 | Multiburden   | Low          | 143.7 |
| Ukraine              | 10,583,102 | 0.75 | Excess injury | 6,559,694  | 0.79 | NCD           | Lower middle | -38.0 |
| United Arab Emirates | 427,960    | 0.56 | Excess injury | 1,556,415  | 0.77 | Excess injury | High         | 263.7 |
| United Kingdom       | 11,843,343 | 0.76 | NCD           | 11,846,610 | 0.86 | NCD           | High         | 0.0   |
| United States        | 54,099,292 | 0.85 | Excess injury | 64,615,120 | 0.90 | NCD           | High         | 19.4  |
| Uruguay              | 766,964    | 0.64 | Excess injury | 765,600    | 0.75 | NCD           | High         | -0.2  |
| Uzbekistan           | 6,273,705  | 0.54 | Multiburden   | 8,020,136  | 0.70 | NCD           | Lower middle | 27.8  |
| Vanuatu              | 45,698     | 0.34 | Multiburden   | 78,571     | 0.48 | Multiburden   | Lower middle | 71.9  |
| Venezuela            | 6,240,441  | 0.59 | Excess injury | 8,394,964  | 0.74 | Excess injury | Upper middle | 34.5  |
| Vietnam              | 21,617,560 | 0.44 | Multiburden   | 21,947,848 | 0.64 | Excess injury | Lower middle | 1.5   |
| Virgin Islands, U.S. | 27,428     | 0.78 | Excess injury | 20,966     | 0.88 | Excess injury | High         | -23.6 |
| Yemen                | 3,813,004  | 0.17 | Multiburden   | 9,302,930  | 0.45 | Multiburden   | Lower middle | 144.0 |
| Zambia               | 2,697,374  | 0.30 | Multiburden   | 5,523,037  | 0.46 | Multiburden   | Lower middle | 104.8 |
| Zimbabwe             | 3,505,384  | 0.43 | Multiburden   | 5,150,313  | 0.50 | Multiburden   | Low          | 46.9  |

\*Democratic Republic of the Congo

† Federated States of Micronesia

Table 4b. This table summarises the distribution of World Bank Income groups (2016) and the 2016 Country groupings as defined by the Lancet Commission for the 195 countries

| World Bank Income Group 2016 | 2016 Country Grouping |               |                 |
|------------------------------|-----------------------|---------------|-----------------|
|                              | Multi-burden          | Injury Excess | NCD predominant |
| Low                          | 30                    | 1             | 0               |
| Lower-middle                 | 31                    | 6             | 14              |
| Upper-middle                 | 9                     | 23            | 22              |
| High                         | 0                     | 7             | 52              |

Population distributions by World Bank Income grouping and gender, for 1990 and 2016.

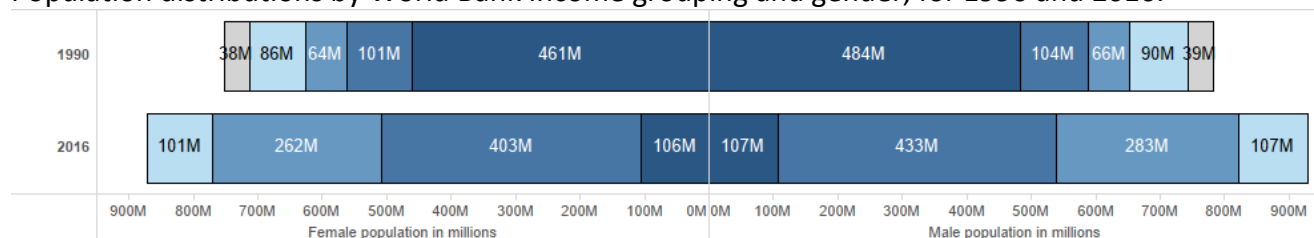

#### World Bank Income Group

- No allocation
- High income
- Upper middle income
- Lower middle income
- Low income

Figure 4a. Observed population distributions for China and India combined, by country group and gender, for 1990 and 2016.

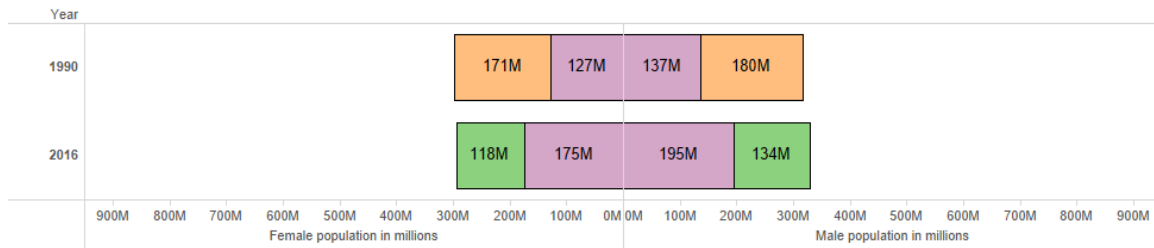

Figure 4b. Population distributions for scenario 1 (fixed demography, changing epidemiology), scenario 2 (changing demography, fixed epidemiology)

Scenario 1: fixed demography, changing epidemiology

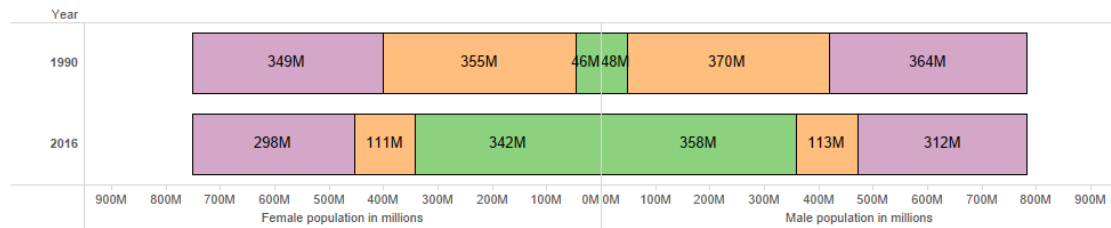

Scenario 2: changing demography, fixed epidemiology

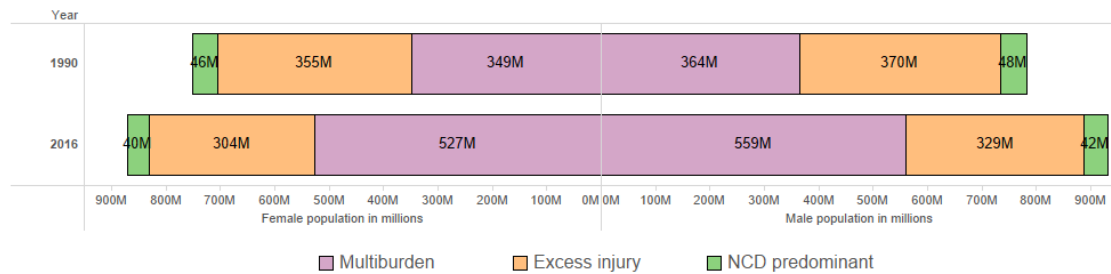

■ Multiburden     
 ■ Excess injury     
 ■ NCD predominant

## Appendix 5 – Counts of the indicators for the three country groups for two time points (typically 1990 and 2016)

This figure provides counts for each indicator, by gender for the three country groups. To the left of the dotted line, for the health outcomes are the counts of disability-adjusted life years lost (DALYs), to the right of the dotted line for risks and determinants are population counts. Counts for each indicator are shown for two time points, typically 1990 and 2016. Adolescent livebirths may be an overestimate as it is not adjusted for multiple births.

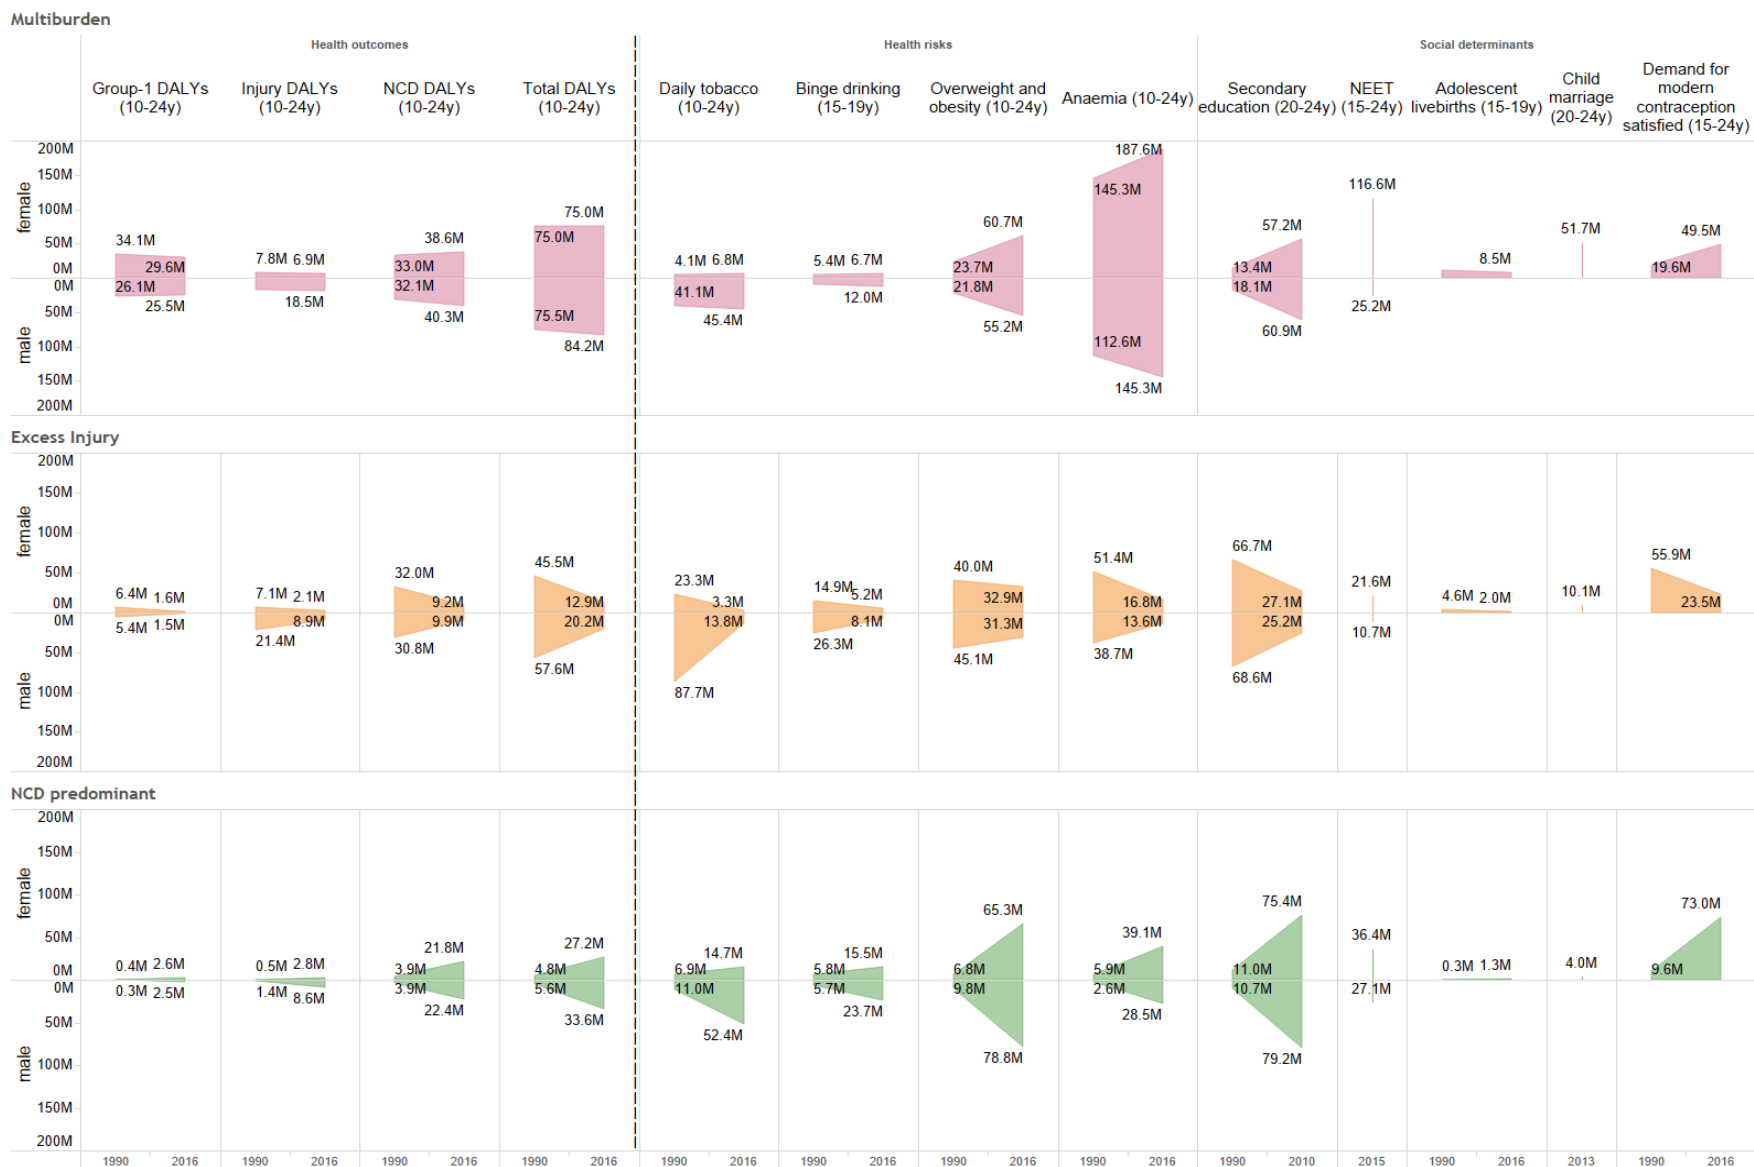

Appendix 5.1 Scenario 1 (global counts- fixed demography, changing epidemiology)

The global count (calculated as the sum of individual countries) in millions of each indicator (by gender) for the hypothetical scenario of the population remaining unchanged from 1990 but the indicator rates changing as observed in this study. To the left of the dotted line, for the health outcomes are the counts of disability-adjusted life years lost (DALYs), to the right of the dotted line for risks and determinants are population counts.

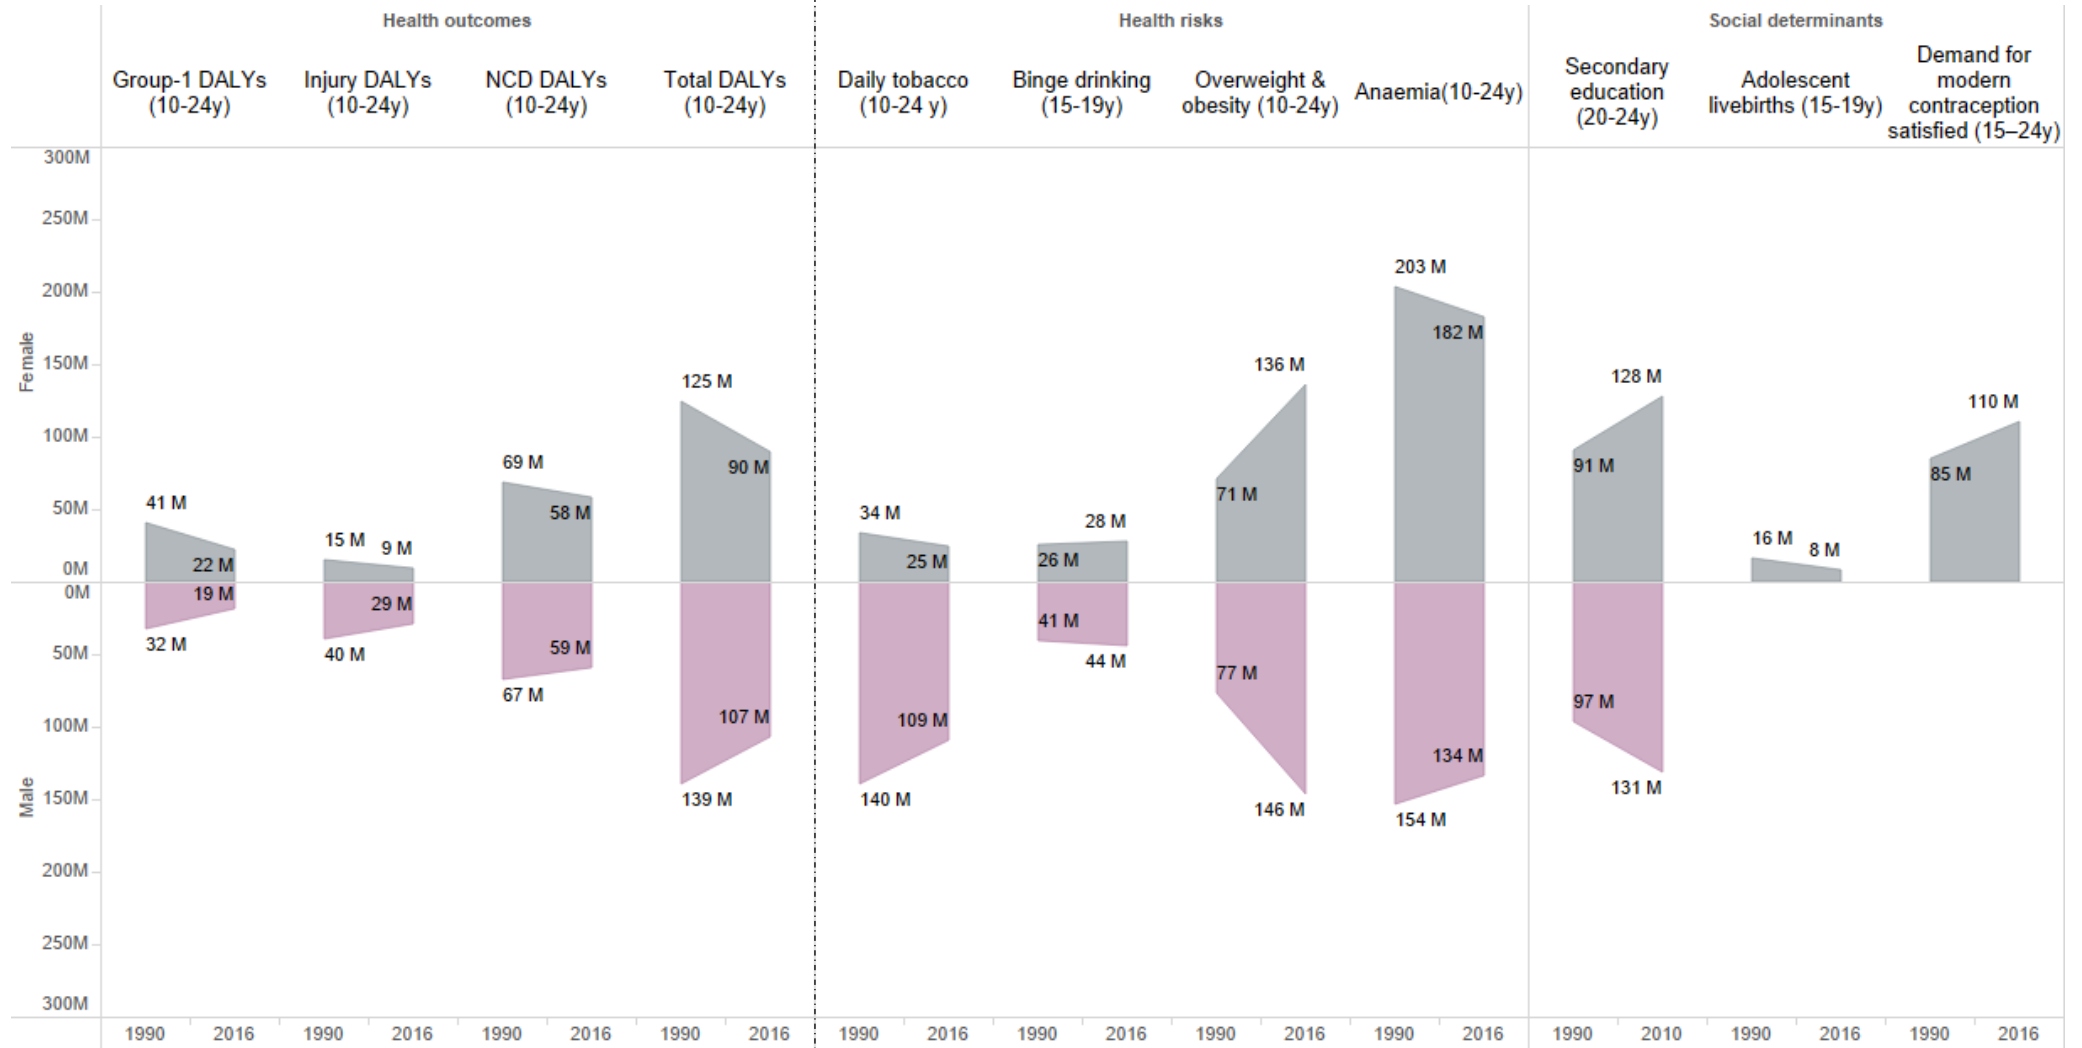



Appendix 5.2 Scenario 2 (global counts- changing demography, fixed epidemiology)

The global count (calculated as the sum of individual countries) in millions of each indicator (by gender) for the hypothetical scenario of the epidemiology (indicator prevalence or rates) remaining unchanged from 1990 but the demography changing as observed in this study. To the left of the dotted line, for the health outcomes are the counts of disability-adjusted life years lost (DALYs), to the right of the dotted line for risks and determinants are population counts.

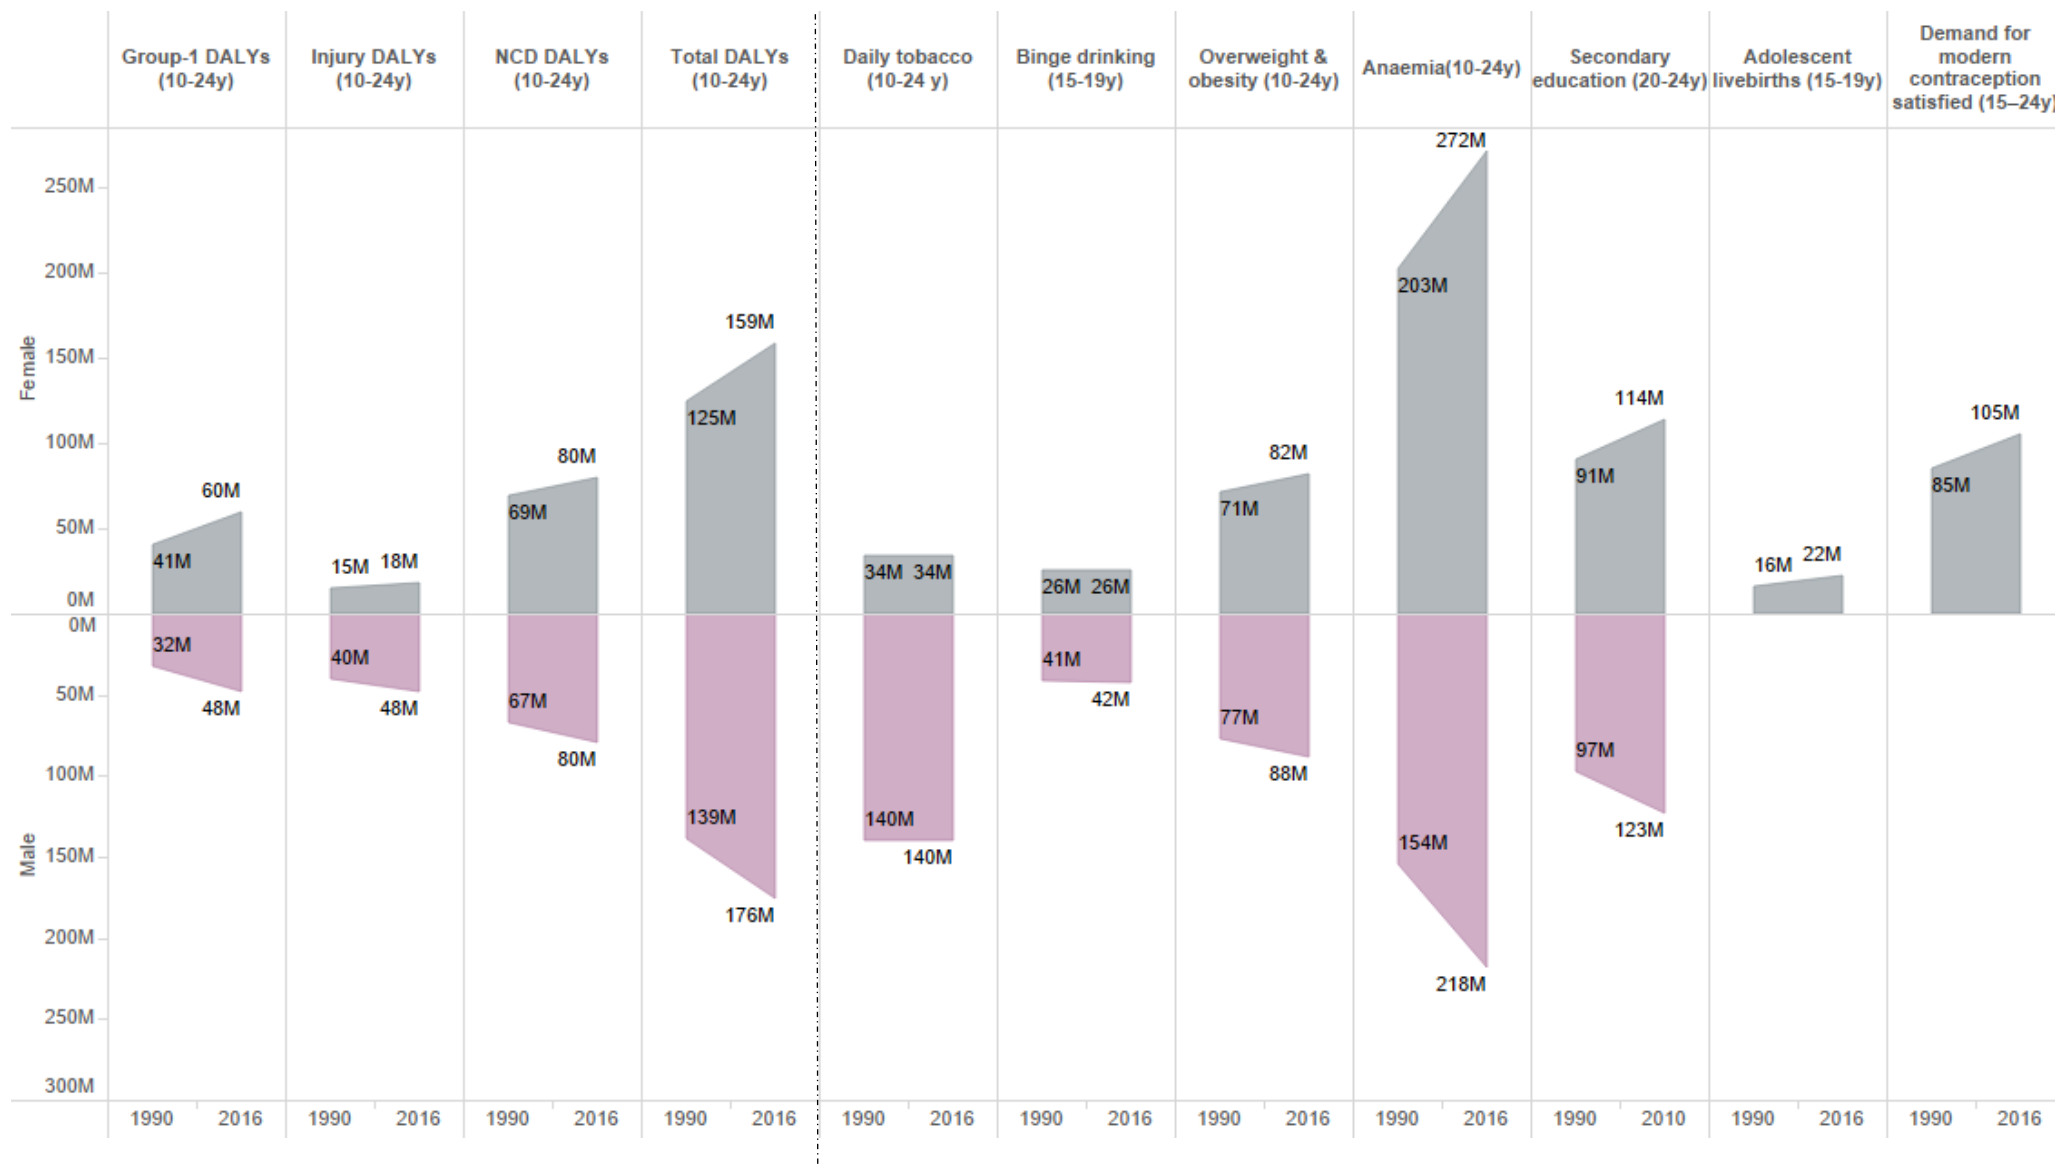

### Appendix 5.3 - Counts for China and India combined.

The count calculated as the sum of China and India in millions of each indicator (by gender). To the left of the dotted line, for the health outcomes are the counts of disability-adjusted life years lost (DALYs), to the right of the dotted line for risks and determinants are population counts. Note that the indicators for NEET and Child Marriage are not included as they are not available for both locations

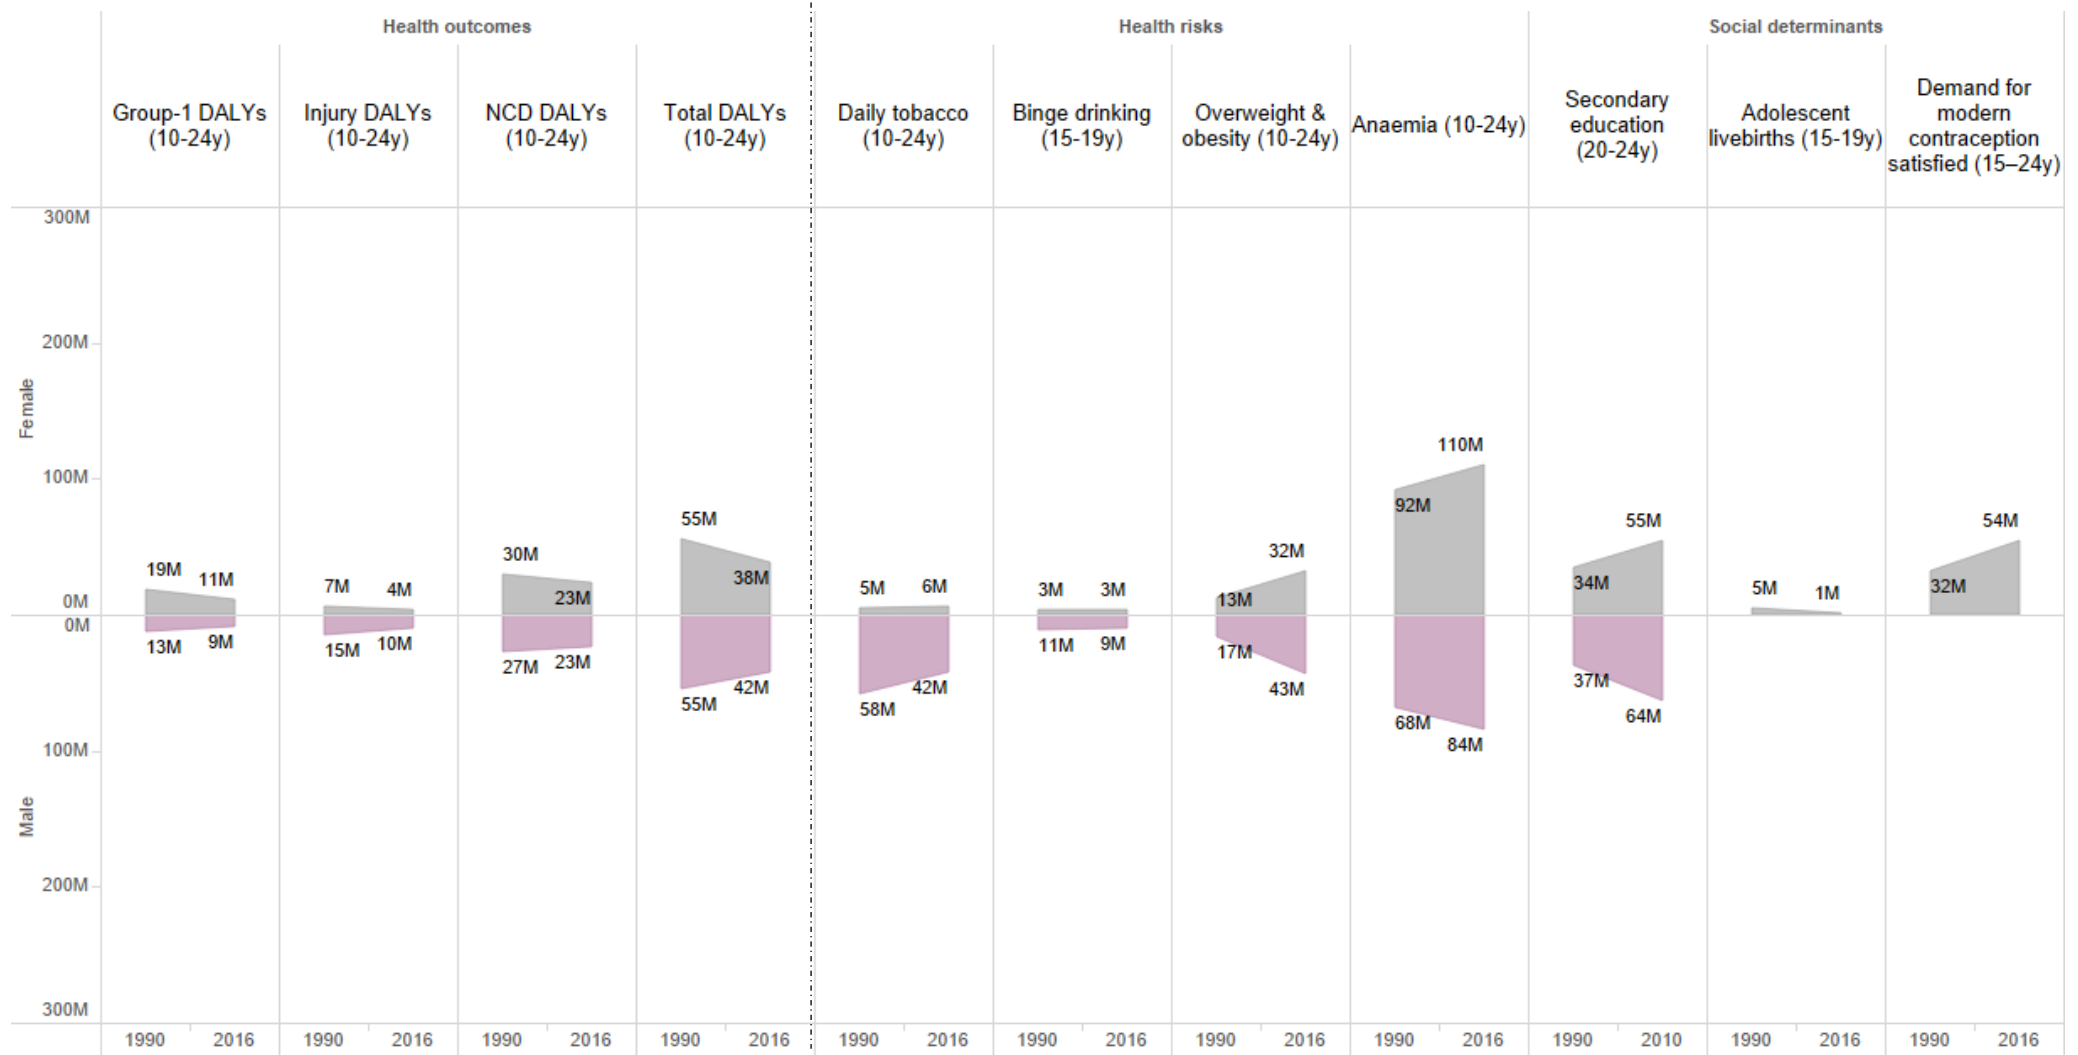

## Appendix 6 – The distribution of indicator estimates, by country group

Each country in the three groups (Multi-burden in purple, injury excess in orange, NCD predominant in green) is represented by a line in the figure. The line is located at the individual country's estimate for that indicator, stratified by sex.

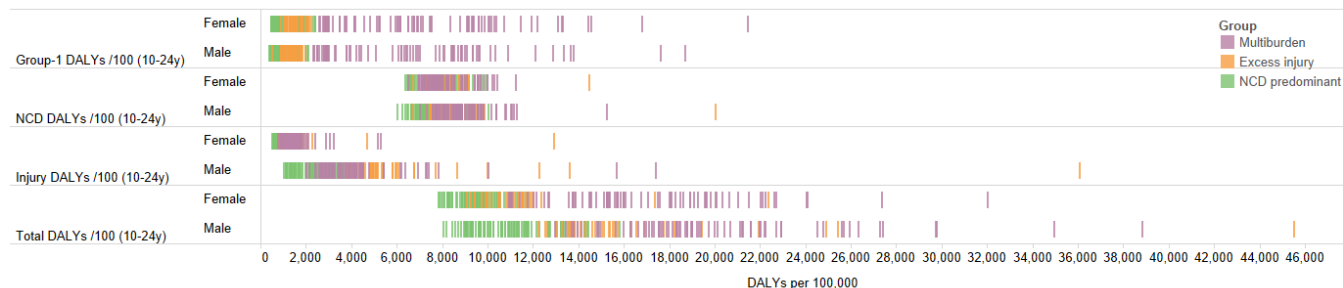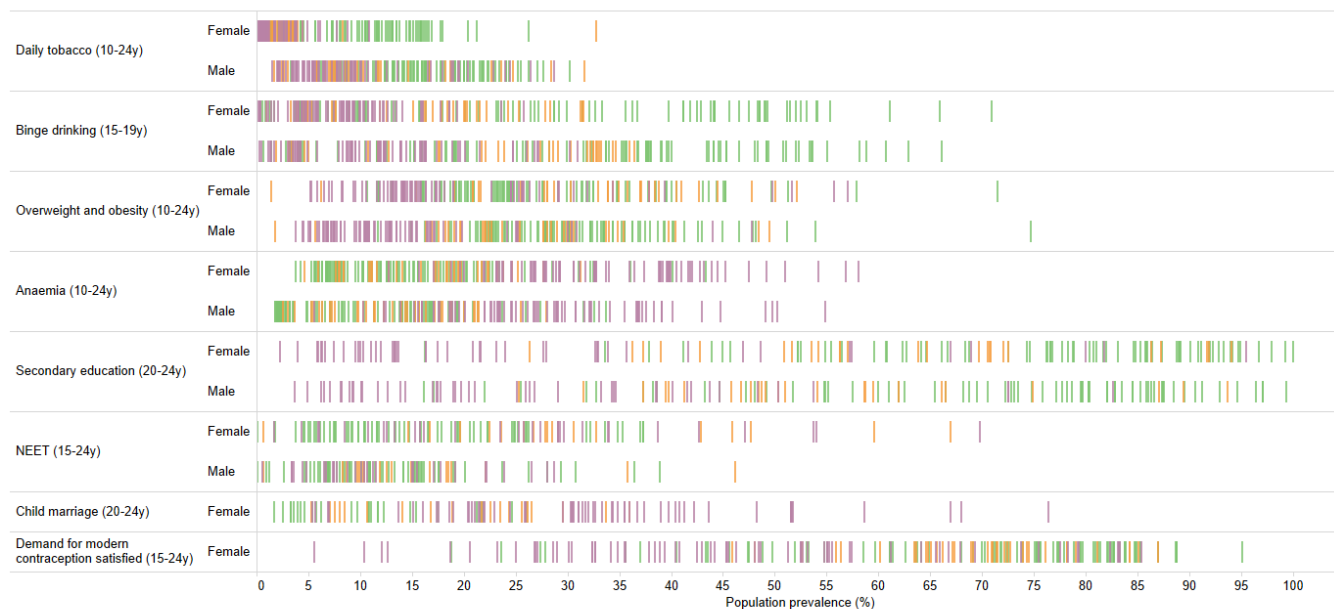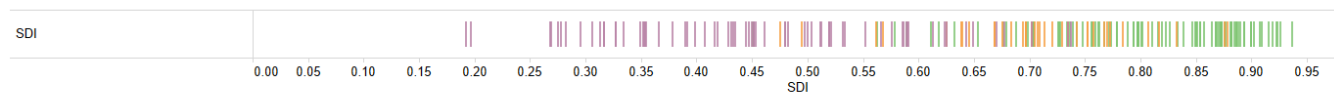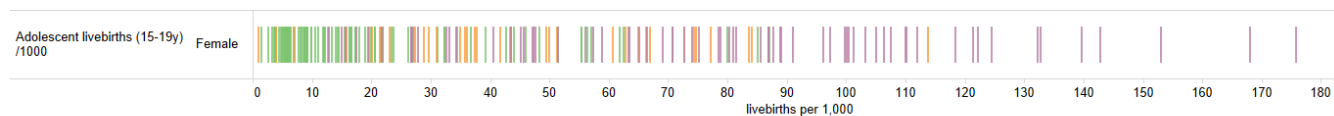

## Appendix 7 – Rates of change for the indicators by country

For each indicator, annualised rate of change is shaded from green (improving) to red (declining).

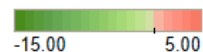

Panel A: Multi-burden countries

|                          | Health outcomes        |       |                       |       |                    |       |                      |       | Health risks           |       |                         |       |                                 |       |                  |       | Social determinants          |       |                                |       |                                                    |      |        |
|--------------------------|------------------------|-------|-----------------------|-------|--------------------|-------|----------------------|-------|------------------------|-------|-------------------------|-------|---------------------------------|-------|------------------|-------|------------------------------|-------|--------------------------------|-------|----------------------------------------------------|------|--------|
|                          | Group-1 DALYs (10-24y) |       | Injury DALYs (10-24y) |       | NCD DALYs (10-24y) |       | Total DALYs (10-24y) |       | Daily tobacco (10-24y) |       | Binge drinking (15-19y) |       | Overweight and obesity (10-24y) |       | Anaemia (10-24y) |       | Secondary education (20-24y) |       | Adolescent livebirths (15-19y) |       | Demand for modern contraception satisfied (15-24y) |      |        |
|                          | Female                 | Male  | Female                | Male  | Female             | Male  | Female               | Male  | Female                 | Male  | Female                  | Male  | Female                          | Male  | Female           | Male  | Female                       | Male  | Female                         | Male  | Female                                             | Male | Female |
| Afghanistan              | -2.13                  | -2.15 | -0.39                 | 0.29  | -0.17              | -0.08 | -1.06                | -0.39 | 0.04                   | 0.37  | -0.31                   | -0.22 | 0.85                            | 0.62  | -1.01            | -1.45 | 4.87                         | 5.21  | -2.04                          | 12.60 |                                                    |      |        |
| Angola                   | -2.11                  | -2.21 | -1.86                 | -1.81 | -0.34              | -0.42 | -1.51                | -1.60 | 0.83                   | 1.80  | -0.18                   | -0.09 | 7.11                            | 5.63  | -1.12            | -1.24 |                              |       |                                | -1.02 | 12.88                                              |      |        |
| Bangladesh               | -2.64                  | -2.53 | -1.43                 | 0.00  | -1.09              | -0.87 | -1.81                | -1.30 | 0.04                   | 0.23  | 0.91                    | 0.59  | 8.53                            | 12.57 | -1.16            | -1.83 | 24.63                        | 9.57  |                                | -1.69 | 2.30                                               |      |        |
| Benin                    | -1.23                  | -1.21 | -0.81                 | -0.60 | -0.40              | -0.35 | -0.82                | -0.75 | 2.18                   | -1.34 | -0.23                   | 0.63  | 12.50                           | 5.66  | -0.51            | -0.57 | 12.18                        | 3.19  |                                | -0.90 | 10.82                                              |      |        |
| Bhutan                   | -2.40                  | -1.97 | -2.72                 | -1.82 | -0.76              | -0.35 | -1.75                | -1.19 | -1.01                  | -1.39 | 0.58                    | 0.46  | 8.45                            | 9.39  | -0.51            | -1.03 |                              |       |                                | -3.60 | 5.86                                               |      |        |
| Botswana                 | -2.65                  | -2.22 | -0.28                 | 0.10  | -0.05              | -0.28 | -1.22                | -0.87 | -0.09                  | 0.53  | -0.07                   | -0.02 | 4.60                            | 2.66  | -0.75            | -1.41 | -0.99                        | -0.34 |                                | -2.52 | 2.77                                               |      |        |
| Burkina Faso             | -1.40                  | -1.47 | -0.60                 | -0.46 | -0.43              | -0.37 | -0.96                | -0.94 | -3.69                  | -0.29 | 0.06                    | -0.06 | 15.14                           | 3.17  | -0.45            | -0.48 |                              |       |                                | -0.99 | 14.61                                              |      |        |
| Burundi                  | -1.96                  | -1.82 | -2.31                 | -2.29 | -0.45              | -0.50 | -1.52                | -1.47 | -1.21                  | -1.10 | 0.01                    | -0.03 | 0.10                            | 0.27  | -0.89            | -1.07 | 11.16                        | 6.28  |                                | -1.66 | 42.80                                              |      |        |
| Cambodia                 | -2.51                  | -2.18 | -2.28                 | -0.84 | -0.50              | -0.15 | -1.69                | -1.09 | -1.61                  | -0.57 | -0.11                   | 0.15  | 7.63                            | 4.07  | -1.09            | -1.36 | 19.12                        | 6.00  |                                | 0.07  | 9.36                                               |      |        |
| Cameroon                 | -0.49                  | -0.41 | -0.42                 | 0.46  | -0.21              | 0.28  | -0.37                | 0.00  | -1.62                  | -0.86 | 0.47                    | 0.64  | 2.86                            | 2.92  | -0.48            | -0.64 | 3.38                         | 1.18  |                                | -1.45 | 23.95                                              |      |        |
| Cape Verde               | -1.68                  | -1.74 | -0.28                 | 0.78  | -0.24              | 0.07  | -0.77                | -0.27 | -0.44                  | 0.24  | 0.05                    | 0.30  | 5.59                            | 5.36  | -0.71            | -1.17 |                              |       |                                | -0.13 | 0.50                                               |      |        |
| Central African Repub... | -0.30                  | -0.35 | 0.33                  | 0.50  | 0.04               | 0.08  | -0.15                | -0.06 | 0.74                   | 1.73  | -0.44                   | -0.30 | 2.71                            | -0.51 | -0.39            | -0.44 | 0.72                         | 0.70  |                                | -1.06 | 5.02                                               |      |        |
| Chad                     | -0.76                  | -0.88 | -1.22                 | -0.91 | -0.17              | 0.06  | -0.59                | -0.57 | -0.84                  | -0.16 | -1.37                   | -0.58 | 4.15                            | 2.39  | -0.34            | -0.22 |                              |       |                                | -1.41 | 3.15                                               |      |        |
| Comoros                  | -1.72                  | -1.46 | -1.26                 | -1.12 | -0.41              | -0.40 | -1.11                | -0.93 | -0.14                  | 0.88  | 0.11                    | 0.05  | 2.60                            | 0.86  | -0.68            | -1.18 |                              |       |                                | -1.95 | 2.69                                               |      |        |
| Congo                    | -1.20                  | -1.59 | -1.22                 | -1.78 | -0.30              | -0.52 | -0.90                | -1.30 | 1.69                   | 2.03  | -0.29                   | -0.56 | 0.48                            | 2.13  | -0.61            | -0.76 | -4.46                        | -3.65 |                                | -0.73 | 7.28                                               |      |        |
| Cote d'Ivoire            | -0.91                  | -0.92 | -0.57                 | -0.34 | -0.16              | -0.03 | -0.60                | -0.50 | -0.27                  | 0.56  | 0.27                    | -0.05 | 3.80                            | 10.06 | -0.39            | -0.46 | 16.78                        | 5.19  |                                | -0.04 | 9.12                                               |      |        |
| Democratic Republic ...  | -1.38                  | -1.23 | -1.08                 | -0.39 | -0.24              | 0.00  | -0.98                | -0.69 | 0.81                   | -0.02 | -0.27                   | -0.21 | -0.90                           | -1.91 | -0.52            | -0.33 | -1.32                        | -1.70 |                                | 0.25  | 8.75                                               |      |        |
| Djibouti                 | -0.93                  | -0.77 | -1.38                 | -0.85 | -0.14              | -0.09 | -0.64                | -0.50 | -0.13                  | 0.08  | 0.18                    | 0.16  | 11.09                           | 9.71  | -0.62            | -0.39 |                              |       |                                | -1.58 | 7.42                                               |      |        |
| Equatorial Guinea        | -1.90                  | -1.90 | -2.15                 | -2.33 | -0.90              | -1.10 | -1.61                | -1.77 | -0.12                  | 0.00  | 0.03                    | -0.13 | 11.25                           | 9.53  | -1.35            | -1.66 |                              |       |                                | -1.39 | 15.92                                              |      |        |
| Eritrea                  | -1.61                  | -1.43 | -1.57                 | -1.42 | -0.28              | -0.38 | -1.17                | -1.05 | -1.65                  | -1.12 | 0.08                    | -0.05 | 5.92                            | 1.82  | -1.15            | -0.98 |                              |       |                                | -2.25 | 6.02                                               |      |        |
| Ethiopia                 | -2.45                  | -2.24 | -2.57                 | -2.48 | -0.61              | -0.57 | -1.99                | -1.95 | -0.09                  | 0.50  | 2.33                    | 3.63  | 7.57                            | 17.30 | -1.19            | -1.42 |                              |       |                                | -1.79 | 16.78                                              |      |        |
| Federated States of ...  | -1.28                  | -1.29 | 0.40                  | -0.01 | 0.07               | -0.07 | -0.28                | -0.28 | 0.35                   | 0.18  | 0.25                    | -0.20 | 1.81                            | 1.93  | -0.61            | -0.42 |                              |       |                                | -2.99 | 2.87                                               |      |        |
| Fiji                     | -1.05                  | -1.37 | 0.58                  | -0.09 | 0.30               | 0.02  | -0.02                | -0.30 | 0.64                   | -0.35 | -0.07                   | -0.40 | 1.18                            | 1.35  | -0.70            | -0.87 | 1.00                         | 0.80  |                                | -1.60 | 1.46                                               |      |        |
| Gabon                    | -1.26                  | -1.40 | -0.61                 | -1.38 | -0.01              | -0.37 | -0.70                | -1.03 | 0.41                   | 0.68  | -0.40                   | -0.38 | 4.33                            | 3.06  | -0.41            | -0.80 | 1.86                         | 1.55  |                                | -1.61 | 7.07                                               |      |        |
| Ghana                    | -1.35                  | -0.96 | -1.03                 | -0.36 | -0.53              | 0.02  | -0.99                | -0.47 | -1.70                  | 0.10  | 0.59                    | 0.20  | 11.20                           | 1.79  | -0.60            | -0.76 | 8.06                         | 4.25  |                                | -1.16 | 12.11                                              |      |        |
| Guinea                   | -1.15                  | -0.84 | -1.11                 | -0.24 | -0.35              | 0.06  | -0.84                | -0.40 | 0.00                   | -0.32 | 0.24                    | 0.51  | 4.13                            | 1.82  | -0.29            | -0.36 |                              |       |                                | -0.45 | 6.54                                               |      |        |
| Guinea-Bissau            | -0.95                  | -0.99 | -1.20                 | -0.76 | -0.47              | -0.25 | -0.80                | -0.68 | -0.64                  | -0.12 | -0.04                   | 0.22  | 5.48                            | 5.88  | -0.27            | -0.40 |                              |       |                                | -1.18 | 25.16                                              |      |        |
| Guyana                   | -0.95                  | -1.07 | 0.15                  | 0.34  | 0.02               | -0.01 | -0.19                | -0.07 | -2.32                  | -0.92 | -0.63                   | -0.35 | 2.61                            | 2.48  | -0.73            | -0.91 | 3.79                         | 4.37  |                                | -0.68 | -1.07                                              |      |        |
| Haiti                    | -0.94                  | -0.35 | 26.51                 | 19.56 | -0.78              | -0.38 | 3.18                 | 6.94  | -0.39                  | -0.20 | -0.69                   | 0.12  | 1.96                            | 2.70  | -0.51            | -0.87 | 5.15                         | 0.24  |                                | -1.35 | 6.70                                               |      |        |
| India                    | -1.90                  | -1.73 | -1.35                 | -0.83 | -0.74              | -0.46 | -1.35                | -0.99 | 6.37                   | 0.37  | -0.53                   | 0.37  | 8.48                            | 6.23  | 0.00             | -0.02 | 46.46                        | 28.28 |                                | -3.16 | 3.66                                               |      |        |
| Indonesia                | -1.96                  | -1.87 | -1.76                 | 0.40  | -0.37              | -0.42 | -1.20                | -0.78 | 1.71                   | 0.37  | 0.50                    | -1.11 | 6.82                            | 8.77  | -0.07            | -1.38 | 7.77                         | 4.88  |                                | -1.12 | 0.36                                               |      |        |
| Kenya                    | -1.03                  | -0.13 | -0.96                 | 0.27  | -0.15              | 0.18  | -0.70                | 0.04  | -2.44                  | -1.51 | -0.91                   | -0.89 | 3.63                            | -0.23 | 0.33             | 0.35  | 16.01                        | 8.33  |                                | -1.38 | 1.45                                               |      |        |
| Kiribati                 | -1.48                  | -1.26 | -0.54                 | -0.63 | 0.01               | 0.24  | -0.62                | -0.24 | -0.79                  | 0.97  | 0.24                    | 0.11  | 1.53                            | 1.47  | -0.51            | -0.29 |                              |       |                                | -3.08 | 3.37                                               |      |        |
| Laos                     | -2.62                  | -2.52 | -1.47                 | -0.99 | -0.70              | -0.60 | -1.67                | -1.30 | 0.27                   | -0.02 | -0.45                   | -0.63 | 6.82                            | 8.13  | -1.08            | -1.51 | 5.95                         | 1.28  |                                | -0.36 | 3.47                                               |      |        |
| Lesotho                  | 6.83                   | 6.17  | 0.30                  | 1.47  | 0.24               | 0.65  | 3.09                 | 2.63  | -1.49                  | 2.39  | -0.05                   | 0.02  | 2.34                            | 2.34  | -0.02            | -0.89 | 0.01                         | -0.05 |                                | 0.74  | 2.84                                               |      |        |
| Liberia                  | -1.70                  | -1.43 | -3.06                 | -3.06 | -0.46              | -0.25 | -1.73                | -2.07 | -2.78                  | -1.76 | 0.22                    | 1.20  | 1.82                            | 1.63  | -0.47            | -0.82 | 4.11                         | 0.10  |                                | -1.44 | 15.92                                              |      |        |
| Madagascar               | -1.36                  | -1.09 | -0.80                 | -0.69 | -0.32              | -0.36 | -0.90                | -0.70 | -0.82                  | -0.74 | 0.04                    | -0.08 | 0.09                            | 0.99  | -0.89            | -0.83 |                              |       |                                | -0.96 | 16.46                                              |      |        |
| Malawi                   | -1.01                  | -0.16 | -1.91                 | -0.38 | -0.36              | 0.47  | -0.88                | 0.02  | 0.97                   | -0.08 | -1.04                   | -1.22 | 2.79                            | 1.19  | -0.82            | -0.96 | 32.91                        | 8.96  |                                | -0.63 | 17.46                                              |      |        |
| Mali                     | -1.66                  | -1.53 | -1.62                 | -1.26 | -0.68              | -0.45 | -1.32                | -1.11 | -2.18                  | -0.95 | 0.03                    | 0.40  | 10.03                           | 7.06  | -0.48            | -0.52 | 32.05                        | 10.89 |                                | -0.42 | 14.54                                              |      |        |
| Marshall Islands         | -0.86                  | -0.91 | 0.69                  | 0.01  | 0.23               | -0.10 | -0.01                | -0.21 | 0.75                   | -0.83 | 0.02                    | -0.12 | 1.44                            | 1.39  | -0.48            | -0.34 |                              |       |                                | -1.99 | 1.32                                               |      |        |
| Mauritania               | -1.90                  | -1.83 | -1.58                 | -1.73 | -0.38              | -0.51 | -1.25                | -1.27 | -0.15                  | -0.09 | -0.12                   | 0.49  | 4.26                            | 2.06  | -0.65            | -1.02 | 7.02                         | 1.16  |                                | -1.14 | 1.56                                               |      |        |
| Mozambique               | -0.04                  | 0.41  | -2.01                 | -1.21 | -0.48              | -0.23 | -0.39                | -0.18 | -0.10                  | -0.20 | 0.19                    | 0.12  | 5.72                            | 3.40  | -0.45            | -0.71 | 19.01                        | 7.18  |                                | -0.75 | 10.07                                              |      |        |
| Myanmar                  | -2.56                  | -2.43 | -2.05                 | -0.71 | -0.83              | -0.48 | -1.73                | -1.31 | -0.10                  | -0.83 | -0.09                   | 0.18  | 13.02                           | 12.62 | -1.57            | -1.77 | 6.46                         | 11.38 |                                | -1.93 | 4.91                                               |      |        |
| Namibia                  | -0.60                  | -0.37 | -1.68                 | -0.35 | -0.37              | -0.20 | -0.64                | -0.30 | -0.86                  | 0.08  | 0.45                    | 1.58  | 2.46                            | 1.49  | -0.99            | -1.17 | -0.67                        | 0.52  |                                | -1.13 | 3.18                                               |      |        |
| Nepal                    | -2.62                  | -2.31 | -0.16                 | 0.55  | -0.68              | -0.47 | -1.63                | -0.99 | -2.77                  | -0.81 | 8.39                    | 0.96  | 24.35                           | 10.82 | -1.17            | -1.44 | 9.12                         | -0.57 |                                | -1.10 | 4.66                                               |      |        |
| Niger                    | -1.36                  | -1.36 | -1.07                 | -0.82 | -0.40              | -0.29 | -0.98                | -0.90 | -2.12                  | 1.13  | -0.04                   | 0.22  | 4.98                            | 2.87  | -0.43            | -0.24 | 15.95                        | -0.22 |                                | -0.52 | 12.07                                              |      |        |
| Nigeria                  | -1.38                  | -1.08 | -1.25                 | -0.54 | -0.79              | -0.37 | -1.11                | -0.73 | -3.09                  | -2.69 | 0.71                    | 0.48  | 5.34                            | 2.63  | -0.76            | -0.73 |                              |       |                                | -0.94 | 10.74                                              |      |        |
| Pakistan                 | -1.87                  | -1.69 | 0.21                  | 1.02  | 0.03               | 0.09  | -0.85                | -0.31 | -1.28                  | -0.53 | 0.34                    | 0.06  | 6.23                            | 3.84  | -0.43            | -0.66 | 8.50                         | 0.32  |                                | -2.07 | 9.33                                               |      |        |
| Papua New Guinea         | -1.27                  | -1.21 | -0.35                 | -0.54 | -0.15              | -0.23 | -0.63                | -0.57 | 0.30                   | -0.44 | -0.22                   | -0.32 | 1.41                            | 0.48  | -0.40            | -0.83 | 1.89                         | -1.28 |                                | -0.95 | 2.44                                               |      |        |
| Philippines              | -1.42                  | -1.49 | -0.90                 | -0.36 | -0.02              | -0.42 | -0.55                | -0.68 | -0.56                  | -0.71 | -0.21                   | -0.84 | 4.00                            | 4.79  | -1.05            | -1.61 | 1.66                         | 0.86  |                                | 1.48  | 2.19                                               |      |        |
| Rwanda                   | -2.77                  | -2.88 | -4.11                 | -4.19 | -0.65              | -0.60 | -2.30                | -2.60 | 4.75                   | -1.07 | -0.24                   | -0.50 | 1.41                            | -0.11 | -1.21            | -1.75 | 12.76                        | 17.02 |                                | -2.21 | 13.37                                              |      |        |
| Sao Tome and Princi...   | -2.08                  | -1.42 | -1.21                 | -0.43 | -0.70              | -0.24 | -1.27                | -0.65 | -0.69                  | 0.39  | 0.52                    | 0.67  | 2.88                            | 2.45  | -0.48            | -0.54 |                              |       |                                | -0.87 | 2.26                                               |      |        |
| Senegal                  | -1.90                  | -1.56 | -1.34                 | -0.56 | -0.42              | 0.01  | -1.27                | -0.77 | -2.53                  | -1.90 | -1.07                   | -0.61 | 3.25                            | 0.58  | -0.43            | -0.47 | 0.92                         | -1.69 |                                | -1.43 | 37.49                                              |      |        |
| Sierra Leone             | -0.16                  | -0.76 | -5.36                 | -5.69 | 0.04               | -0.49 | -0.36                | -1.35 | -1.26                  | -1.18 | 0.15                    | 0.44  | 2.54                            | 2.28  | -0.53            | -0.51 | 19.01                        | 7.20  |                                | -0.77 | 20.05                                              |      |        |
| Solomon Islands          | -1.74                  | -1.95 | 1.25                  | 0.39  | 0.48               | 0.05  | -0.36                | -0.46 | -0.60                  | -0.43 | -0.04                   | -0.13 | 2.30                            | 1.84  | -0.47            | -0.62 |                              |       |                                | -1.73 | 2.05                                               |      |        |
| Somalia                  | -1.14                  | -0.93 | -0.56                 | -0.49 | -0.24              | -0.22 | -0.78                | -0.58 | -1.54                  | -1.00 | -0.05                   | 0.01  | 1.09                            | 0.17  | 0.35             | 0.30  |                              |       |                                | -0.41 | 5.45                                               |      |        |
| South Africa             | 4.24                   | 6.24  | 0.09                  | -0.44 | 0.41               | 0.12  | 1.57                 | 0.91  | -2.84                  | -1.61 | 0.07                    | -0.28 | 4.02                            | 2.64  | 0.79             | 0.56  | 8.92                         | 7.76  |                                | -1.87 | 0.64                                               |      |        |
| South Sudan              | -1.20                  | -1.11 | -1.74                 | -1.70 | -0.18              | -0.03 | -1.02                | -1.06 | -1.42                  | -0.72 | 0.00                    | -0.09 | 0.92                            | 0.59  | -0.12            | -0.62 |                              |       |                                | -1.84 | 2.75                                               |      |        |
| Sudan                    |                        |       |                       |       |                    |       |                      |       |                        |       |                         |       |                                 |       |                  |       |                              |       |                                |       |                                                    |      |        |

Panel B: Injury excess countries

|                           | Health outcomes        |       |                       |       |                    |       |                      |       | Health risks           |       |                         |       |                                 |       |                  |       | Social determinants          |       |                                |       |                                                    |        |
|---------------------------|------------------------|-------|-----------------------|-------|--------------------|-------|----------------------|-------|------------------------|-------|-------------------------|-------|---------------------------------|-------|------------------|-------|------------------------------|-------|--------------------------------|-------|----------------------------------------------------|--------|
|                           | Group-1 DALYs (10-24y) |       | Injury DALYs (10-24y) |       | NCD DALYs (10-24y) |       | Total DALYs (10-24y) |       | Daily tobacco (10-24y) |       | Binge drinking (15-19y) |       | Overweight and obesity (10-24y) |       | Anaemia (10-24y) |       | Secondary education (20-24y) |       | Adolescent livebirths (15-19y) |       | Demand for modern contraception satisfied (15-24y) |        |
|                           | Female                 | Male  | Female                | Male  | Female             | Male  | Female               | Male  | Female                 | Male  | Female                  | Male  | Female                          | Male  | Female           | Male  | Female                       | Male  | Female                         | Male  | Female                                             | Female |
| Belize                    | -0.67                  | -0.58 | -0.56                 | 0.22  | -0.03              | 0.01  | -0.22                | 0.01  | 2.50                   | 0.29  | 0.14                    | -0.04 | 2.56                            | 2.99  | -0.82            | -0.63 | 8.70                         | 8.10  | -1.50                          | 1.36  |                                                    |        |
| Brazil                    | -1.01                  | -1.18 | -1.15                 | 0.27  | -0.08              | 0.12  | -0.39                | 0.06  | -2.96                  | -2.38 | 0.75                    | 0.67  | 4.24                            | 5.16  | -0.21            | -0.40 | 7.09                         | 8.73  | -0.81                          | 0.90  |                                                    |        |
| Colombia                  | -1.45                  | -1.33 | -1.96                 | -2.28 | -0.22              | -0.32 | -0.73                | -1.53 | -1.81                  | -0.68 | -1.64                   | -1.30 | 1.26                            | 3.65  | -1.02            | -1.28 | 8.21                         | 7.86  | -2.10                          | 1.89  |                                                    |        |
| Dominica                  | 0.15                   | -0.28 | 4.95                  | 2.62  | 0.09               | 0.04  | 0.49                 | 0.72  | -2.80                  | -2.38 | -0.45                   | -0.31 | 2.34                            | 2.79  | -1.00            | -0.30 |                              |       | -2.36                          | 1.32  |                                                    |        |
| Dominican Republic        | -0.81                  | -0.88 | 0.04                  | -0.52 | -0.30              | -0.48 | -0.38                | -0.55 | -2.17                  | -2.29 | -0.40                   | -0.47 | 3.21                            | 3.21  | -0.97            | -1.35 | 5.43                         | 5.60  | -0.99                          | 2.21  |                                                    |        |
| Ecuador                   | -2.04                  | -1.88 | -0.48                 | -0.78 | -0.41              | -0.29 | -0.77                | -0.68 | -1.11                  | -1.86 | -0.31                   | -0.61 | -0.16                           | 1.29  | -1.23            | -1.43 | 1.70                         | 1.31  | -0.38                          | 1.98  |                                                    |        |
| El Salvador               | -1.84                  | -1.41 | -1.44                 | -1.14 | -0.61              | -0.59 | -0.97                | -0.95 | 0.27                   | -0.29 | -0.24                   | -0.14 | 3.42                            | 4.82  | -1.51            | -1.55 | 6.76                         | 7.29  | -1.45                          | 0.83  |                                                    |        |
| Georgia                   | -1.05                  | -0.95 | -0.93                 | -0.33 | 0.02               | 0.38  | -0.30                | -0.04 | -0.80                  | 1.79  | -0.41                   | -2.13 | 1.93                            | 3.71  | -0.30            | 0.03  |                              |       | -1.00                          | 0.24  |                                                    |        |
| Greenland                 | -0.72                  | -1.22 | -1.00                 | -2.25 | -0.15              | -1.45 | -0.31                | -1.67 | -0.44                  | -0.30 | 0.14                    | -0.02 | 0.60                            | 0.85  | -0.28            | -0.65 |                              |       | -2.47                          | -0.24 |                                                    |        |
| Grenada                   | -1.06                  | -0.83 | 0.25                  | 0.88  | 0.10               | 0.30  | -0.14                | 0.29  | -0.75                  | 2.35  | -0.37                   | -0.27 | 3.16                            | 3.54  | -0.87            | -1.08 |                              |       | -2.85                          | 1.72  |                                                    |        |
| Guatemala                 | -2.41                  | -2.20 | -0.68                 | 0.50  | -0.18              | -0.08 | -1.07                | -0.38 | 0.86                   | 1.19  | -0.80                   | -0.53 | 4.24                            | 4.32  | -1.30            | -1.42 | 2.99                         | 2.55  | -1.67                          | 6.99  |                                                    |        |
| Honduras                  | -2.08                  | -1.71 | -1.01                 | -0.57 | -0.37              | -0.43 | -0.92                | -0.66 | -1.10                  | -0.16 | 0.38                    | 1.28  | 3.38                            | 3.86  | -1.28            | -1.55 | 4.81                         | 3.52  | -1.55                          | 1.94  |                                                    |        |
| Iran                      | -1.41                  | -0.87 | -2.16                 | -1.66 | 0.13               | 0.35  | -0.83                | -0.85 | 2.28                   | 0.85  | 0.20                    | 0.14  | 5.62                            | 4.94  | -1.33            | -1.53 | 4.22                         | 0.55  | -2.16                          | 2.27  |                                                    |        |
| Iraq                      | -1.19                  | -1.14 | 1.24                  | 3.01  | -0.30              | 0.04  | -0.14                | 1.08  | -1.22                  | -0.95 | -0.09                   | -0.10 | 1.15                            | 1.83  | -0.06            | -0.98 | 5.44                         | 1.78  | 2.67                           | 3.81  |                                                    |        |
| Jamaica                   | -0.64                  | -0.68 | 0.81                  | 1.96  | -0.13              | -0.07 | -0.15                | 0.32  | 1.65                   | 0.89  | -0.04                   | 0.06  | 1.22                            | 2.38  | -0.52            | -0.66 | 2.82                         | 4.05  | -1.79                          | 0.83  |                                                    |        |
| Jordan                    | -1.33                  | -1.08 | -0.64                 | -0.41 | -0.35              | -0.32 | -0.55                | -0.42 | -0.97                  | 1.26  | 0.06                    | -0.28 | 2.14                            | 3.07  | -0.77            | -1.15 | 0.02                         | -1.21 | -2.16                          | 3.20  |                                                    |        |
| Kazakhstan                | -1.48                  | -2.07 | -1.11                 | -1.63 | -0.42              | -0.55 | -0.74                | -1.11 | 0.09                   | -0.58 | 1.28                    | 1.01  | 0.14                            | 1.10  | -0.36            | -0.01 | 0.00                         | 0.31  | -1.70                          | 1.82  |                                                    |        |
| Libya                     | -0.94                  | -0.66 | 3.55                  | 4.10  | -0.25              | -0.05 | 0.09                 | 1.13  | 1.05                   | 0.18  | -0.04                   | 0.00  | 1.73                            | 2.59  | -0.68            | -0.31 | 8.52                         | 1.94  | -2.22                          | 2.90  |                                                    |        |
| Mexico                    | -1.51                  | -1.38 | -1.10                 | -1.11 | -0.04              | 0.22  | -0.43                | -0.52 | -1.98                  | -1.63 | 1.86                    | 0.64  | 2.86                            | 1.77  | 0.22             | 0.24  | 3.90                         | 3.46  | -1.42                          | 0.90  |                                                    |        |
| Mongolia                  | -2.27                  | -1.43 | -0.24                 | 0.24  | -0.56              | 0.00  | -1.01                | -0.14 | 3.39                   | -0.23 | 1.37                    | 1.47  | 2.80                            | 5.07  | -0.54            | -0.32 | 1.10                         | 1.60  | -2.21                          | 2.61  |                                                    |        |
| North Korea               | -4.08                  | -5.15 | 0.94                  | 1.24  | 0.01               | 0.14  | -0.67                | -0.01 | -0.93                  | -0.82 | -0.33                   | -0.20 | 0.52                            | 1.07  | -1.27            | -0.73 |                              |       | -2.72                          | -0.03 |                                                    |        |
| Oman                      | -2.07                  | -1.74 | -1.75                 | -0.50 | -0.11              | 0.11  | -0.77                | -0.35 | -1.52                  | -0.38 | 0.08                    | 0.06  | 8.07                            | 13.66 | -1.97            | -1.91 |                              |       | -3.63                          | 11.96 |                                                    |        |
| Panama                    | -0.77                  | 0.30  | -0.93                 | 0.35  | -0.08              | 0.24  | -0.30                | 0.28  | -1.53                  | -2.29 | -0.47                   | -0.29 | 4.72                            | 5.64  | -1.28            | -1.23 | 2.18                         | 2.46  | -1.13                          | 1.11  |                                                    |        |
| Paraguay                  | -1.12                  | -0.65 | 0.06                  | 1.52  | 0.15               | 0.31  | -0.11                | 0.55  | -1.34                  | -1.43 | 0.12                    | -0.28 | 4.81                            | 5.70  | -0.38            | -0.51 | 5.96                         | 5.71  | -2.02                          | 2.97  |                                                    |        |
| Puerto Rico               | -0.96                  | -1.19 | -1.63                 | -1.06 | -0.22              | -0.24 | -0.49                | -0.66 | -0.43                  | -0.36 | 1.09                    | 0.56  | 2.22                            | 2.72  | -0.73            | -0.86 |                              |       | -1.93                          | 0.69  |                                                    |        |
| Russia                    | -0.29                  | -0.49 | -1.47                 | -2.23 | -0.22              | -0.44 | -0.48                | -1.19 | -0.20                  | -1.33 | 1.43                    | 0.69  | 1.32                            | 3.35  | -0.01            | 0.03  | 0.01                         | -0.09 | -1.88                          | 0.64  |                                                    |        |
| Saint Lucia               | -1.19                  | -1.25 | 0.08                  | 0.03  | -0.13              | -0.16 | -0.36                | -0.28 | -0.25                  | 1.36  | -0.31                   | -0.35 | 1.25                            | 0.29  | -0.64            | -0.96 |                              |       | -2.31                          | 1.68  |                                                    |        |
| Saint Vincent and the ... | -0.89                  | -0.58 | -0.20                 | 1.03  | -0.15              | 0.23  | -0.30                | 0.37  | 0.44                   | -0.68 | -0.10                   | -0.19 | 3.52                            | 3.80  | -0.94            | -0.87 |                              |       | -1.80                          | 1.90  |                                                    |        |
| Suriname                  | -0.80                  | -0.63 | -0.85                 | 0.16  | -0.25              | 0.04  | -0.41                | -0.01 | 0.62                   | 1.47  | -0.12                   | -0.07 | 3.00                            | 4.35  | -0.83            | -0.86 |                              |       | -1.59                          | 0.56  |                                                    |        |
| Syria                     | -1.63                  | -0.98 | 42.78                 | 38.04 | -0.58              | -0.72 | 2.59                 | 7.54  | -2.08                  | -1.49 | 0.29                    | 0.25  | 1.89                            | 3.10  | -1.23            | -0.95 | 7.24                         | 5.24  | -2.44                          | 3.42  |                                                    |        |
| Thailand                  | -1.97                  | -2.15 | -2.38                 | -2.30 | -0.60              | -0.78 | -1.25                | -1.62 | -1.17                  | -0.75 | -0.03                   | 0.02  | 4.34                            | 7.39  | -1.49            | -1.87 | 9.63                         | 8.34  | -1.53                          | 0.45  |                                                    |        |
| The Bahamas               | -0.65                  | -0.50 | 0.08                  | 1.09  | -0.19              | 0.25  | -0.23                | 0.49  | -0.12                  | -1.08 | -0.30                   | -0.21 | 0.77                            | 1.07  | -0.44            | -0.22 |                              |       | -2.20                          | 0.66  |                                                    |        |
| Trinidad and Tobago       | -1.02                  | -0.48 | -0.04                 | 1.49  | -0.35              | 0.21  | -0.42                | 0.57  | 2.58                   | 0.12  | 0.24                    | 0.11  | 3.16                            | 5.26  | -0.69            | -1.20 | 12.03                        | 13.43 | -2.47                          | 1.27  |                                                    |        |
| United Arab Emirates      | -1.28                  | -0.96 | -0.95                 | -0.44 | -0.05              | -0.12 | -0.37                | -0.30 | 0.82                   | 0.58  | -0.08                   | -0.13 | 1.89                            | 2.04  | -0.73            | -1.04 | 0.57                         | 0.89  | -0.60                          | 3.60  |                                                    |        |
| Venezuela                 | -0.61                  | -0.04 | -0.03                 | 3.42  | -0.15              | 0.60  | -0.20                | 1.79  | -0.27                  | -0.03 | -0.84                   | -0.69 | 2.29                            | 2.83  | -1.37            | -1.11 | 6.28                         | 7.05  | -0.86                          | 1.20  |                                                    |        |
| Vietnam                   | -2.02                  | -1.82 | -1.47                 | -0.58 | -0.28              | -0.18 | -0.94                | -0.64 | 0.25                   | -1.50 | 0.28                    | 1.06  | 9.47                            | 7.09  | -1.69            | -2.17 | 31.63                        | 25.32 | 1.59                           | 0.83  |                                                    |        |
| Virgin Islands, U.S.      | 0.12                   | 0.75  | -1.02                 | -0.38 | -0.18              | -0.31 | -0.24                | -0.26 | -2.30                  | -1.57 | -0.29                   | -0.24 | 1.70                            | 2.29  | -0.85            | -0.79 |                              |       | -2.32                          | 0.66  |                                                    |        |



# Panel C: NCD predominant countries

|                         | Health outcomes        |       |                       |       |                    |       |                      |       | Health risks           |       |                         |       |                                 |       |                  |       | Social determinants          |       |                                |       |                                                    |      |
|-------------------------|------------------------|-------|-----------------------|-------|--------------------|-------|----------------------|-------|------------------------|-------|-------------------------|-------|---------------------------------|-------|------------------|-------|------------------------------|-------|--------------------------------|-------|----------------------------------------------------|------|
|                         | Group 1 DALYs (10-24y) |       | Injury DALYs (10-24y) |       | NCD DALYs (10-24y) |       | Total DALYs (10-24y) |       | Daily tobacco (10-24y) |       | Binge drinking (15-19y) |       | Overweight and obesity (10-24y) |       | Anaemia (10-24y) |       | Secondary education (20-24y) |       | Adolescent livebirths (15-19y) |       | Demand for modern contraception satisfied (15-24y) |      |
|                         | Female                 | Male  | Female                | Male  | Female             | Male  | Female               | Male  | Female                 | Male  | Female                  | Male  | Female                          | Male  | Female           | Male  | Female                       | Male  | Female                         | Male  | Female                                             | Male |
| Albania                 | -1.61                  | -1.39 | -1.40                 | -2.10 | 0.02               | 0.34  | -0.38                | -0.61 | 4.34                   | 0.62  | 0.66                    | 0.55  | 2.33                            | 2.71  | -1.32            | -1.20 | 1.95                         | 1.48  | 0.43                           | 1.26  |                                                    |      |
| Algeria                 | -1.81                  | -1.31 | -1.75                 | -1.77 | -0.22              | -0.20 | -0.77                | -0.85 | -0.04                  | -0.02 | -0.01                   | -0.03 | 7.38                            | 6.50  | -1.17            | -1.01 | 5.00                         | 0.20  | -2.54                          | 1.29  |                                                    |      |
| American Samoa          | -0.92                  | -0.83 | -0.57                 | -1.31 | -0.31              | -0.36 | -0.46                | -0.70 | -1.02                  | -0.81 | -0.19                   | -0.33 | 0.54                            | 0.48  | -1.10            | -0.48 |                              |       | -2.60                          | 1.38  |                                                    |      |
| Andorra                 | -0.44                  | -0.64 | -0.82                 | -1.39 | -0.10              | -0.17 | -0.18                | -0.46 | -1.30                  | -1.00 | 0.10                    | 0.07  | 1.09                            | 0.99  | -0.44            | -0.67 |                              |       | -1.17                          | 0.18  |                                                    |      |
| Antigua and Barbuda     | -0.54                  | -0.37 | -0.77                 | 0.90  | -0.30              | 0.13  | -0.37                | 0.26  | 0.67                   | -0.24 | -0.36                   | -0.34 | 1.66                            | 2.08  | -0.71            | -0.66 |                              |       | -1.63                          | 0.80  |                                                    |      |
| Argentina               | -0.88                  | -1.03 | -0.67                 | -0.32 | 0.00               | 0.16  | -0.17                | -0.06 | -0.69                  | -1.46 | 0.03                    | -0.39 | 3.01                            | 2.77  | -0.85            | -1.06 | 0.38                         | 0.40  | -0.08                          | 0.88  |                                                    |      |
| Armenia                 | -1.15                  | -1.34 | -2.02                 | -2.40 | -0.05              | -0.12 | -0.57                | -1.19 | -0.87                  | -0.16 | 0.88                    | -0.54 | 1.54                            | 5.13  | -0.52            | -0.41 | -0.21                        | -0.24 | -2.45                          | 2.17  |                                                    |      |
| Australia               | -0.67                  | -0.78 | -1.73                 | -2.19 | -0.14              | -0.59 | -0.35                | -1.00 | -2.17                  | -1.88 | 0.05                    | 1.03  | 2.10                            | 1.65  | -0.73            | -0.71 | -0.53                        | -0.81 | -1.53                          | 0.38  |                                                    |      |
| Austria                 | -0.56                  | -0.54 | -1.76                 | -2.45 | -0.10              | -0.43 | -0.34                | -1.07 | -0.56                  | -0.18 | 1.06                    | 0.63  | 2.08                            | 0.35  | -0.82            | -1.08 | 1.80                         | 0.65  | -2.62                          | 1.29  |                                                    |      |
| Azerbaijan              | -1.48                  | -1.47 | -1.36                 | -1.78 | -0.14              | 0.37  | -0.55                | -0.57 | -0.77                  | 0.68  | 0.11                    | -0.38 | 2.12                            | 4.86  | -0.23            | -0.52 |                              |       | 4.10                           | 0.53  |                                                    |      |
| Bahrain                 | -0.94                  | -0.87 | -1.80                 | -2.05 | -0.40              | -0.36 | -0.61                | -0.85 | -0.75                  | -0.55 | -0.03                   | -0.26 | 1.08                            | 1.64  | -0.45            | -0.85 | 0.36                         | 0.03  | -1.65                          | 2.14  |                                                    |      |
| Barbados                | -0.01                  | -0.12 | 0.22                  | -0.38 | -0.20              | -0.25 | -0.14                | -0.27 | -2.21                  | -2.02 | -0.08                   | -0.20 | 0.37                            | -0.12 | -0.46            | -0.81 | 2.90                         | -1.89 | -1.23                          | 0.66  |                                                    |      |
| Belarus                 | -0.93                  | -0.45 | -1.39                 | -2.03 | -0.23              | -0.26 | -0.51                | -1.02 | 1.94                   | -0.89 | 0.28                    | 0.23  | 0.85                            | 2.78  | -0.31            | 0.01  |                              |       | -2.24                          | 1.17  |                                                    |      |
| Belgium                 | -0.57                  | -0.55 | -2.02                 | -2.33 | -0.17              | -0.47 | -0.46                | -1.06 | -1.35                  | -1.46 | 0.36                    | 0.78  | 0.94                            | 0.76  | -0.57            | -0.68 | 0.36                         | 0.33  | -1.17                          | 0.21  |                                                    |      |
| Bermuda                 | -0.49                  | -0.95 | -1.38                 | -1.21 | -0.48              | -0.41 | -0.55                | -0.67 | -0.67                  | -0.24 | -0.64                   | -0.67 | 0.38                            | 1.43  | -0.34            | -0.80 |                              |       | -0.59                          | 0.68  |                                                    |      |
| Bolivia                 | -2.28                  | -1.96 | -1.92                 | -1.56 | -0.74              | -0.48 | -1.40                | -1.13 | -0.38                  | -0.20 | -0.67                   | -0.32 | 3.10                            | 2.41  | -0.80            | -0.84 | 2.26                         | 1.51  | -0.72                          | 9.68  |                                                    |      |
| Bosnia and Herzegovi..  | -1.49                  | -1.05 | -9.63                 | -9.42 | -0.33              | -0.53 | -1.50                | -2.98 | 0.03                   | 0.23  | -0.39                   | -0.86 | 5.48                            | 4.70  | -1.26            | -0.84 |                              |       | -2.89                          | 5.75  |                                                    |      |
| Brunei                  | -0.85                  | -0.31 | -1.31                 | -1.29 | -0.13              | -0.02 | -0.37                | -0.50 | 0.99                   | -0.94 | -0.30                   | -0.21 | 4.37                            | 4.05  | -0.74            | -0.65 | 1.66                         | 0.76  | -1.76                          | 0.61  |                                                    |      |
| Bulgaria                | -1.05                  | -1.03 | -1.05                 | -1.39 | -0.21              | -0.23 | -0.44                | -0.68 | 0.51                   | -0.09 | -0.92                   | 0.15  | 0.67                            | 0.58  | -0.58            | -0.11 | 1.33                         | 1.64  | -1.71                          | 0.46  |                                                    |      |
| Canada                  | -0.19                  | -0.45 | -1.28                 | -1.60 | 0.06               | -0.17 | -0.12                | -0.59 | -2.18                  | -1.82 | 0.03                    | -0.58 | 1.46                            | 1.05  | 0.36             | -0.10 | 1.53                         | 2.03  | -2.41                          | -0.05 |                                                    |      |
| Chile                   | -1.45                  | -1.48 | -0.77                 | -1.30 | 0.00               | -0.25 | -0.22                | -0.59 | -0.85                  | -0.72 | 0.12                    | -0.06 | 3.36                            | 4.01  | -0.93            | -1.14 | 2.47                         | 2.37  | -1.03                          | 0.95  |                                                    |      |
| China                   | -2.16                  | -1.90 | -1.98                 | -1.61 | -1.26              | -1.05 | -1.50                | -1.34 | -1.85                  | -0.78 | 2.59                    | 1.29  | 4.78                            | 6.20  | -0.09            | 0.01  | -0.57                        | -0.65 | -2.40                          | 1.00  |                                                    |      |
| Costa Rica              | -0.97                  | -0.87 | -0.61                 | -0.26 | -0.03              | 0.09  | -0.20                | -0.39 | -1.21                  | -0.45 | 0.23                    | -0.35 | 3.41                            | 2.28  | -0.91            | -0.88 | 2.82                         | 1.72  | -1.93                          | 0.06  |                                                    |      |
| Croatia                 | -1.18                  | -0.87 | -2.79                 | -3.00 | -0.20              | -0.47 | -0.72                | -1.42 | 0.32                   | -0.34 | 0.57                    | 0.59  | 2.48                            | 2.59  | -0.89            | -0.51 | 3.14                         | 2.67  | -2.45                          | 0.17  |                                                    |      |
| Cuba                    | -1.05                  | -0.74 | -2.00                 | -2.32 | -0.92              | -0.63 | -1.08                | -1.22 | -2.09                  | -1.78 | 2.17                    | 1.53  | 1.10                            | 1.32  | -0.80            | -0.87 | 2.02                         | 3.34  | -1.47                          | 0.32  |                                                    |      |
| Cyprus                  | -0.44                  | -0.30 | -1.55                 | -1.64 | 0.07               | 0.01  | -0.16                | -0.56 | 2.52                   | 1.23  | -0.23                   | 0.36  | 2.03                            | 2.44  | -0.23            | -0.92 | 0.56                         | 0.09  | -2.80                          | 0.60  |                                                    |      |
| Czech Republic          | -0.72                  | -0.36 | -1.03                 | -1.51 | -0.15              | -0.26 | -0.34                | -0.68 | -0.10                  | -0.46 | 0.87                    | 0.34  | 0.33                            | 2.05  | -0.14            | -0.17 | 0.46                         | 0.33  | -2.39                          | 1.41  |                                                    |      |
| Denmark                 | -0.61                  | -0.82 | -1.75                 | -2.42 | -0.21              | -0.43 | -0.40                | -0.92 | -2.42                  | -2.27 | 0.73                    | 0.69  | 2.64                            | 1.04  | -0.14            | -0.88 | -0.08                        | -0.73 | -2.34                          | 0.20  |                                                    |      |
| Egypt                   | -1.99                  | -1.63 | -1.56                 | -0.69 | -0.42              | -0.18 | -0.98                | -0.57 | 5.23                   | 1.03  | 0.09                    | 0.07  | 1.29                            | 1.05  | -0.89            | -0.90 | 5.96                         | 4.42  | -1.45                          | 2.93  |                                                    |      |
| Estonia                 | -0.55                  | -0.60 | -2.33                 | -3.08 | -0.49              | -0.51 | -0.85                | -1.64 | -0.91                  | -1.15 | 1.22                    | 1.34  | 2.62                            | 4.68  | -0.26            | -0.97 | -0.09                        | 0.05  | -2.70                          | 0.57  |                                                    |      |
| Finland                 | -0.71                  | -0.87 | -1.52                 | -2.02 | -0.13              | -0.46 | -0.32                | -0.87 | -1.55                  | -1.46 | 1.35                    | 0.40  | 2.36                            | 1.46  | -0.80            | -0.85 | 0.58                         | 0.67  | -1.78                          | 0.18  |                                                    |      |
| France                  | -0.84                  | -1.03 | -2.09                 | -2.34 | -0.27              | -0.50 | -0.55                | -1.11 | -1.64                  | -1.55 | 0.50                    | 0.19  | 2.43                            | 1.54  | -0.43            | -1.03 | 2.07                         | 1.77  | -0.90                          | 0.15  |                                                    |      |
| Germany                 | -0.52                  | -0.64 | -1.89                 | -2.40 | -0.20              | -0.47 | -0.42                | -1.00 | -0.83                  | -1.06 | 1.08                    | 0.74  | 2.98                            | 1.00  | -0.38            | -0.74 | 0.32                         | 0.56  | -2.39                          | 0.61  |                                                    |      |
| Greece                  | -0.37                  | -0.53 | -1.43                 | -1.67 | -0.06              | -0.13 | -0.25                | -0.67 | -1.27                  | -1.07 | 0.12                    | -0.06 | 2.04                            | 1.68  | -0.11            | -0.98 | 0.59                         | 0.36  | -2.09                          | 0.67  |                                                    |      |
| Guam                    | -0.46                  | -0.20 | 0.61                  | -0.06 | 0.20               | 0.19  | 0.12                 | 0.09  | -1.41                  | -1.27 | -0.48                   | -0.18 | 2.11                            | 0.36  | -0.71            | -0.25 |                              |       | -1.30                          | 0.69  |                                                    |      |
| Hungary                 | -0.54                  | -0.64 | -1.48                 | -1.92 | -0.42              | -0.54 | -0.59                | -0.98 | 0.07                   | -0.60 | -0.44                   | -0.32 | 0.29                            | 1.02  | -0.50            | -0.87 | 2.37                         | 1.87  | -1.94                          | 0.34  |                                                    |      |
| Iceland                 | -0.60                  | -0.70 | -2.24                 | -2.58 | -0.05              | -0.42 | -0.29                | -1.00 | -2.13                  | -1.98 | 0.01                    | -0.29 | 1.18                            | 2.11  | -0.03            | -0.69 | 2.06                         | 3.16  | -3.24                          | 0.28  |                                                    |      |
| Ireland                 | -0.83                  | -0.83 | -1.44                 | -2.19 | -0.10              | -0.13 | -0.28                | -0.69 | -0.99                  | -1.36 | 1.39                    | 1.03  | 1.29                            | 1.15  | -0.99            | -1.14 | 1.42                         | 1.60  | -1.96                          | 0.51  |                                                    |      |
| Israel                  | -0.66                  | -0.48 | -1.35                 | -1.42 | -0.23              | -0.28 | -0.39                | -0.58 | -1.73                  | -0.77 | 0.39                    | 0.21  | 2.56                            | 3.11  | -0.37            | -0.27 | 0.70                         | 0.66  | -2.18                          | 0.32  |                                                    |      |
| Italy                   | -0.85                  | -0.96 | -1.57                 | -2.25 | -0.25              | -0.55 | -0.43                | -1.08 | -0.92                  | -0.95 | 0.44                    | -0.86 | 1.18                            | 0.85  | -0.44            | -0.75 | 2.03                         | 2.29  | -1.13                          | 0.96  |                                                    |      |
| Japan                   | -0.32                  | -0.45 | -1.58                 | -2.36 | -0.01              | -0.06 | -0.17                | -0.63 | 0.09                   | -0.96 | -0.79                   | -1.15 | 1.30                            | 1.79  | 0.08             | 0.05  | 0.03                         | 0.12  | -0.41                          | -0.28 |                                                    |      |
| Kuwait                  | -0.85                  | -0.56 | -1.91                 | -1.67 | -0.03              | -0.07 | -0.52                | -0.85 | 0.22                   | 1.10  | 0.05                    | -0.24 | 3.68                            | 1.09  | -0.83            | -0.97 | -0.10                        | -1.58 | -3.64                          | 2.02  |                                                    |      |
| Kyrgyzstan              | -1.23                  | -1.61 | -1.31                 | -1.99 | -0.42              | -0.66 | -0.73                | -1.24 | 6.31                   | -0.87 | -0.02                   | -1.47 | 0.19                            | 2.34  | -0.06            | 0.12  | 0.41                         | 0.52  | -1.44                          | -0.97 |                                                    |      |
| Latvia                  | -1.11                  | -0.83 | -2.36                 | -2.87 | -0.29              | -0.78 | -0.80                | -1.74 | 0.75                   | 0.39  | 0.63                    | 0.36  | 1.94                            | 2.74  | -0.79            | -1.27 | 2.26                         | 2.82  | -2.14                          | 1.28  |                                                    |      |
| Lebanon                 | -1.47                  | -1.35 | -2.49                 | -2.24 | -0.31              | -0.45 | -1.15                | -1.54 | 2.78                   | 2.81  | -0.25                   | -0.12 | 1.68                            | 3.01  | -0.98            | -1.02 |                              |       | -2.88                          | 1.35  |                                                    |      |
| Lithuania               | -0.34                  | -0.21 | -1.80                 | -2.07 | -0.28              | 0.00  | -0.58                | -0.89 | 2.73                   | -0.26 | 0.14                    | 0.14  | 3.08                            | 5.81  | -0.32            | -0.05 | 0.09                         | -0.12 | -2.92                          | 1.70  |                                                    |      |
| Luxembourg              | -0.52                  | -0.95 | -2.11                 | -2.51 | -0.30              | -0.70 | -0.56                | -1.28 | -1.01                  | -0.97 | -0.54                   | 0.40  | 3.67                            | 1.93  | -0.20            | -1.05 | 1.35                         | 1.00  | -2.32                          | 0.23  |                                                    |      |
| Macedonia               | -0.97                  | -0.80 | -0.98                 | -1.08 | -0.31              | -0.13 | -0.47                | -0.46 | 3.28                   | 1.70  | 0.19                    | 0.09  | 2.63                            | 2.56  | -0.46            | -0.48 |                              |       | -2.58                          | 1.99  |                                                    |      |
| Malaysia                | -1.49                  | -1.14 | -1.26                 | -1.07 | -0.10              | -0.13 | -0.57                | -0.60 | 1.49                   | -0.32 | -0.26                   | -0.13 | 4.42                            | 5.75  | -1.30            | -1.15 | 3.43                         | 3.25  | -0.91                          | 1.62  |                                                    |      |
| Maldives                | -2.27                  | -1.91 | -2.42                 | -2.12 | -1.09              | -0.85 | -1.58                | -1.30 | 0.30                   | 2.36  | -0.32                   | -0.20 | 9.88                            | 8.70  | -1.07            | -1.29 | -2.20                        | -2.58 | -3.33                          | 2.87  |                                                    |      |
| Malta                   | -0.43                  | -0.65 | -0.78                 | -1.27 | 0.13               | 0.06  | 0.02                 | -0.27 | -0.04                  | -0.71 | -0.28                   | 0.28  | 2.19                            | 1.31  | 0.02             | -0.48 | -1.51                        | -2.20 | 1.01                           | 0.81  |                                                    |      |
| Mauritius               | -0.93                  | -0.67 | -1.42                 | -0.38 | -0.41              | -0.18 | -0.61                | -0.28 | 3.70                   | 1.40  | -0.50                   | -0.17 | 4.84                            | 5.48  | -0.68            | -0.89 | 3.28                         | 2.10  | -1.48                          | 0.71  |                                                    |      |
| Moldova                 | -1.19                  | -1.26 | -2.08                 | -2.28 | -0.41              | -0.56 | -0.83                | -1.34 | 1.49                   | 0.40  | 0.66                    | 0.61  | 4.62                            | 3.27  | -0.33            | 0.06  | -0.02                        | -0.14 | -2.53                          | 0.29  |                                                    |      |
| Montenegro              | -0.70                  | -0.41 | -0.97                 | -1.02 | -0.24              | -0.26 | -0.40                | -0.50 | 5.53                   | 5.29  | 0.31                    | 0.20  | 0.52                            | 1.43  | -0.84            | -0.33 |                              |       | -2.07                          | 0.25  |                                                    |      |
| Morocco                 | -2.22                  | -1.83 | -1.41                 | -1.16 | -0.24              | -0.16 | -0.95                | -0.75 | -0.06                  | -1.20 | 0.02                    | -0.26 | 5.53                            | 4.84  | -0.67            | -1.10 | 4.86                         | 1.58  | -2.03                          | 2.13  |                                                    |      |
| Netherlands             | -0.73                  | -0.52 | -1.72                 | -2.26 | -0.23              | -0.27 | -0.40                | -0.70 | -1.82                  | -1.70 | 1.98                    | -0.05 | 2.54                            | 1.76  | -1.09            | -0.36 | 0.26                         | -0.17 | -1.92                          | 0.51  |                                                    |      |
| New Zealand             | -0.75                  | -0.76 | -1.88                 | -2.11 | -0.12              | -0.44 | -0.42                | -1.02 | -1.51                  | -0.79 | 0.64                    | 1.92  | 2.76                            | 2.44  | -0.61            | -0.89 | 1.18                         | 1.04  | -1.26                          | 0.36  |                                                    |      |
| Nicaragua               | -2.05                  | -1.67 | -2.24                 | -1.66 | -0.34              | -0.31 | -0.91                | -0.96 | 0.03                   | 0.04  | 0.31                    | 0.45  | 3.48                            | 4.26  | -1.40            | -1.42 | 4.30                         | 3.05  | -1.53                          | 2.16  |                                                    |      |
| Northern Mariana Isla.. | -0.56                  | -0.44 | -0.92                 | -1.17 | -0.22              | -0.19 | -0.38                | -0.47 | 0.05                   | -0.77 | -0.13                   | -0.19 | 0.20                            | 0.33  | -0.34            | -0.75 |                              |       | -3.01                          | 0.79  |                                                    |      |
| Norway                  | -0.43                  | -0.37 | -1.48                 | -2.13 | -0.12              | -0.40 | -0.28                | -0.85 | -2.81                  | -2.61 | 0.40                    | -0.39 | 2.14                            | 2.50  | -0.02            | -0.37 | 0.01                         | -0.67 | -2.51                          | 0.26  |                                                    |      |
| Palestine               | -0.65                  | -0.99 | -1.92                 | -0.64 | -0.17              | 0.03  | -0.50                | -0.29 | 10.69                  | 0.03  | -0.08                   | -0.02 | 3.58                            | 3.34  | -0.04            | -0.11 |                              |       | -0.23                          | 0.74  |                                                    |      |
| Peru                    | -2.31                  | -2.31 | -1.81                 | -1.80 | -0.49              | -0.56 | -1.16                | -1.28 | -0.15                  | 0.71  | 0.04                    | 1.21  | 2.43                            | 2.25  | -0.77            | -0.83 | 3.66                         | 2.79  | -0.67                          | 4.36  |                                                    |      |
| Poland                  | -1.13                  | -0.91 | -1.07                 | -1.57 | -0.13              | -0.15 | -0.38                | -0.71 | -0.54                  | -1.05 |                         |       |                                 |       |                  |       |                              |       |                                |       |                                                    |      |
